# Supplementary material for: Addition of benzyl ethers to alkynes: a metal-free synthesis of 1H-isochromenes
Source: Royal Society of Chemistry journal article supplement (doi:10.1039/d1ob01941d), 2021-01-01
Supplement: d1ob01941d1.pdf [file d1ob01941d1.pdf]

## Supplementary Information

### **Addition of benzyl ethers to alkynes: a metal-free synthesis of 1*H*- isochromenes.**

Tzu-Hsuan Kuan, Trimurtulu Kotipalli, Cheng-Chun Chen and Duen-Ren Hou\*

Department of Chemistry, National Central University, No. 300 Jhong-Da Rd.,  
Jhong-li, Taoyuan, Taiwan, 32001.

## Table of Contents

|                                                                     |     |
|---------------------------------------------------------------------|-----|
| Table S1 Crystal data of <b>6ad</b> (CCDC 2068139).....             | S5  |
| <sup>1</sup> H NMR of compound <b>2a</b> .....                      | S7  |
| <sup>13</sup> C { <sup>1</sup> H} NMR of compound <b>2a</b> .....   | S8  |
| <sup>1</sup> H NMR of compound <b>2c</b> .....                      | S9  |
| <sup>13</sup> C { <sup>1</sup> H} NMR of compound <b>2c</b> .....   | S10 |
| <sup>1</sup> H NMR of compound <b>2d</b> .....                      | S11 |
| <sup>13</sup> C { <sup>1</sup> H} NMR of compound <b>2d</b> .....   | S12 |
| <sup>1</sup> H NMR of compound <b>2e</b> .....                      | S13 |
| <sup>13</sup> C { <sup>1</sup> H} NMR of compound <b>2e</b> .....   | S14 |
| <sup>1</sup> H NMR of compound <b>2f</b> .....                      | S15 |
| <sup>1</sup> H NMR of compound <b>2h</b> .....                      | S16 |
| <sup>1</sup> H NMR of compound <b>2i</b> .....                      | S17 |
| <sup>13</sup> C { <sup>1</sup> H} NMR of compound <b>2i</b> .....   | S18 |
| <sup>1</sup> H NMR of compound <b>2j</b> .....                      | S19 |
| <sup>13</sup> C { <sup>1</sup> H} NMR of compound <b>2j</b> .....   | S20 |
| <sup>1</sup> H NMR of compound <b>2k</b> .....                      | S21 |
| <sup>13</sup> C { <sup>1</sup> H} NMR of compound <b>2k</b> .....   | S22 |
| <sup>1</sup> H NMR of compound <b>2l</b> .....                      | S23 |
| <sup>13</sup> C { <sup>1</sup> H} NMR of compound <b>2l</b> .....   | S24 |
| <sup>1</sup> H NMR of compound <b>2m</b> .....                      | S25 |
| <sup>13</sup> C { <sup>1</sup> H} NMR of compound <b>2m</b> .....   | S26 |
| <sup>1</sup> H NMR of compound <b>1a</b> .....                      | S27 |
| <sup>1</sup> H NMR of compound <b>1b</b> .....                      | S28 |
| <sup>1</sup> H NMR for the reaction of <b>2d</b> to <b>1b</b> ..... | S29 |

|                                                                       |     |
|-----------------------------------------------------------------------|-----|
| <sup>1</sup> H NMR of compound <b>1i</b> .....                        | S30 |
| <sup>1</sup> H NMR of compound <b>1j</b> .....                        | S31 |
| <sup>1</sup> H NMR of compound <b>1k</b> .....                        | S32 |
| <sup>1</sup> H NMR of compound <b>1l</b> .....                        | S33 |
| <sup>1</sup> H NMR of compound <b>1m</b> .....                        | S34 |
| <sup>1</sup> H NMR of compound <b>6aa</b> .....                       | S35 |
| <sup>13</sup> C { <sup>1</sup> H} NMR of compound <b>6aa</b> .....    | S36 |
| <sup>1</sup> H NMR of compound <b>5-Cl</b> .....                      | S37 |
| <sup>13</sup> C { <sup>1</sup> H} NMR of compound <b>5-Cl</b> .....   | S38 |
| <sup>1</sup> H NMR of compound <b>6aa-Cl</b> .....                    | S39 |
| <sup>13</sup> C { <sup>1</sup> H} NMR of compound <b>6aa-Cl</b> ..... | S40 |
| <sup>1</sup> H NMR of compound <b>6ba</b> .....                       | S41 |
| <sup>13</sup> C { <sup>1</sup> H} NMR of compound <b>6ba</b> .....    | S42 |
| <sup>1</sup> H NMR of compound <b>6ca</b> .....                       | S43 |
| <sup>13</sup> C { <sup>1</sup> H} NMR of compound <b>6ca</b> .....    | S44 |
| <sup>1</sup> H NMR of compound <b>6da</b> .....                       | S45 |
| <sup>13</sup> C { <sup>1</sup> H} NMR of compound <b>6da</b> .....    | S46 |
| <sup>1</sup> H NMR of compound <b>6ea</b> .....                       | S47 |
| <sup>13</sup> C { <sup>1</sup> H} NMR of compound <b>6ea</b> .....    | S48 |
| <sup>1</sup> H NMR of compound <b>6fa</b> .....                       | S49 |
| <sup>13</sup> C { <sup>1</sup> H} NMR of compound <b>6fa</b> .....    | S50 |
| <sup>1</sup> H NMR of compound <b>6ga</b> .....                       | S51 |
| <sup>13</sup> C { <sup>1</sup> H} NMR of compound <b>6ga</b> .....    | S52 |
| <sup>1</sup> H NMR of compound <b>6ha</b> .....                       | S53 |
| <sup>13</sup> C { <sup>1</sup> H} NMR of compound <b>6ha</b> .....    | S54 |
| <sup>1</sup> H NMR of compound <b>6ia</b> .....                       | S55 |

|                                                                    |     |
|--------------------------------------------------------------------|-----|
| <sup>13</sup> C { <sup>1</sup> H} NMR of compound <b>6ia</b> ..... | S56 |
| <sup>1</sup> H NMR of compound <b>5ja</b> .....                    | S57 |
| <sup>13</sup> C { <sup>1</sup> H} NMR of compound <b>5ja</b> ..... | S58 |
| <sup>1</sup> H NMR of compound <b>6ab</b> .....                    | S59 |
| <sup>13</sup> C { <sup>1</sup> H} NMR of compound <b>6ab</b> ..... | S60 |
| <sup>1</sup> H NMR of compound <b>6ac</b> .....                    | S61 |
| <sup>13</sup> C { <sup>1</sup> H} NMR of compound <b>6ac</b> ..... | S62 |
| <sup>1</sup> H NMR of compound <b>6ad</b> .....                    | S63 |
| <sup>13</sup> C { <sup>1</sup> H} NMR of compound <b>6ad</b> ..... | S64 |
| <sup>1</sup> H NMR of compound <b>6ae</b> .....                    | S65 |
| <sup>13</sup> C { <sup>1</sup> H} NMR of compound <b>6ae</b> ..... | S66 |
| <sup>1</sup> H NMR of compound <b>5ae</b> .....                    | S67 |
| <sup>13</sup> C { <sup>1</sup> H} NMR of compound <b>5ae</b> ..... | S68 |
| <sup>1</sup> H NMR of compound <b>6af</b> .....                    | S69 |
| <sup>13</sup> C { <sup>1</sup> H} NMR of compound <b>6af</b> ..... | S70 |
| <sup>1</sup> H NMR of compound <b>6ag</b> .....                    | S71 |
| <sup>13</sup> C { <sup>1</sup> H} NMR of compound <b>6ag</b> ..... | S72 |
| <sup>1</sup> H NMR of compound <b>6ah</b> .....                    | S73 |
| <sup>13</sup> C { <sup>1</sup> H} NMR of compound <b>6ah</b> ..... | S74 |
| <sup>1</sup> H NMR of compound <b>8</b> .....                      | S75 |
| <sup>1</sup> H NMR of compound <b>9</b> .....                      | S76 |



**Table S1.** Crystal data and structure refinement for **6ad (CCDC2068139)**.

|                                   |                                                      |                   |
|-----------------------------------|------------------------------------------------------|-------------------|
| Identification code               | 1_a                                                  |                   |
| Empirical formula                 | C <sub>26</sub> H <sub>21</sub> Br <sub>2</sub> Cl O |                   |
| Formula weight                    | 544.70                                               |                   |
| Temperature                       | 296(2) K                                             |                   |
| Wavelength                        | 0.71073 Å                                            |                   |
| Crystal system                    | Monoclinic                                           |                   |
| Space group                       | P2 <sub>1</sub> /c                                   |                   |
| Unit cell dimensions              | a = 18.6040(8) Å                                     | α = 90°.          |
|                                   | b = 12.3733(4) Å                                     | β = 97.6430(10)°. |
|                                   | c = 20.0612(8) Å                                     | γ = 90°.          |
| Volume                            | 4576.9(3) Å <sup>3</sup>                             |                   |
| Z                                 | 8                                                    |                   |
| Density (calculated)              | 1.581 Mg/m <sup>3</sup>                              |                   |
| Absorption coefficient            | 3.675 mm <sup>-1</sup>                               |                   |
| F(000)                            | 2176                                                 |                   |
| Crystal size                      | 0.443 x 0.050 x 0.025 mm <sup>3</sup>                |                   |
| Theta range for data collection   | 2.194 to 28.309°.                                    |                   |
| Index ranges                      | -24 ≤ h ≤ 24, -16 ≤ k ≤ 16, -26 ≤ l ≤ 26             |                   |
| Reflections collected             | 202295                                               |                   |
| Independent reflections           | 11380 [R(int) = 0.1153]                              |                   |
| Completeness to theta = 25.242°   | 99.9 %                                               |                   |
| Absorption correction             | Numerical Mu Calculated                              |                   |
| Max. and min. transmission        | 0.7457 and 0.6638                                    |                   |
| Refinement method                 | Full-matrix least-squares on F <sup>2</sup>          |                   |
| Data / restraints / parameters    | 11380 / 0 / 541                                      |                   |
| Goodness-of-fit on F <sup>2</sup> | 1.021                                                |                   |
| Final R indices [I > 2σ(I)]       | R1 = 0.0827, wR2 = 0.2047                            |                   |
| R indices (all data)              | R1 = 0.1548, wR2 = 0.2544                            |                   |
| Extinction coefficient            | n/a                                                  |                   |
| Largest diff. peak and hole       | 2.722 and -1.165 e.Å <sup>-3</sup>                   |                   |

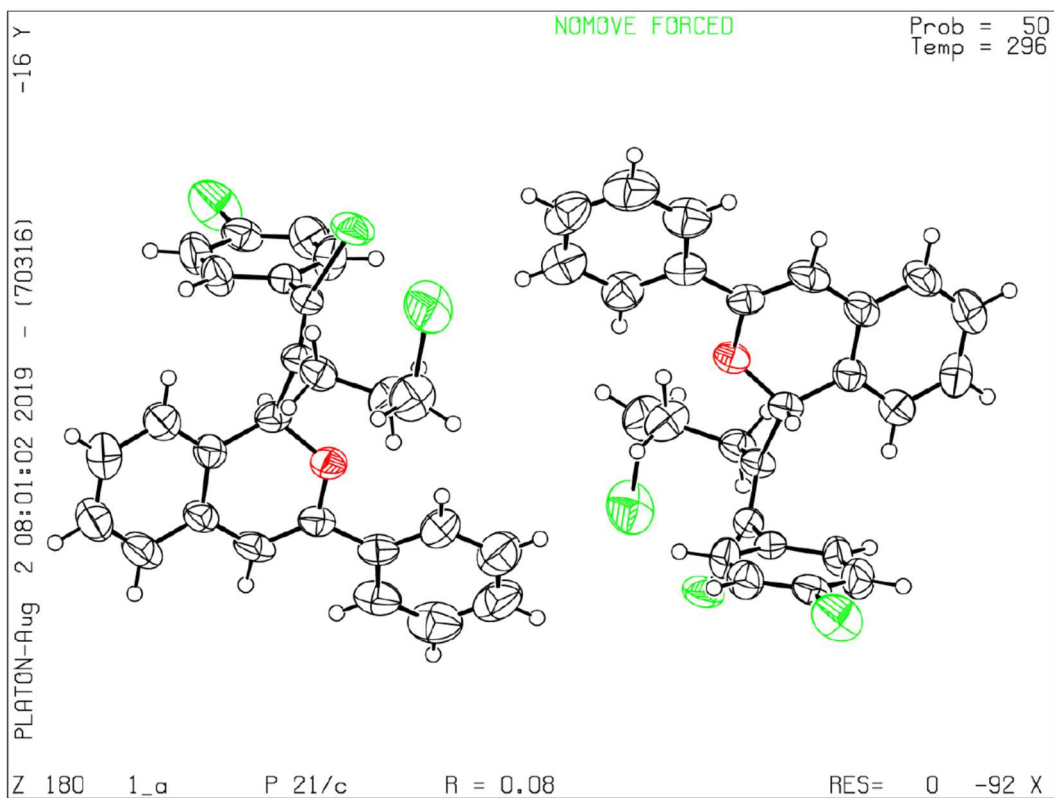

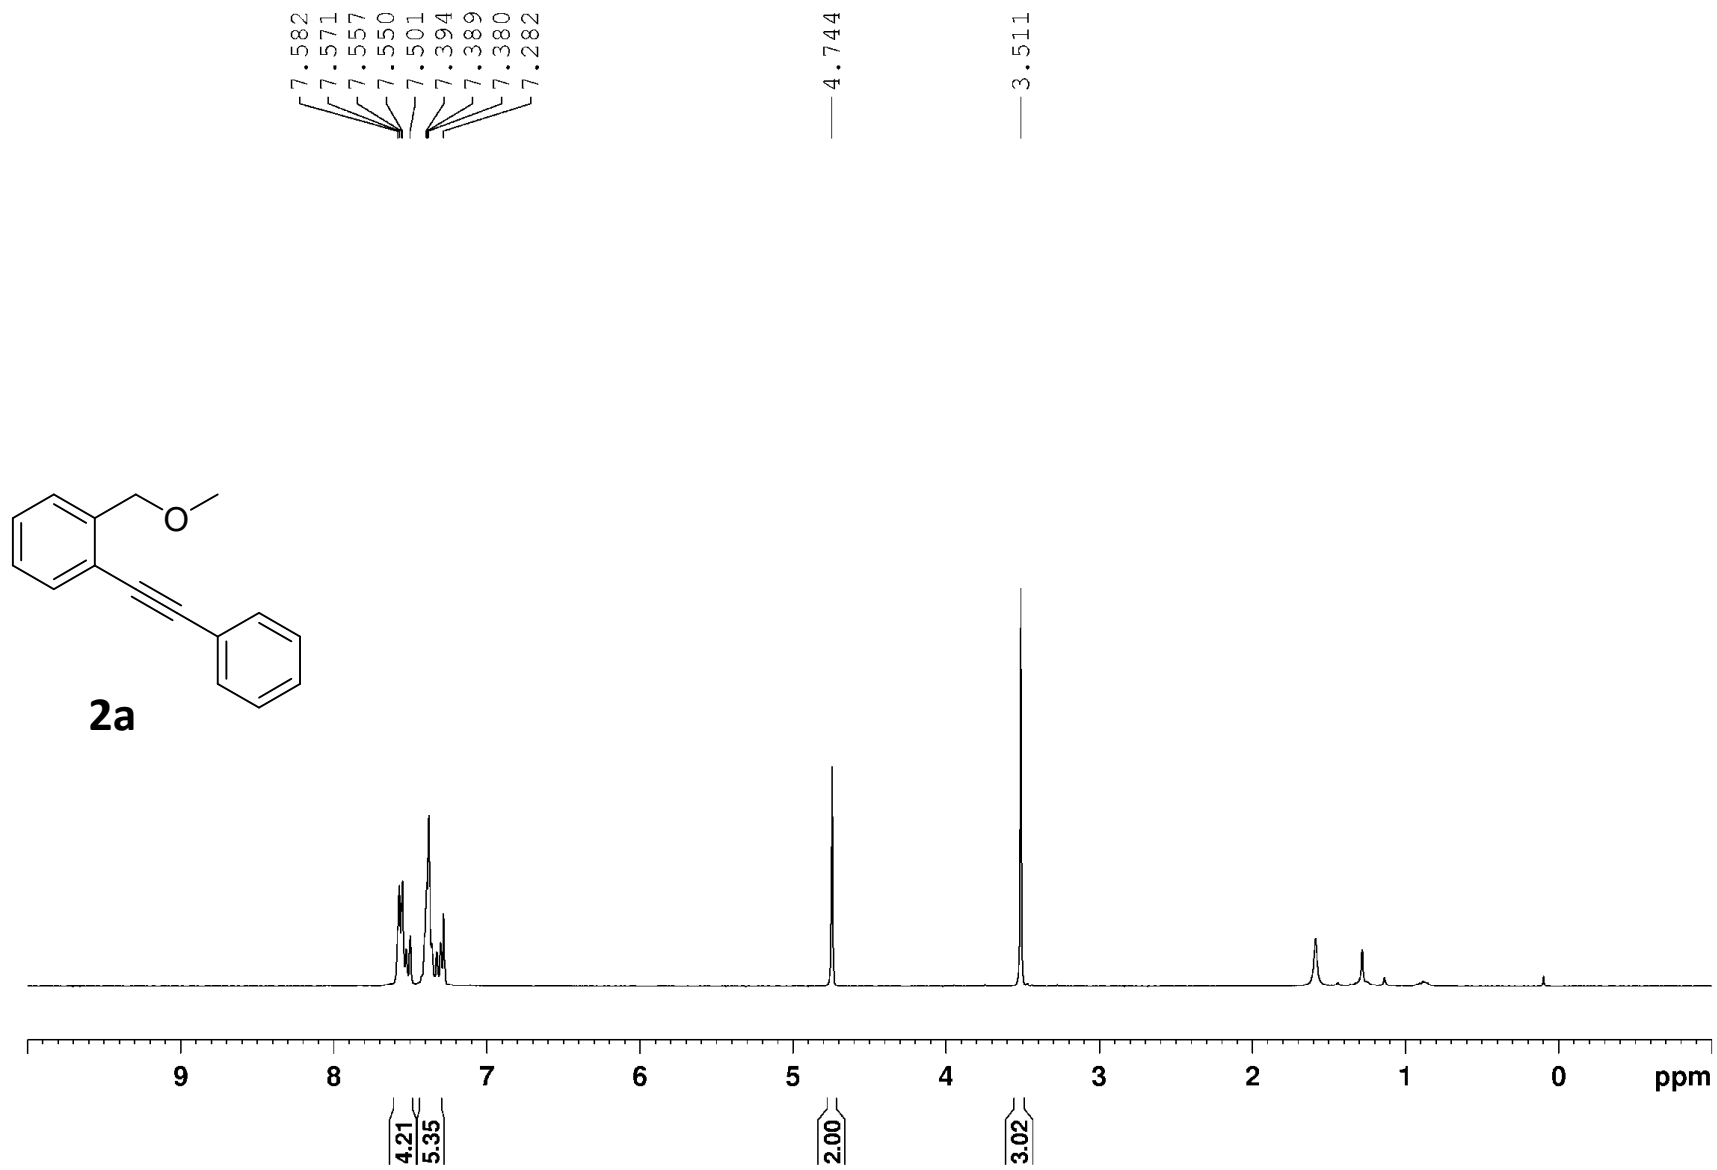

<sup>1</sup>H NMR of compound **2a** (300 MHz, CDCl<sub>3</sub>)

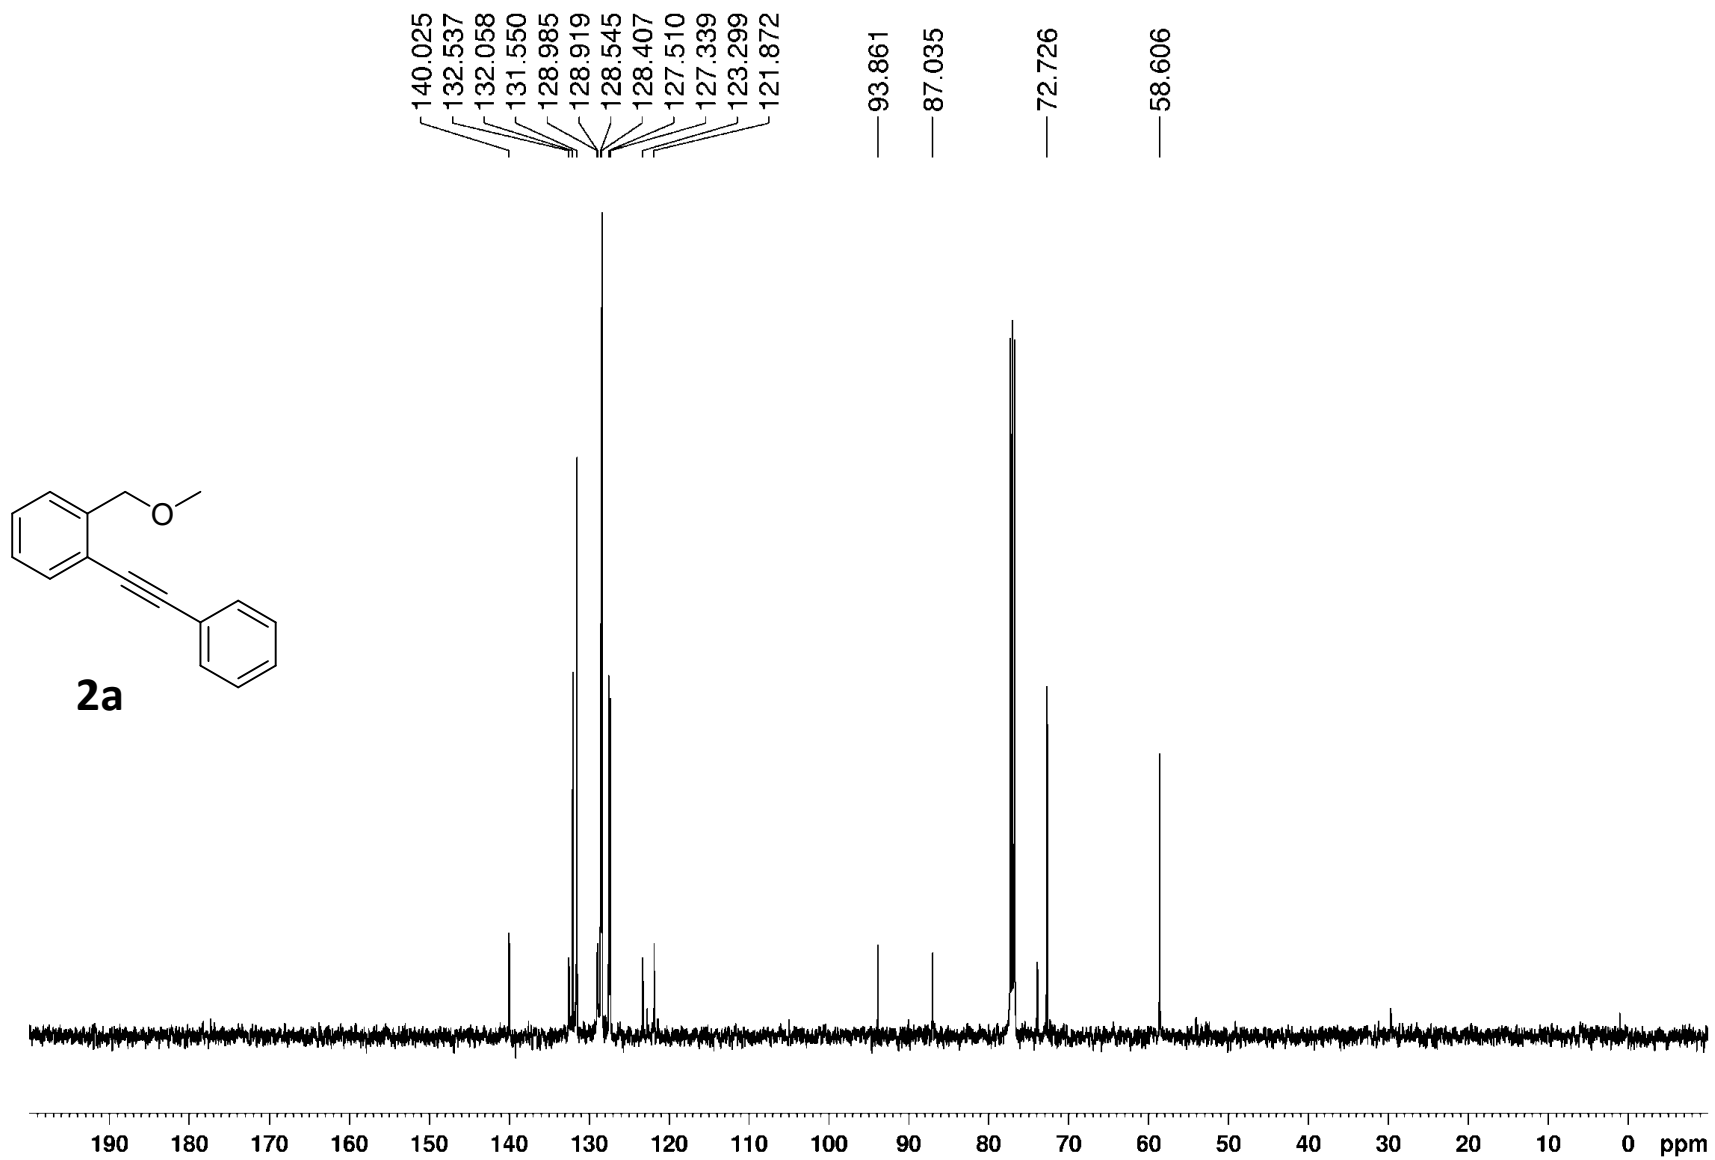

$^{13}\text{C}\{^1\text{H}\}$  NMR of compound **2a** (75 MHz,  $\text{CDCl}_3$ )

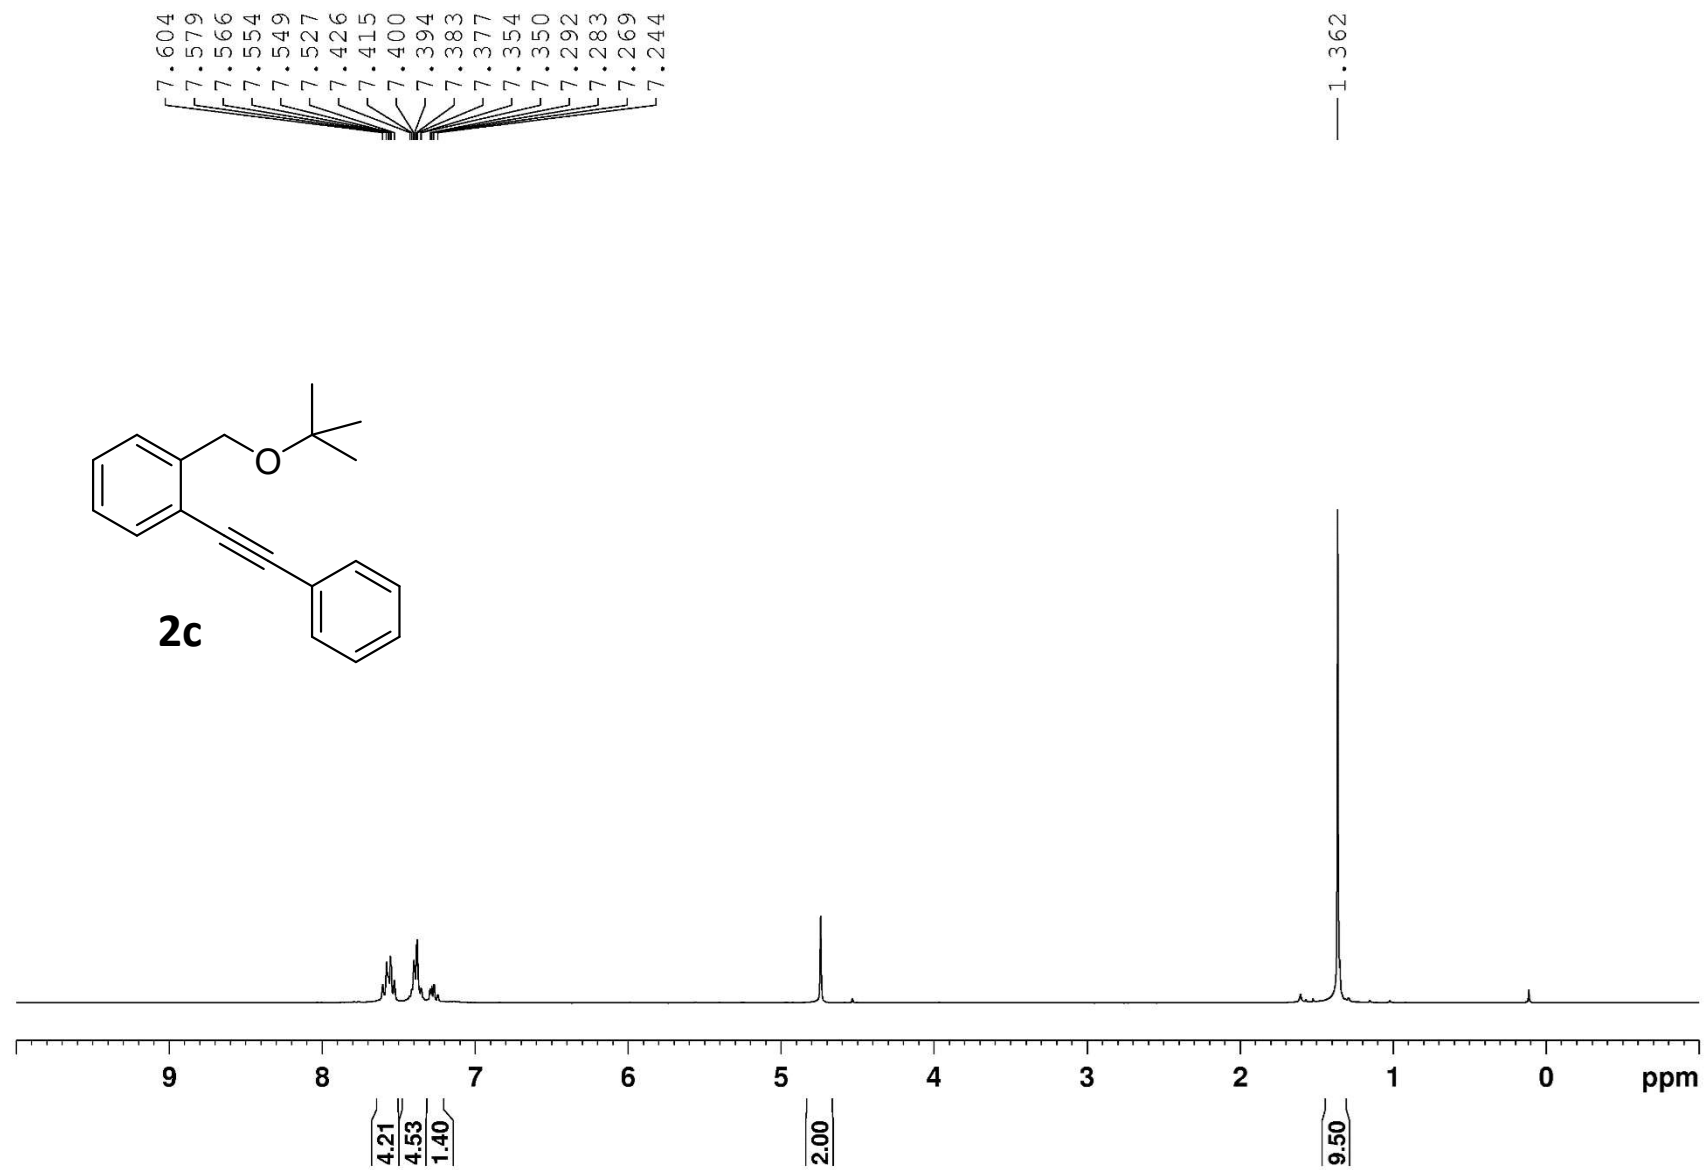

$^1\text{H}$  NMR of compound **2c** (300 MHz,  $\text{CDCl}_3$ )

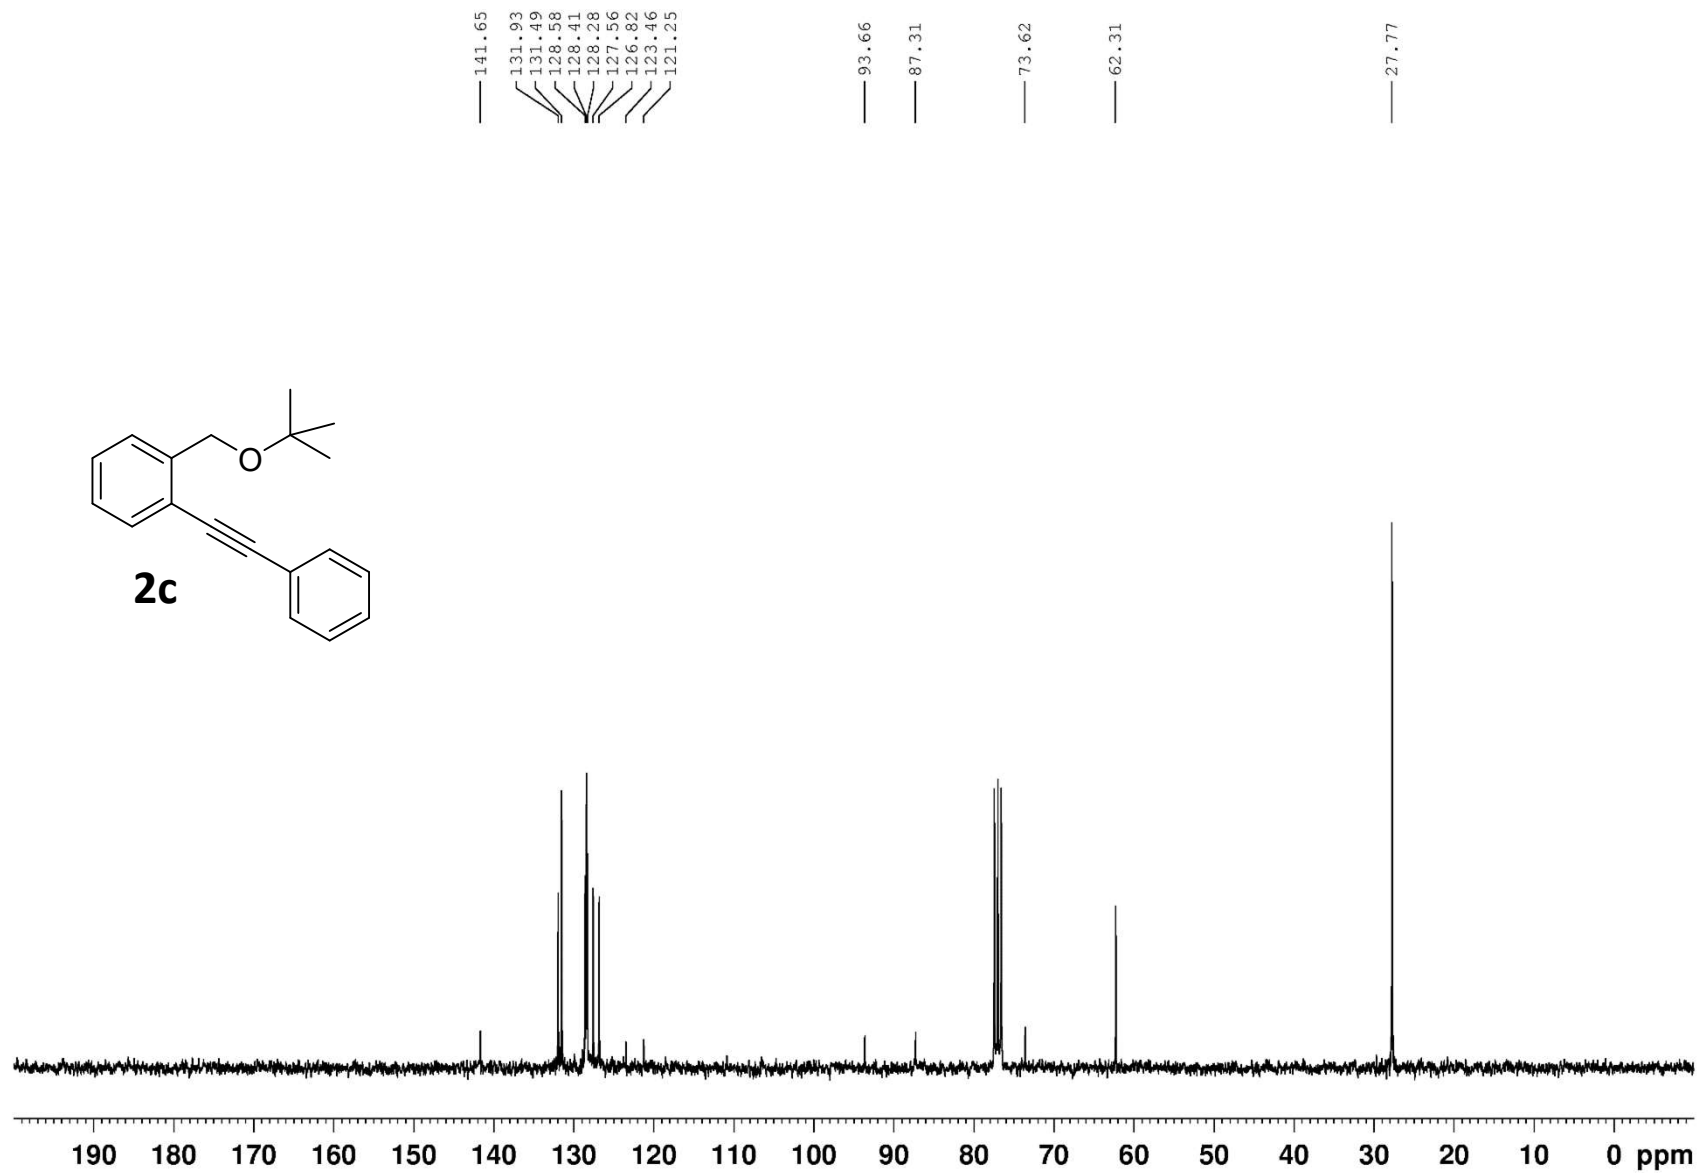

$^{13}\text{C}\{^1\text{H}\}$  NMR of compound **2c** (75 MHz,  $\text{CDCl}_3$ )

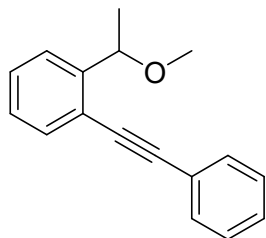

**2d**

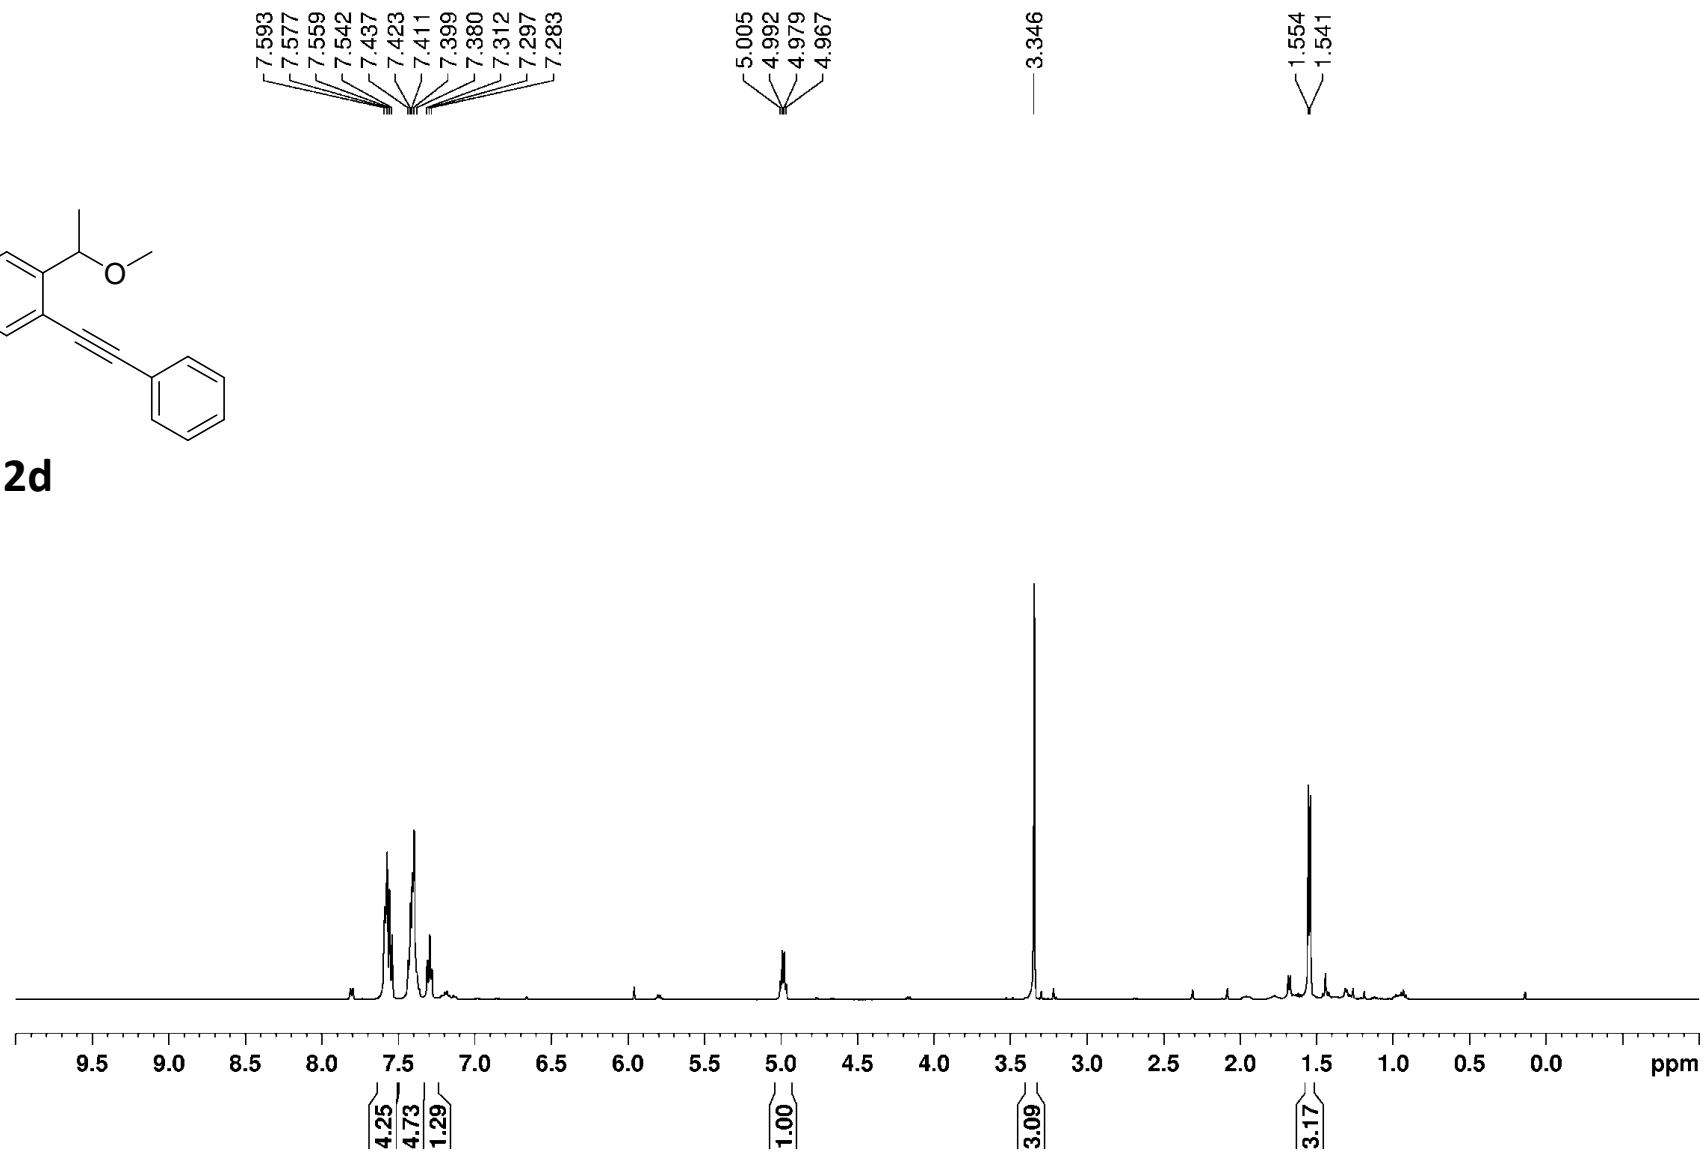

$^1\text{H}$  NMR of compound **2d** (500 MHz,  $\text{CDCl}_3$ )

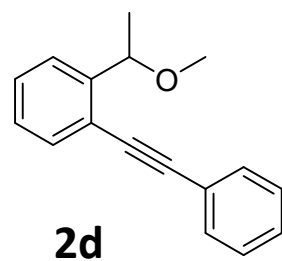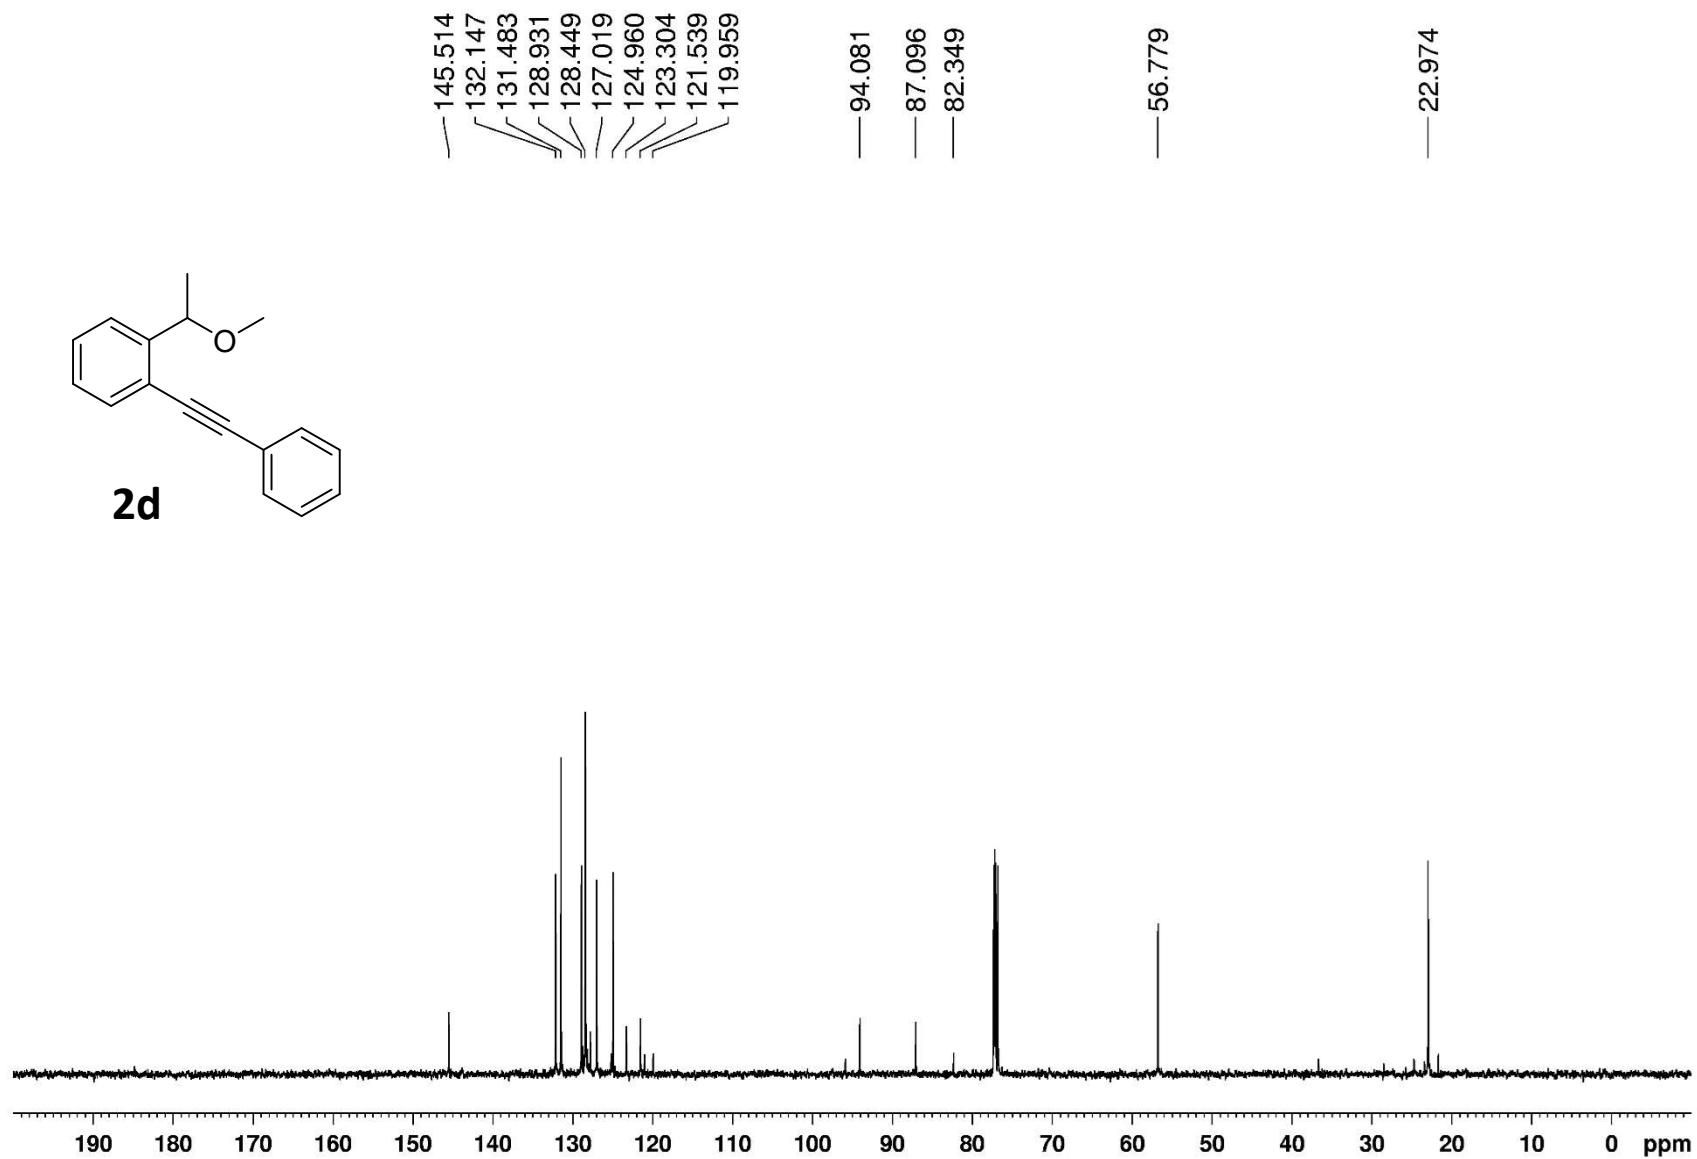

$^{13}\text{C}\{^1\text{H}\}$  NMR of compound **2d** (126 MHz,  $\text{CDCl}_3$ )



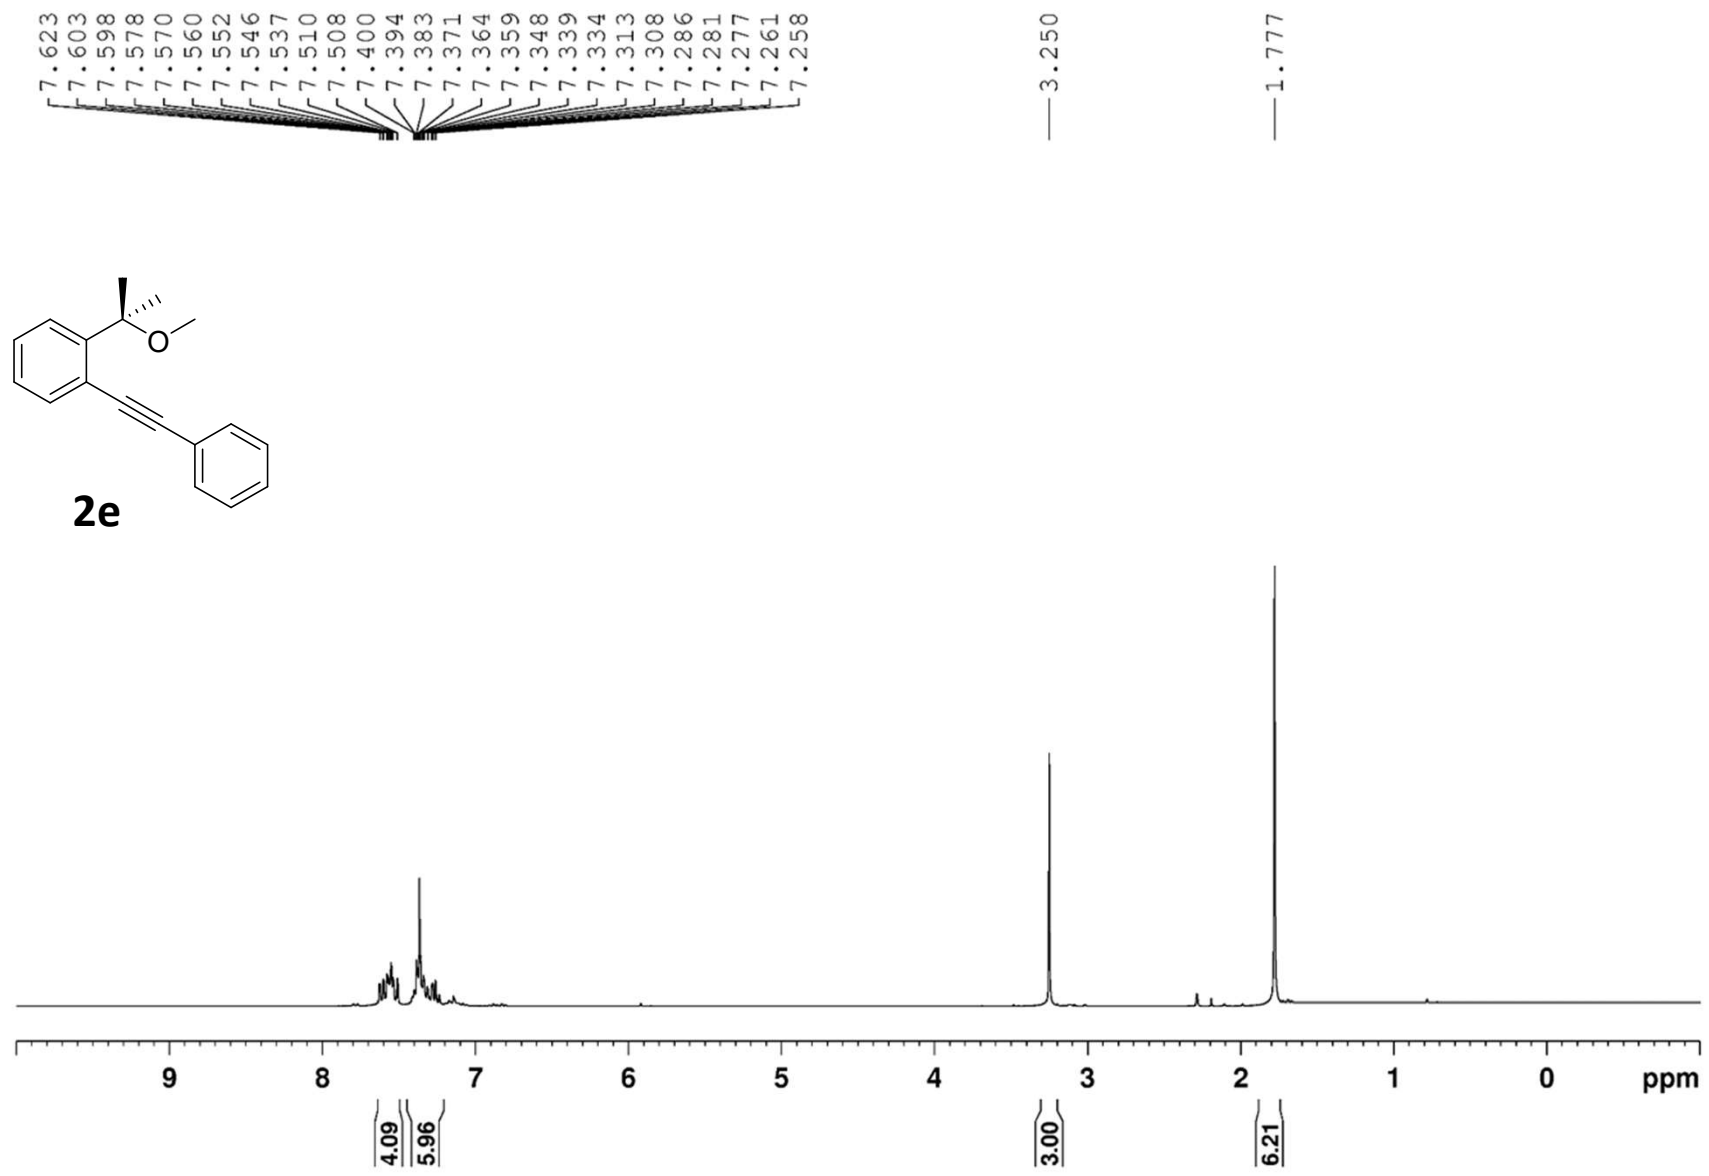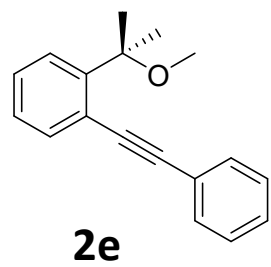

<sup>1</sup>H NMR of compound **2e** (300 MHz, CDCl<sub>3</sub>)

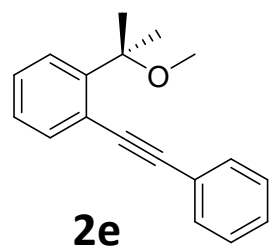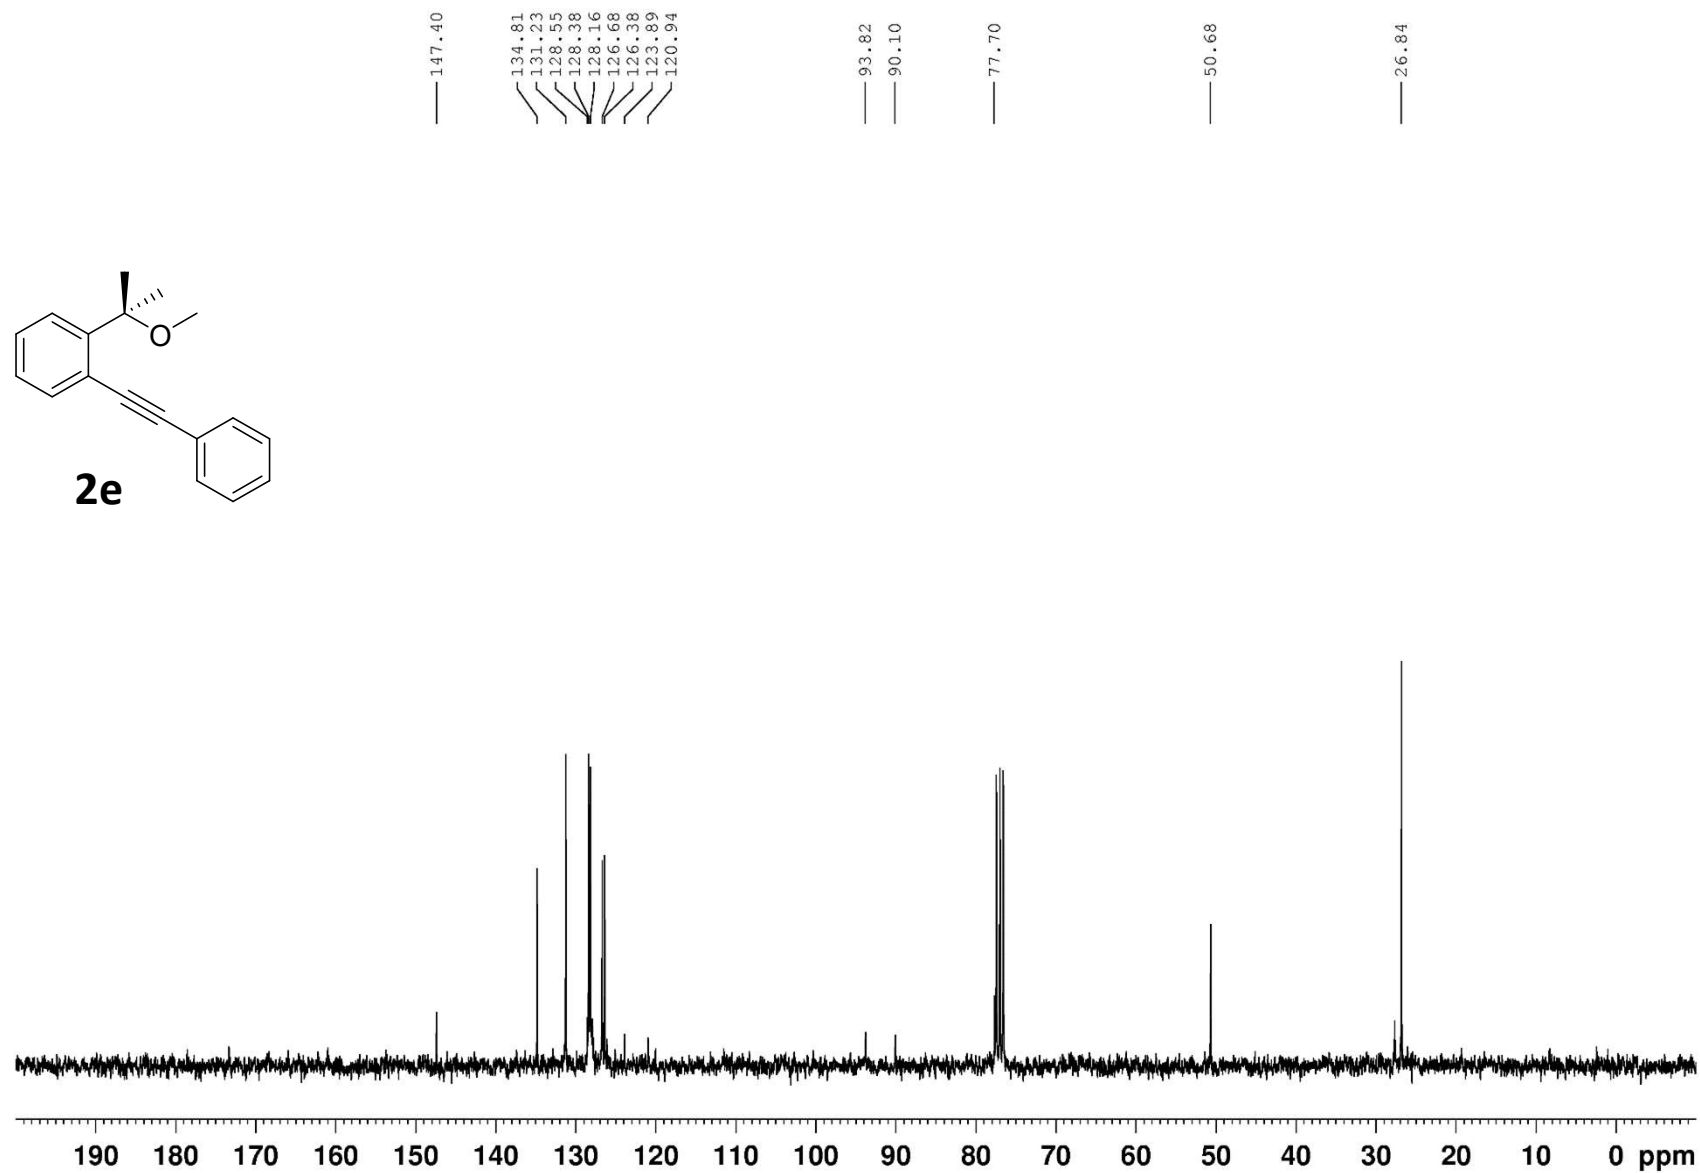

$^{13}\text{C}\{^1\text{H}\}$  NMR of compound **2e** (75 MHz,  $\text{CDCl}_3$ )

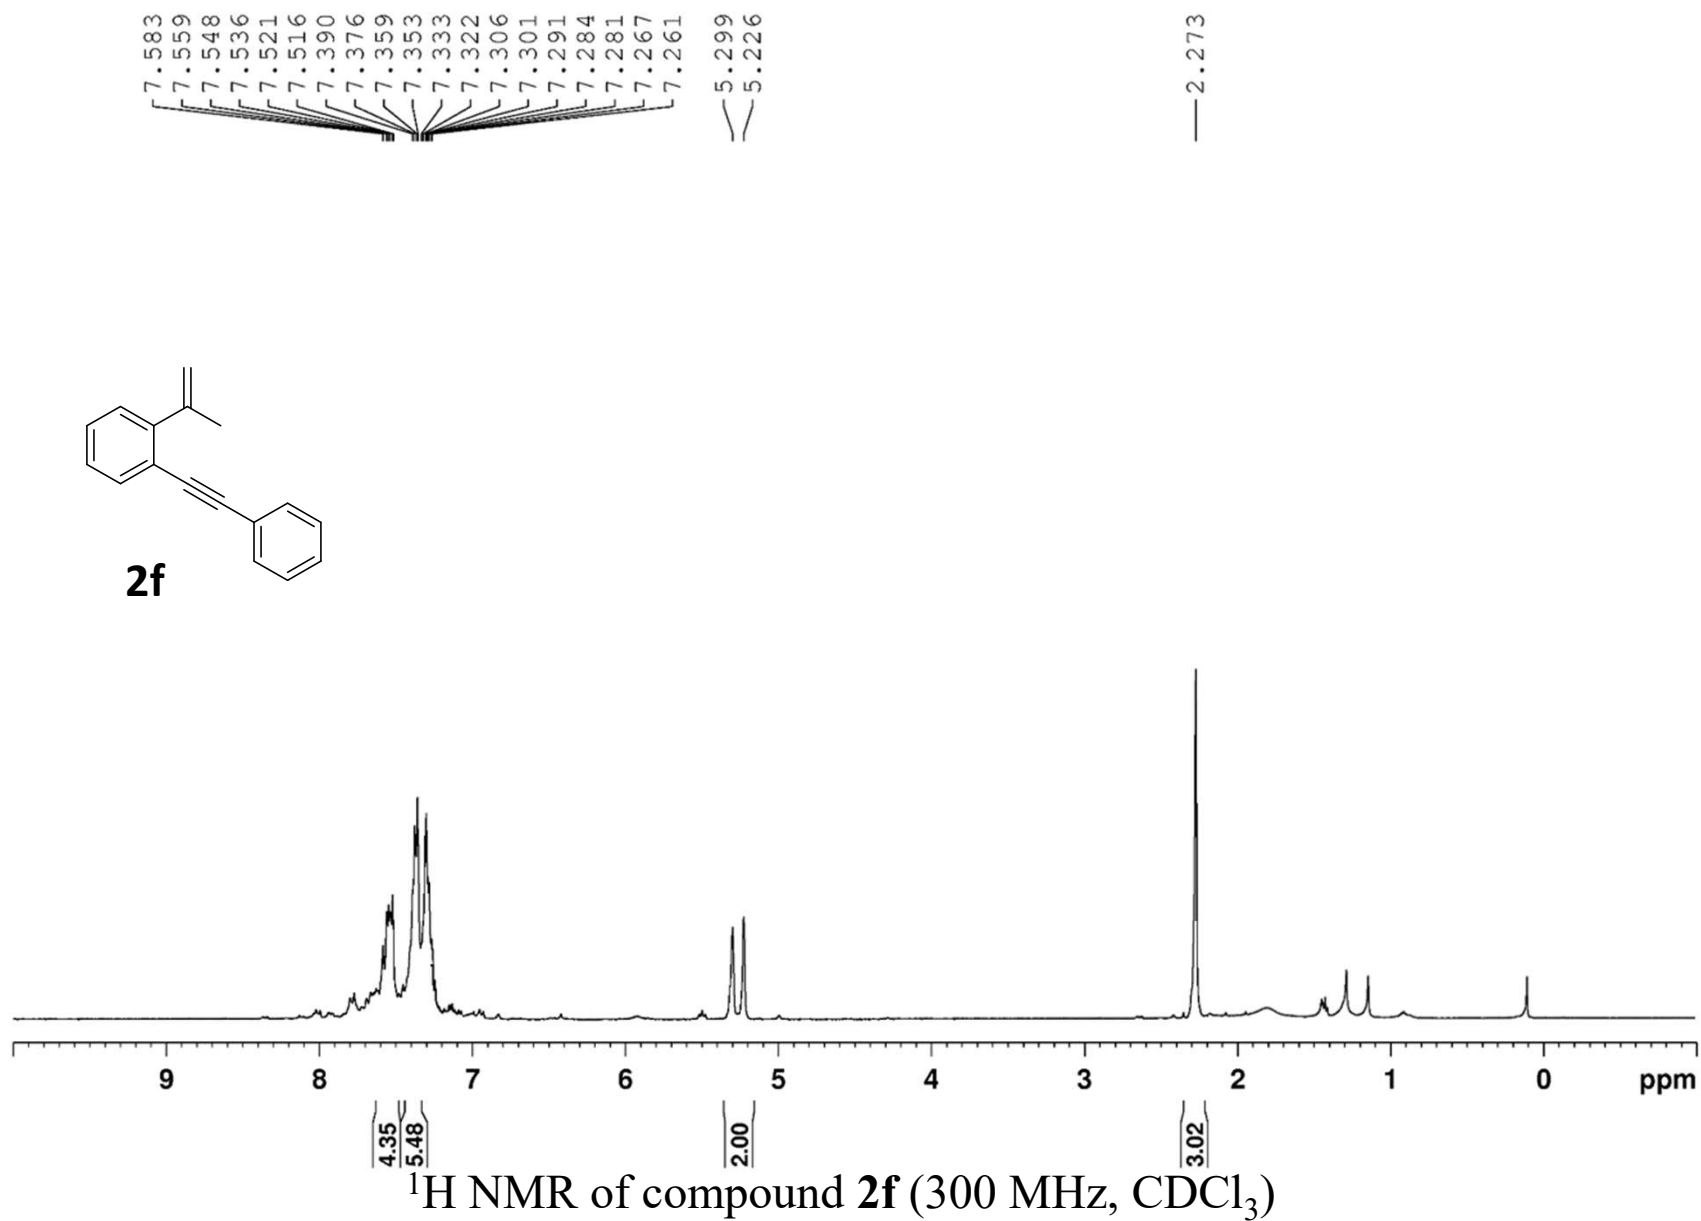

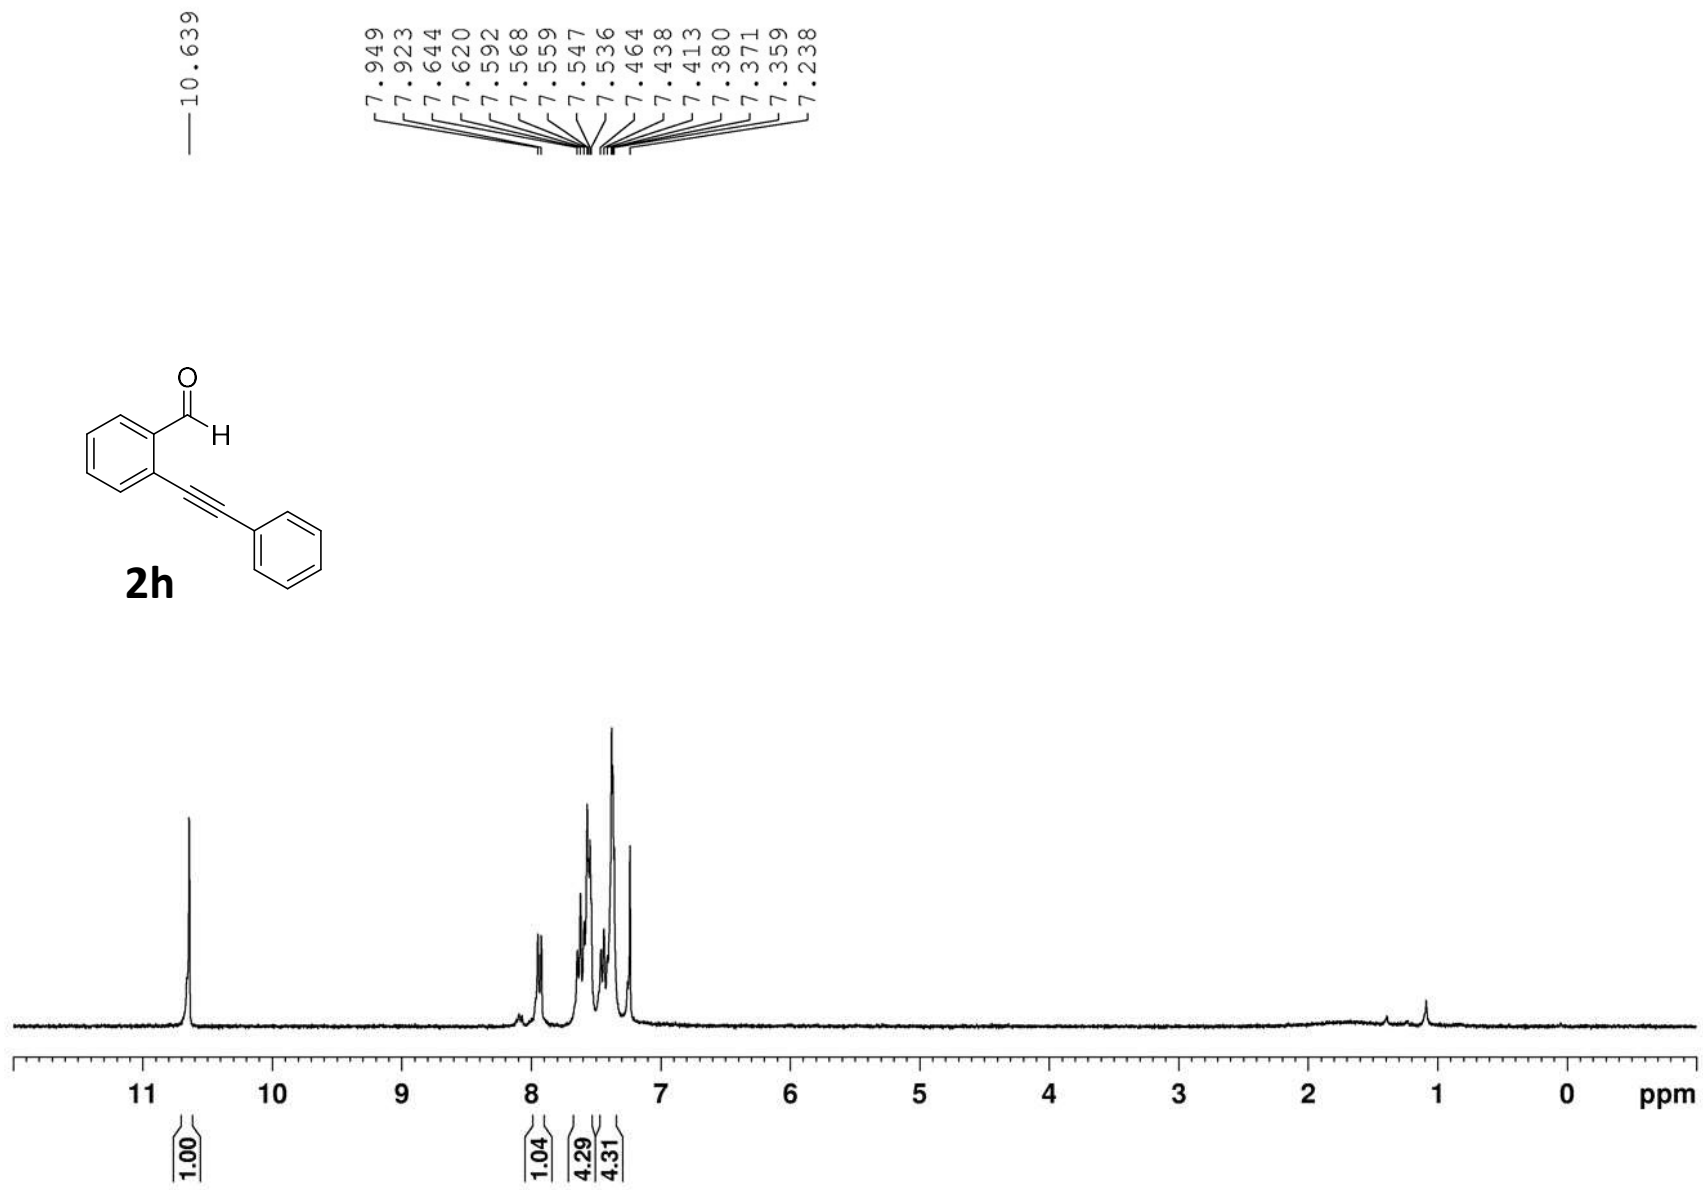

$^1\text{H}$  NMR of compound **2h** (300 MHz,  $\text{CDCl}_3$ )

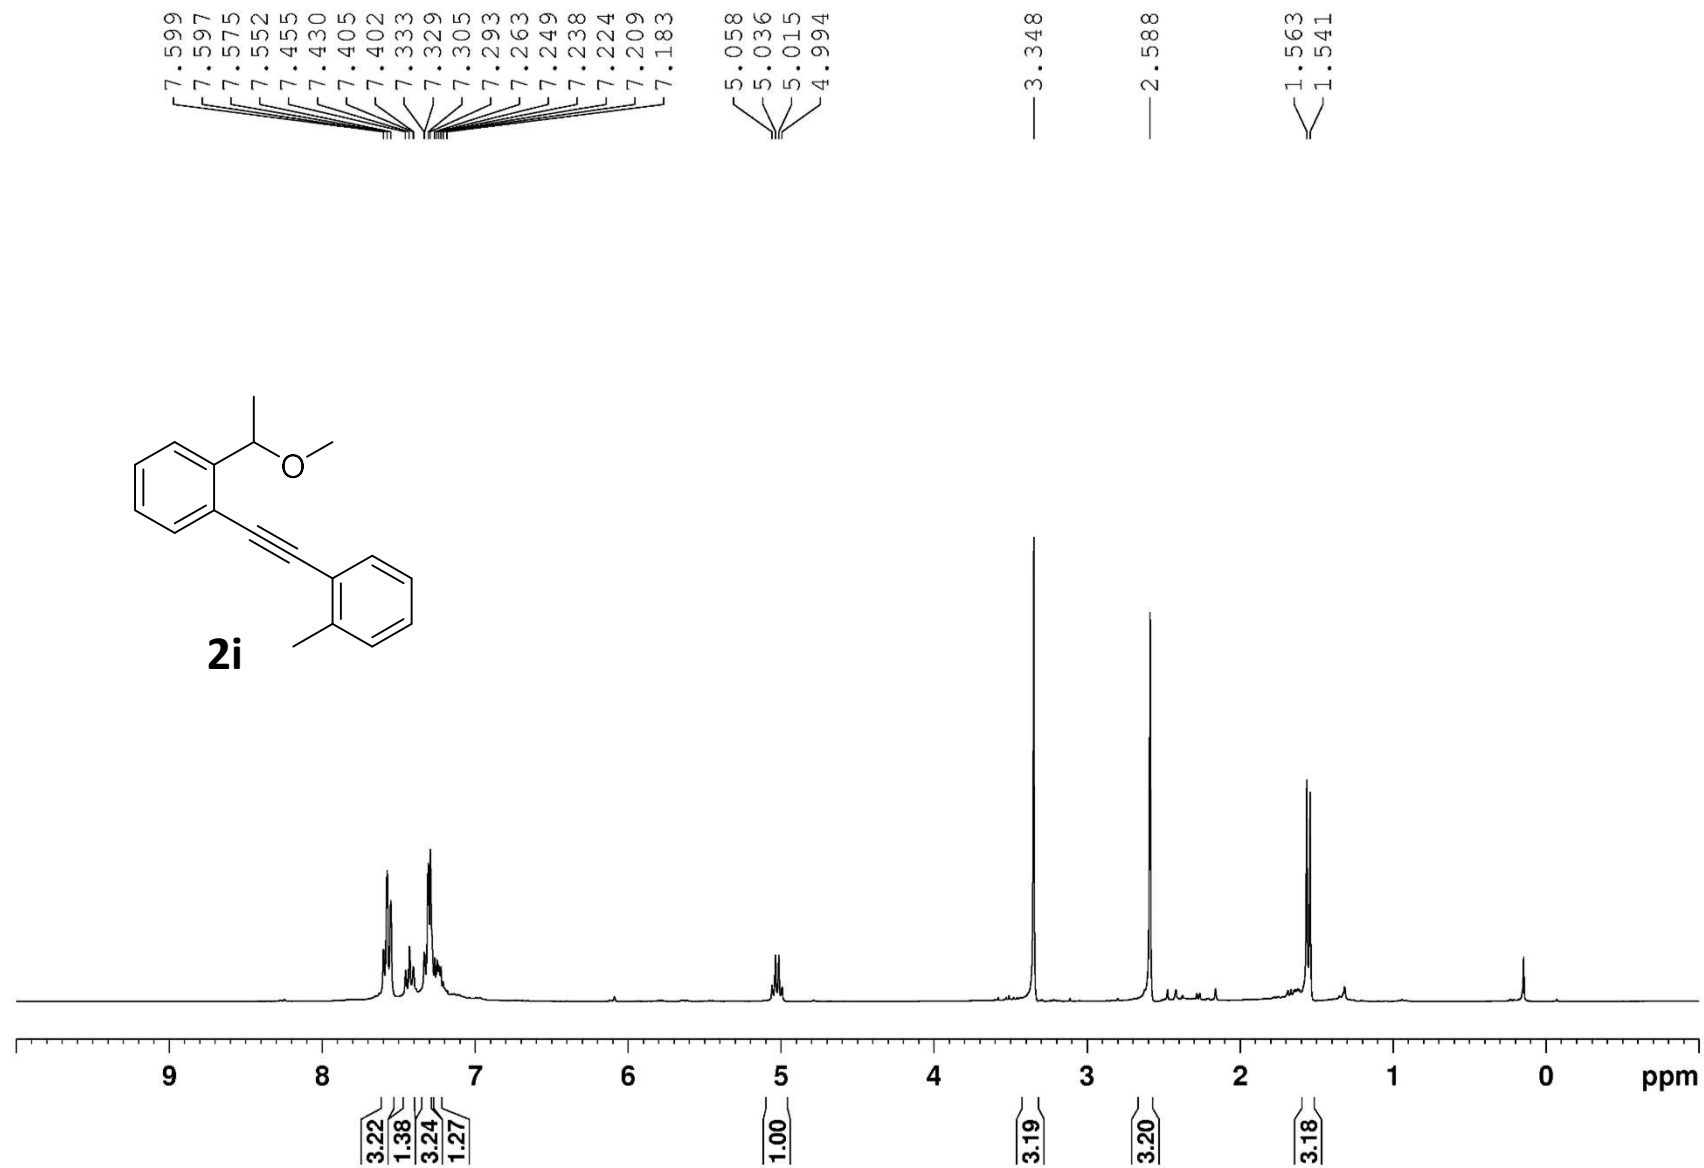

$^1\text{H}$  NMR of compound **2i** (300 MHz,  $\text{CDCl}_3$ )

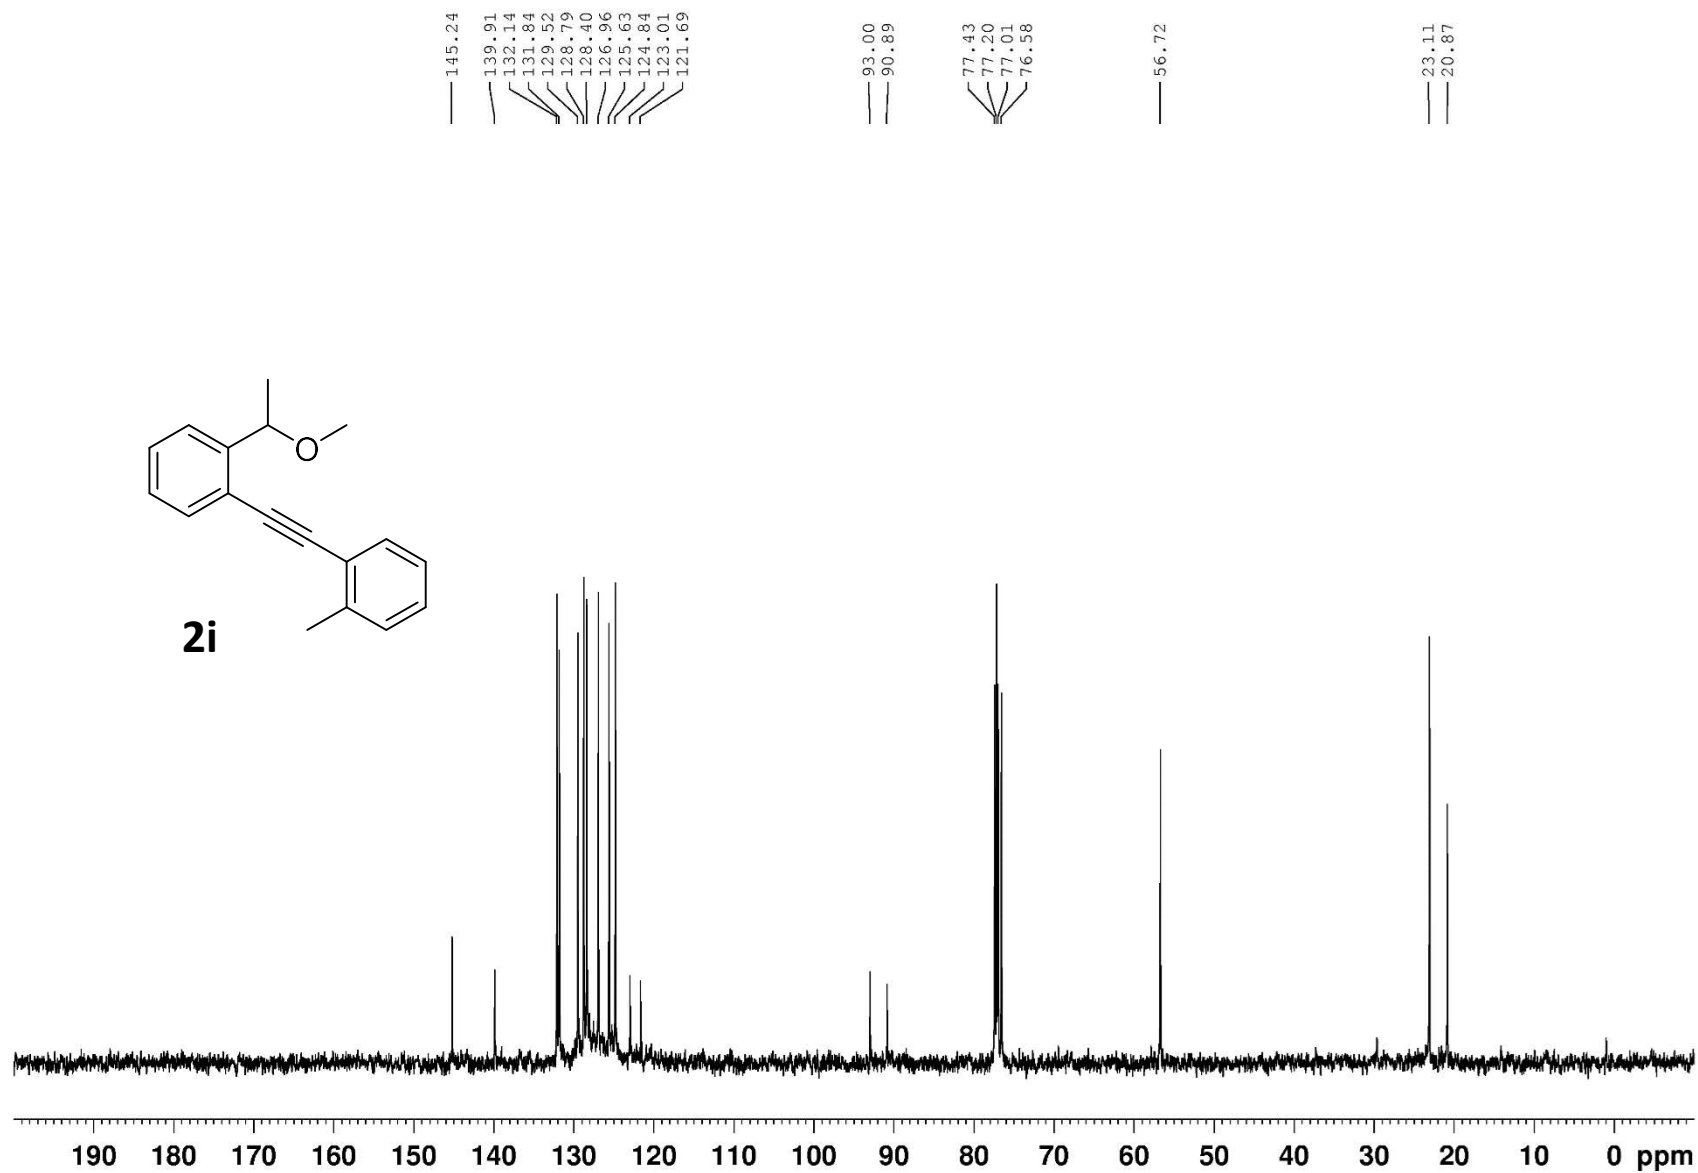

$^{13}\text{C}\{^1\text{H}\}$  NMR of compound **2i** (75 MHz,  $\text{CDCl}_3$ )

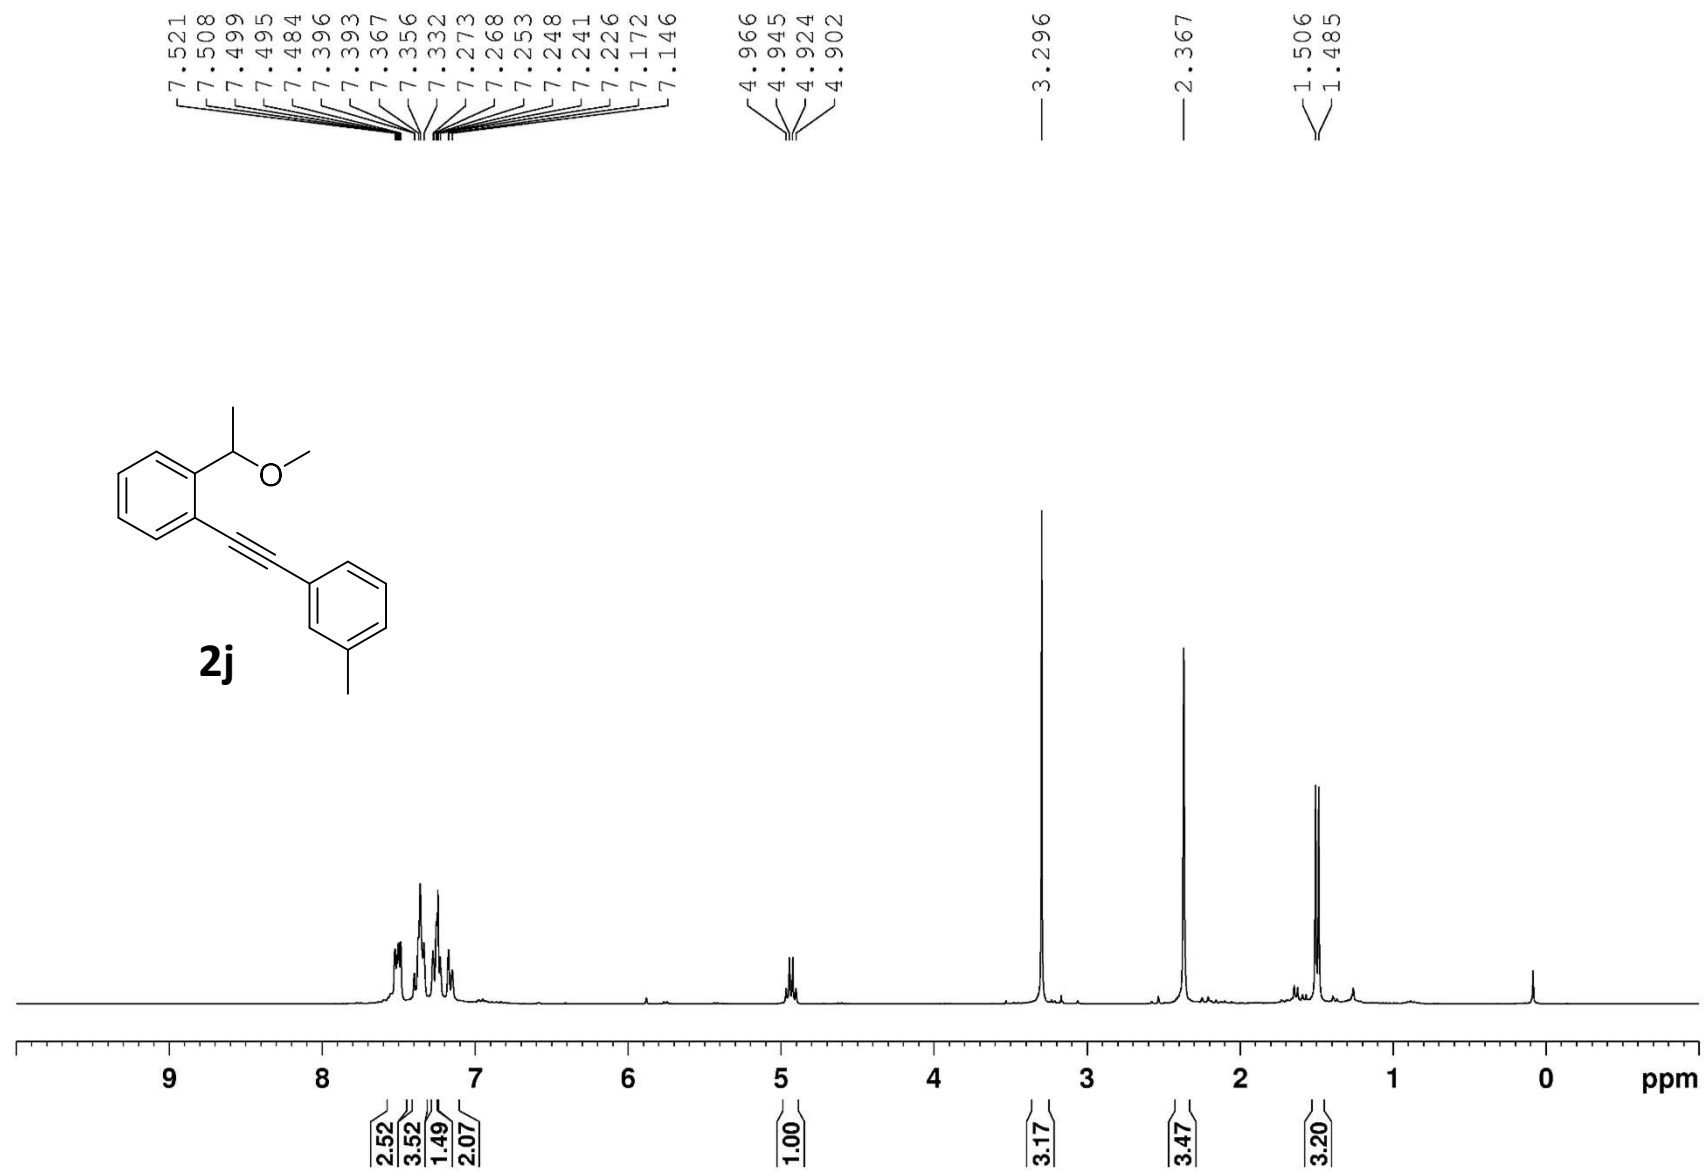

$^1\text{H}$  NMR of compound **2j** (300 MHz,  $\text{CDCl}_3$ )

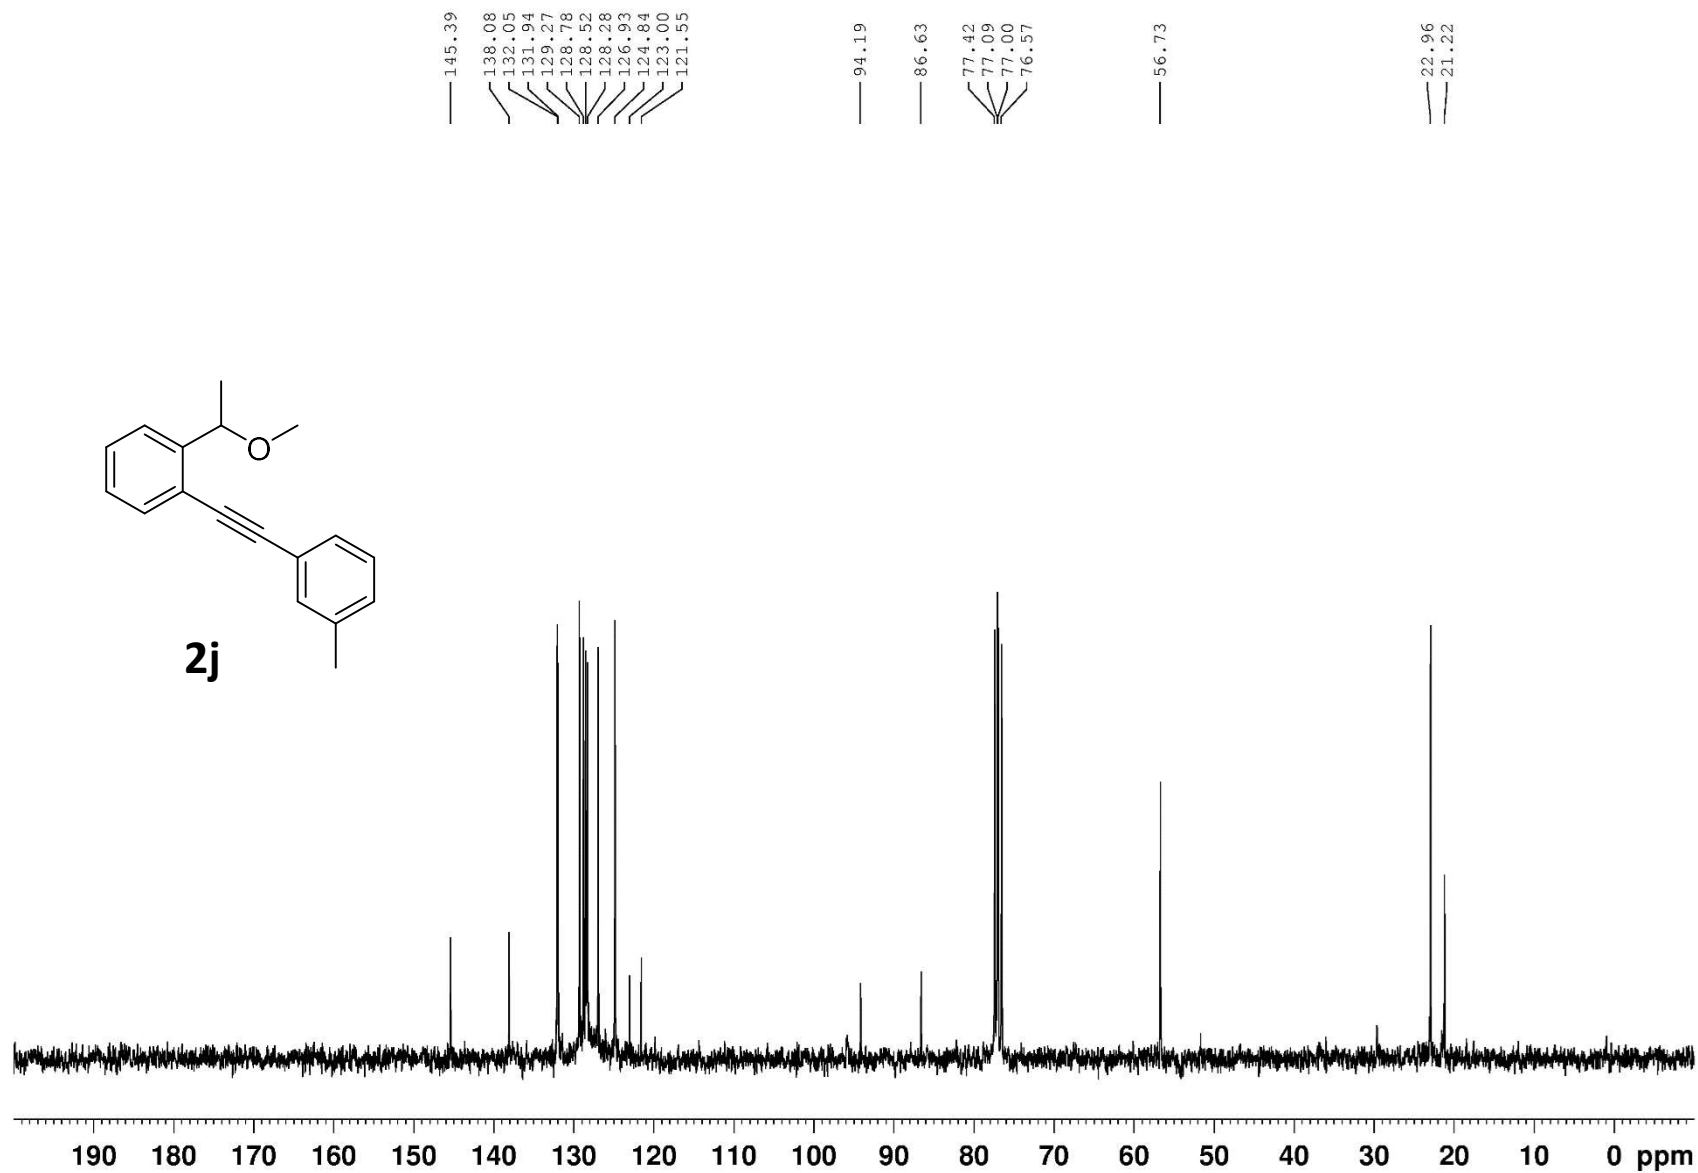

$^{13}\text{C}\{^1\text{H}\}$  NMR of compound **2j** (75 MHz,  $\text{CDCl}_3$ )



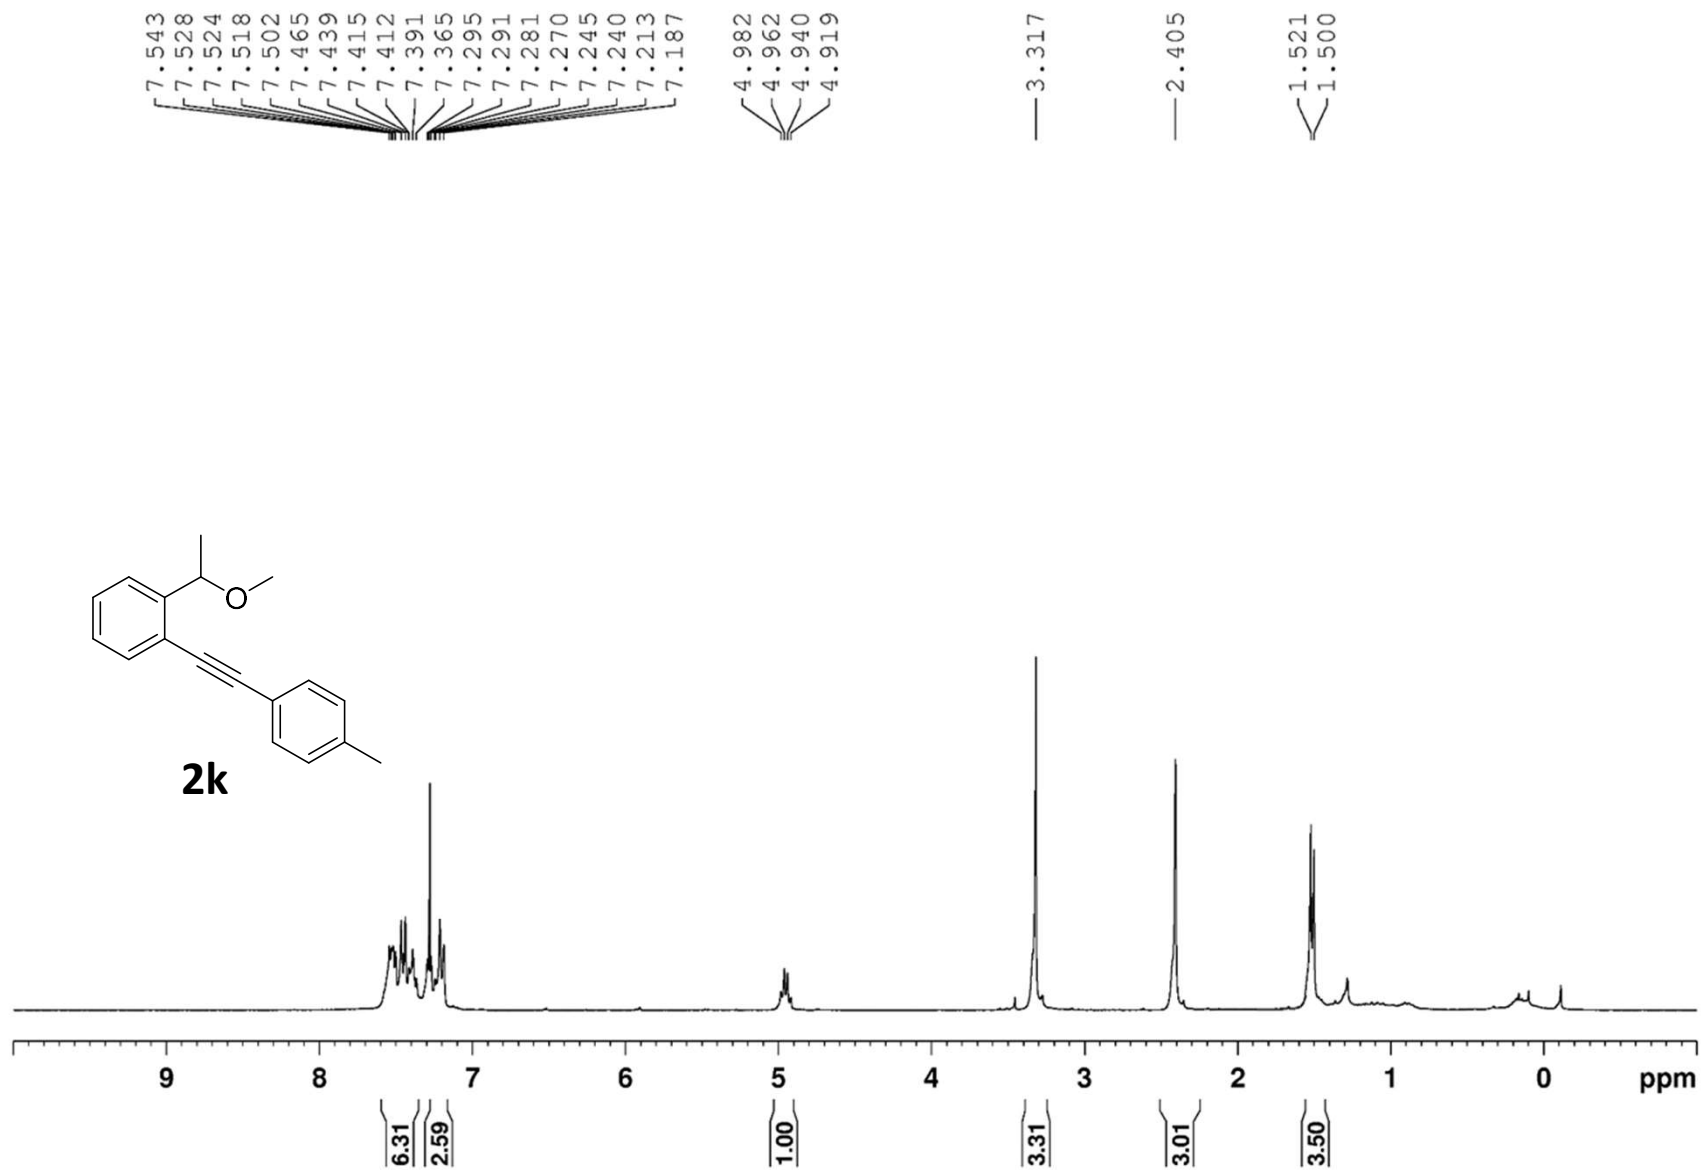

<sup>1</sup>H NMR of compound **2k** (300 MHz, CDCl<sub>3</sub>)

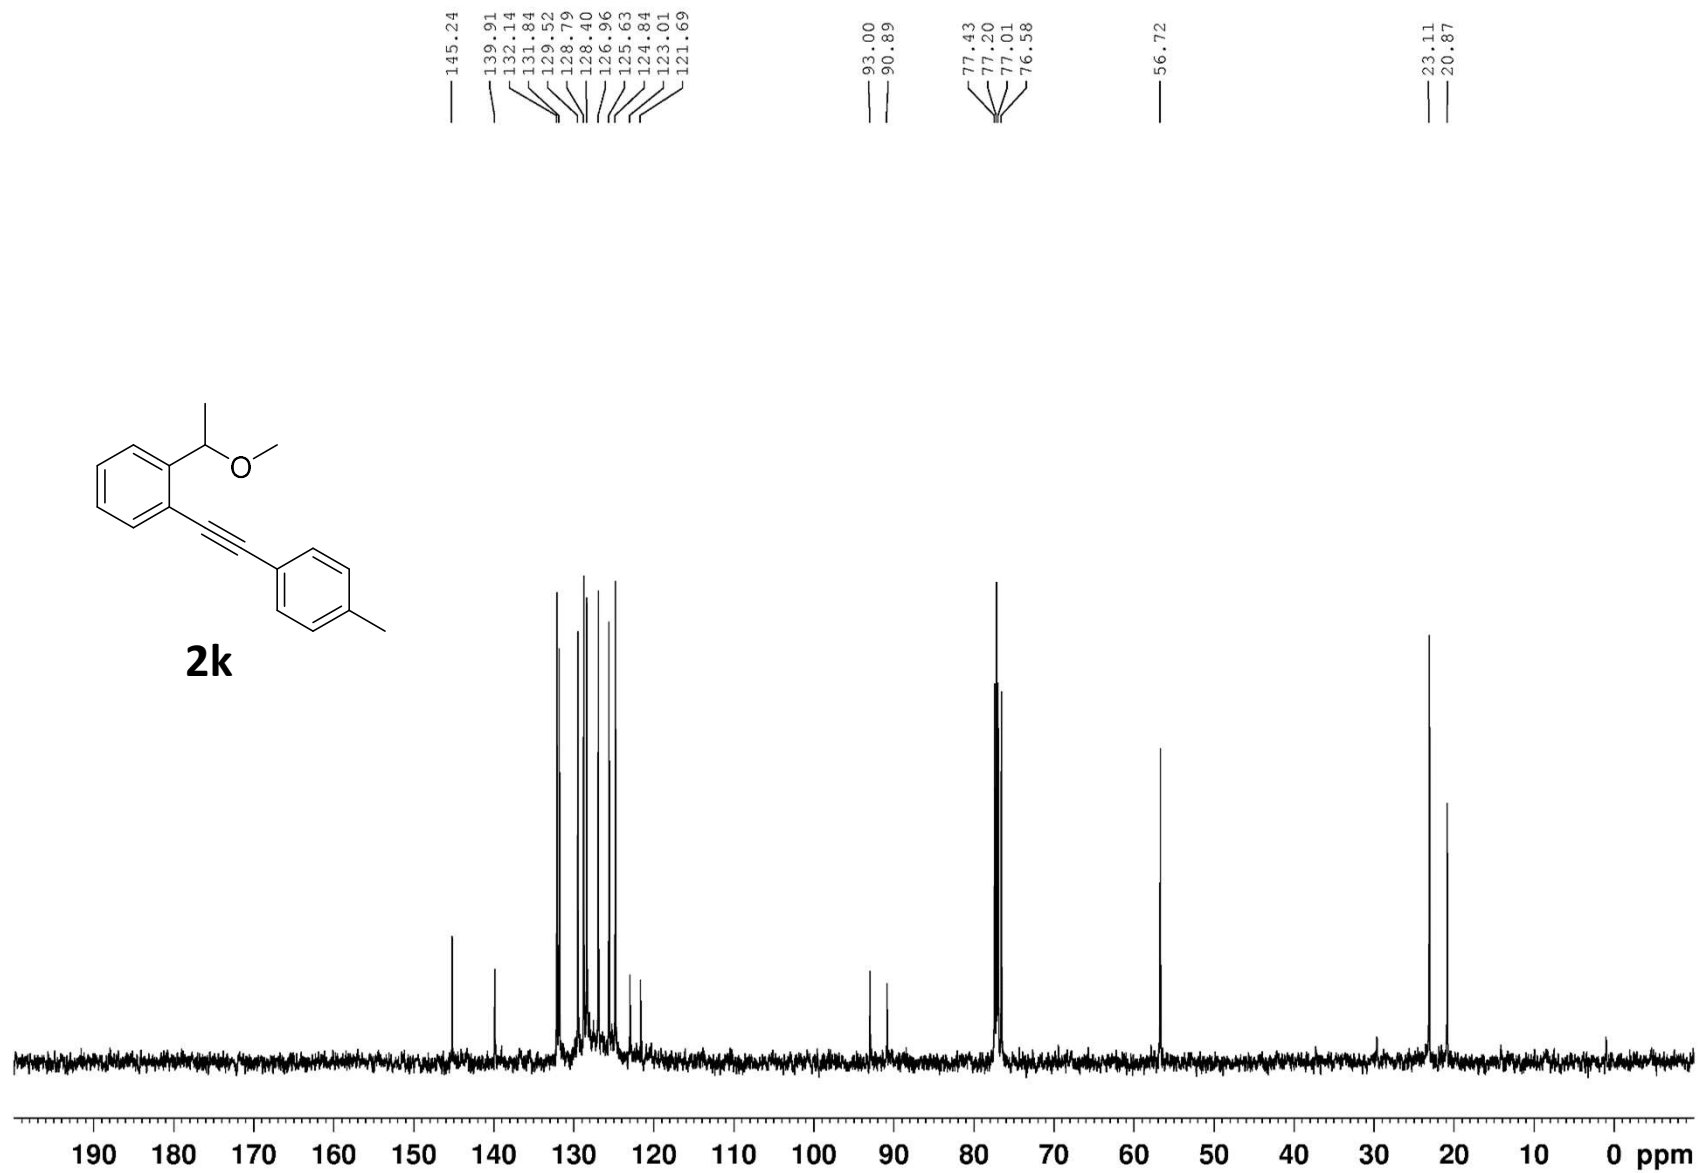

$^{13}\text{C}\{^1\text{H}\}$  NMR of compound **2k** (75 MHz,  $\text{CDCl}_3$ )

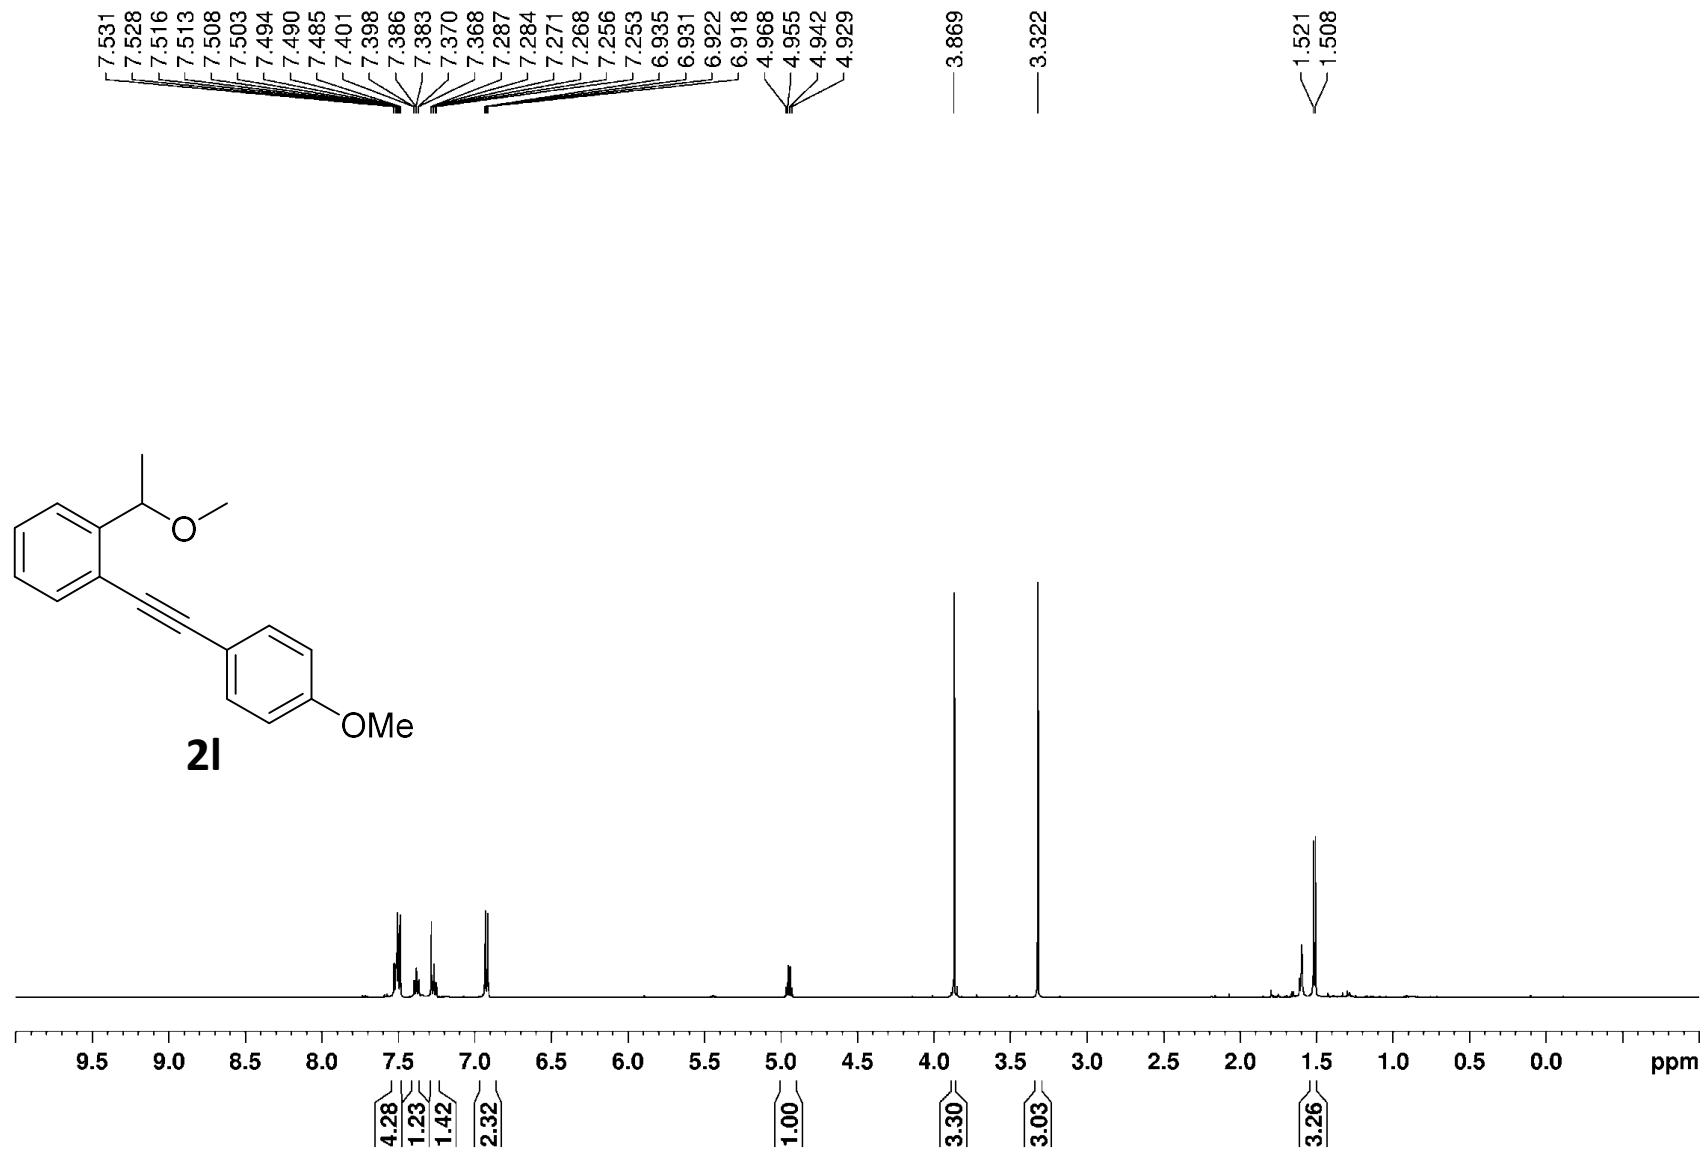

<sup>1</sup>H NMR of compound **21** (500 MHz, CDCl<sub>3</sub>)

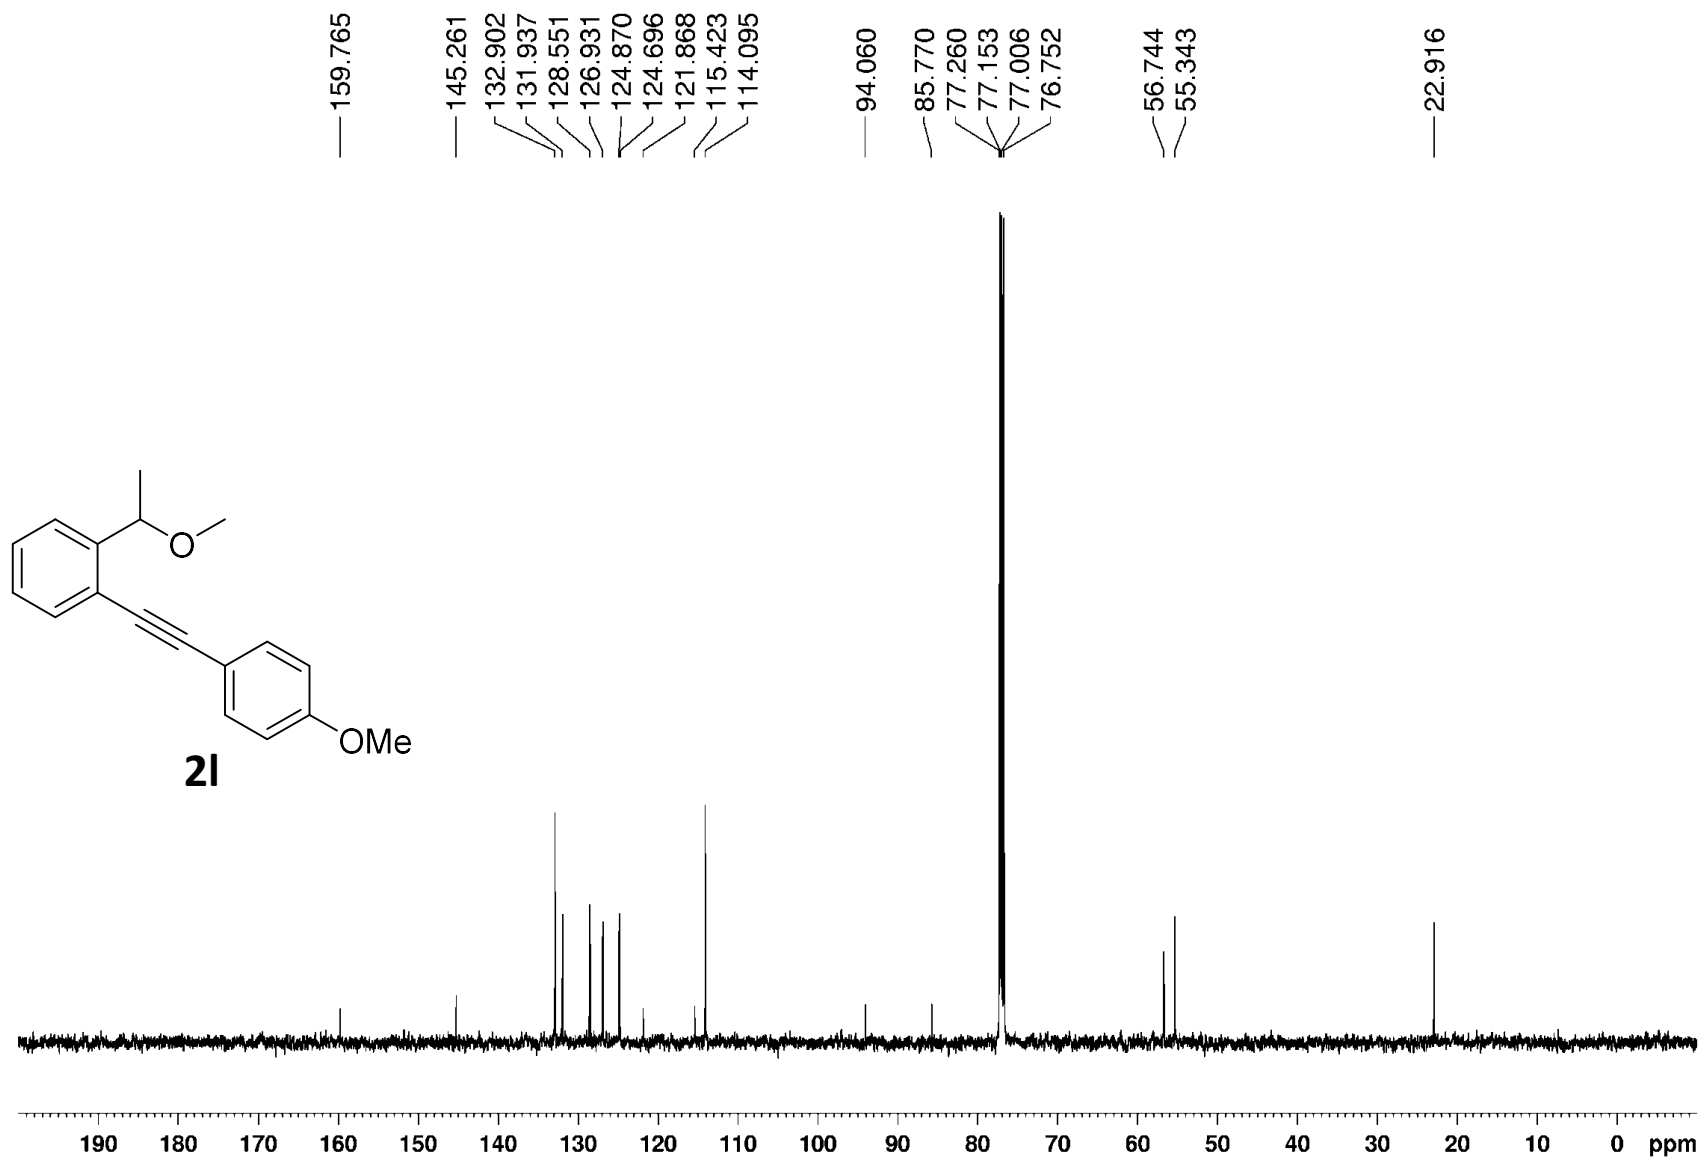

$^{13}\text{C}\{^1\text{H}\}$  NMR of compound **21** (126 MHz,  $\text{CDCl}_3$ )

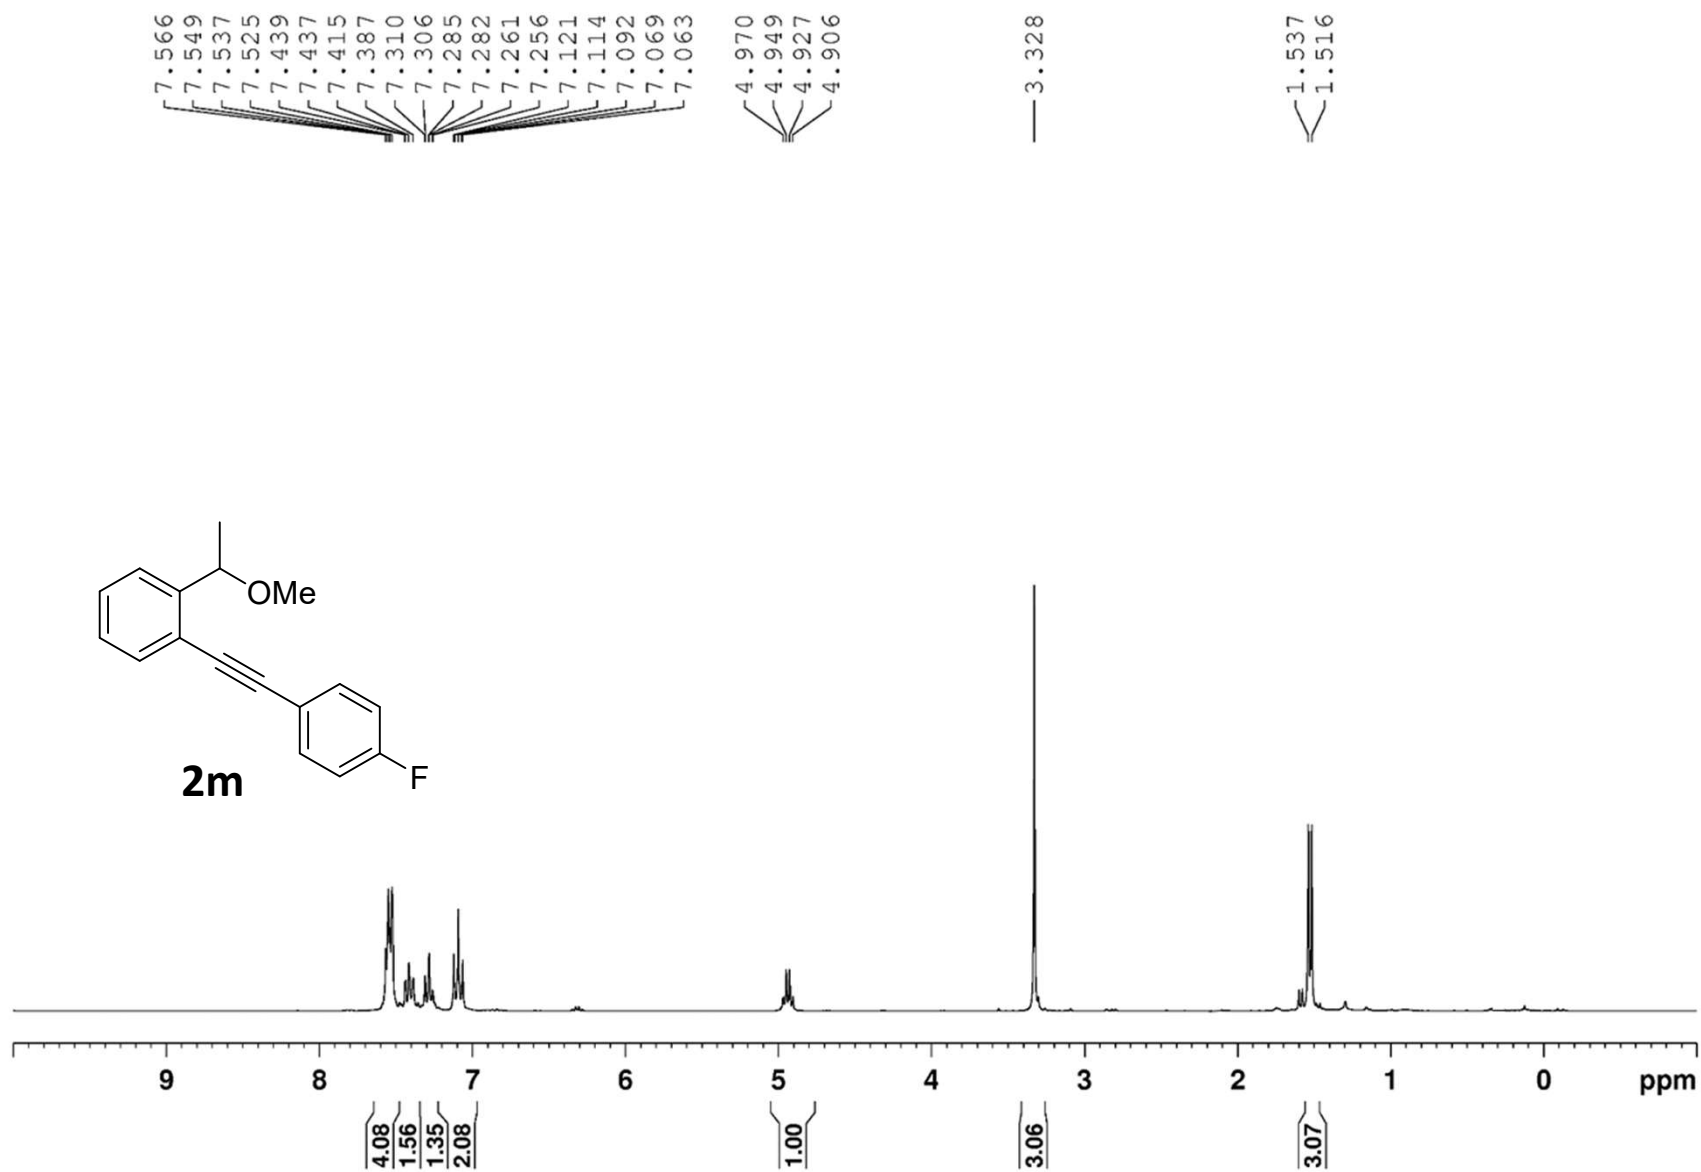

<sup>1</sup>H NMR of compound **2m** (500 MHz, CDCl<sub>3</sub>)

check 1me ome 4f cm

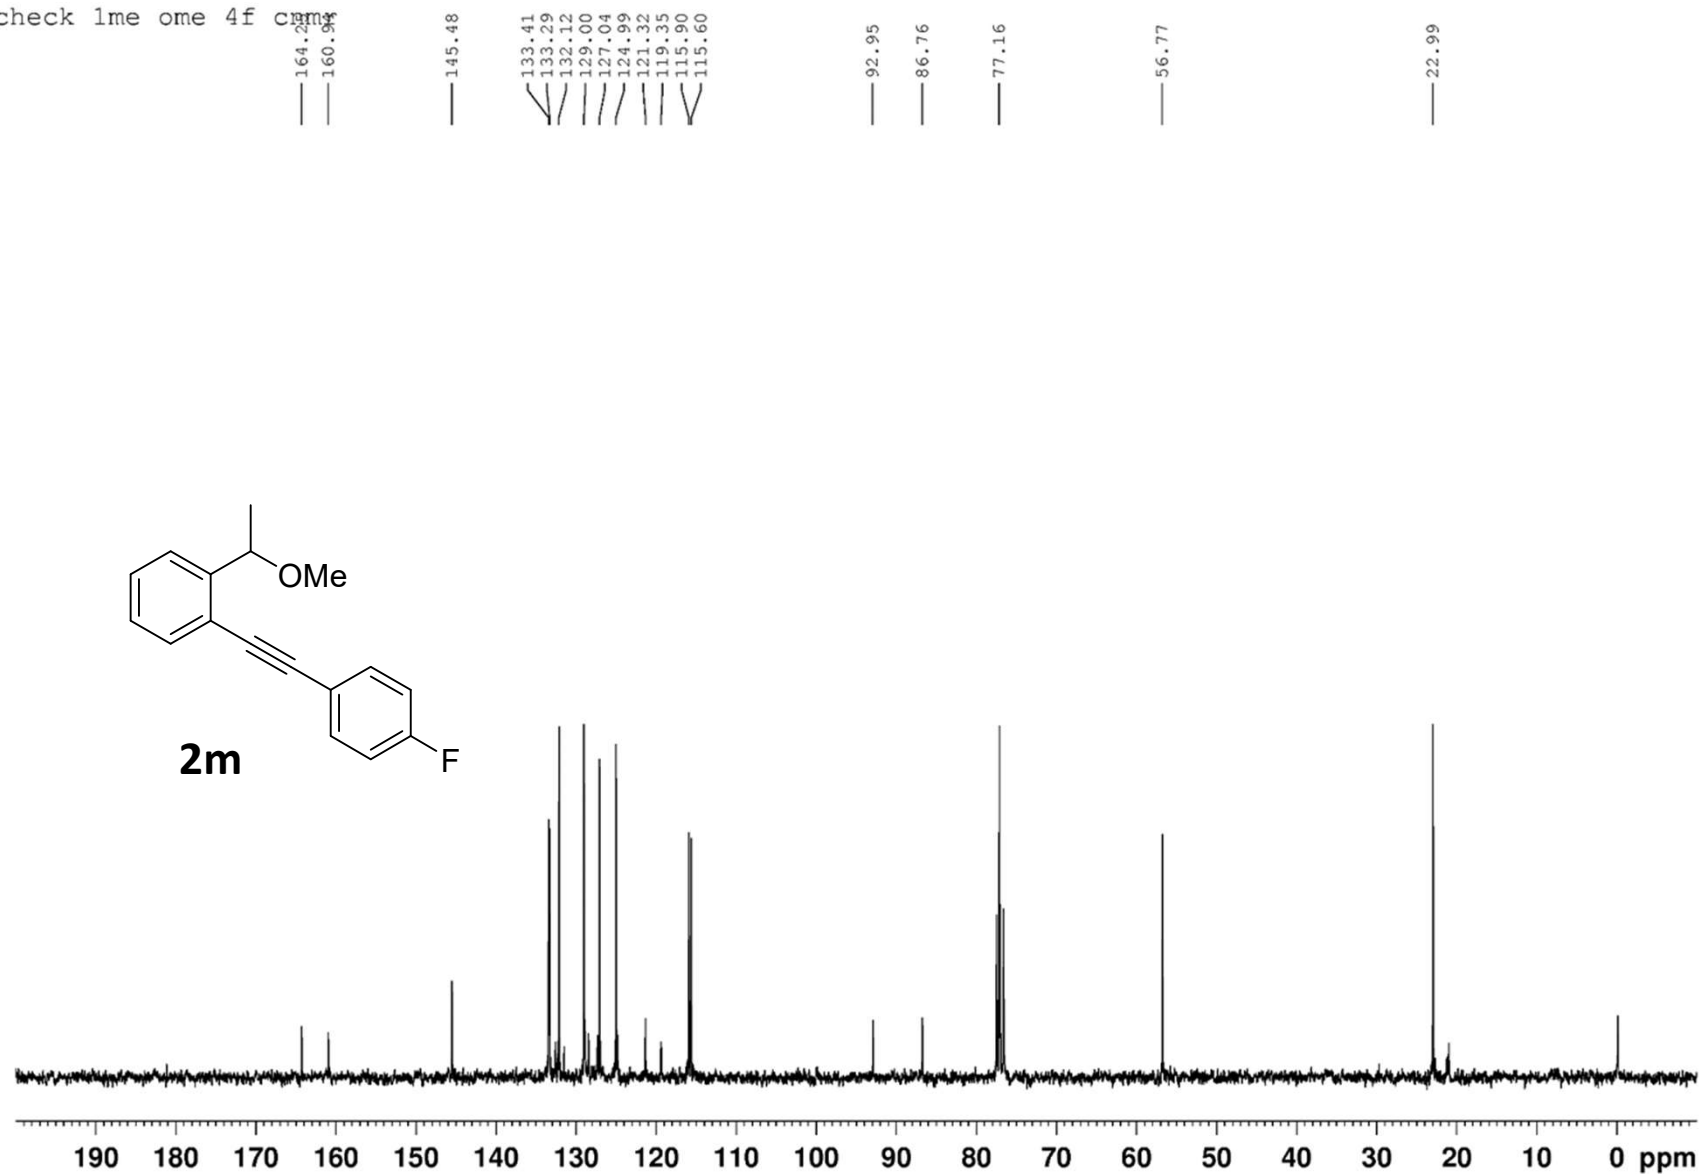

$^{13}\text{C}\{^1\text{H}\}$  NMR of compound **2m** (126 MHz,  $\text{CDCl}_3$ )

7.724  
7.701  
7.421  
7.395  
7.387  
7.366  
7.341  
7.314  
7.292  
7.282  
7.237  
7.202  
7.168  
7.145  
7.120  
7.084  
7.061  
7.038  
6.440  
— 5.203

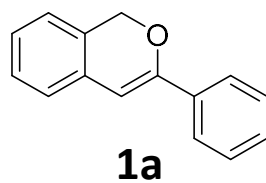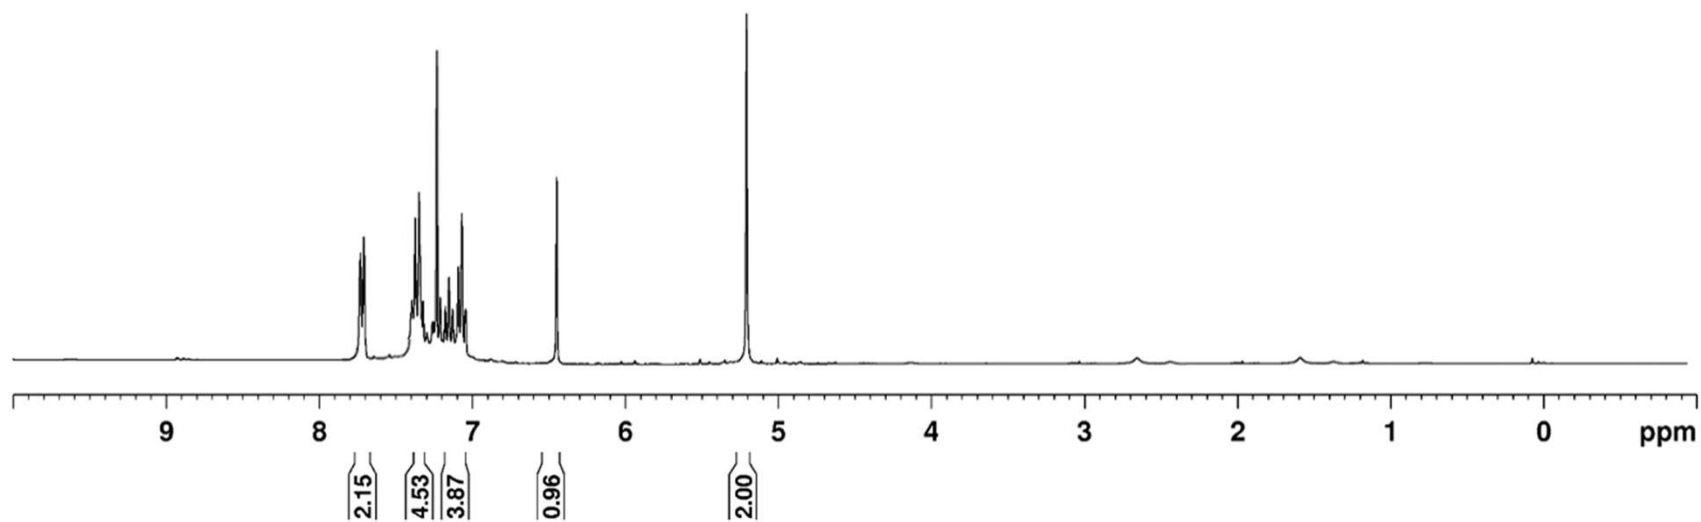

<sup>1</sup>H NMR of compound **1a** (300 MHz, CDCl<sub>3</sub>)

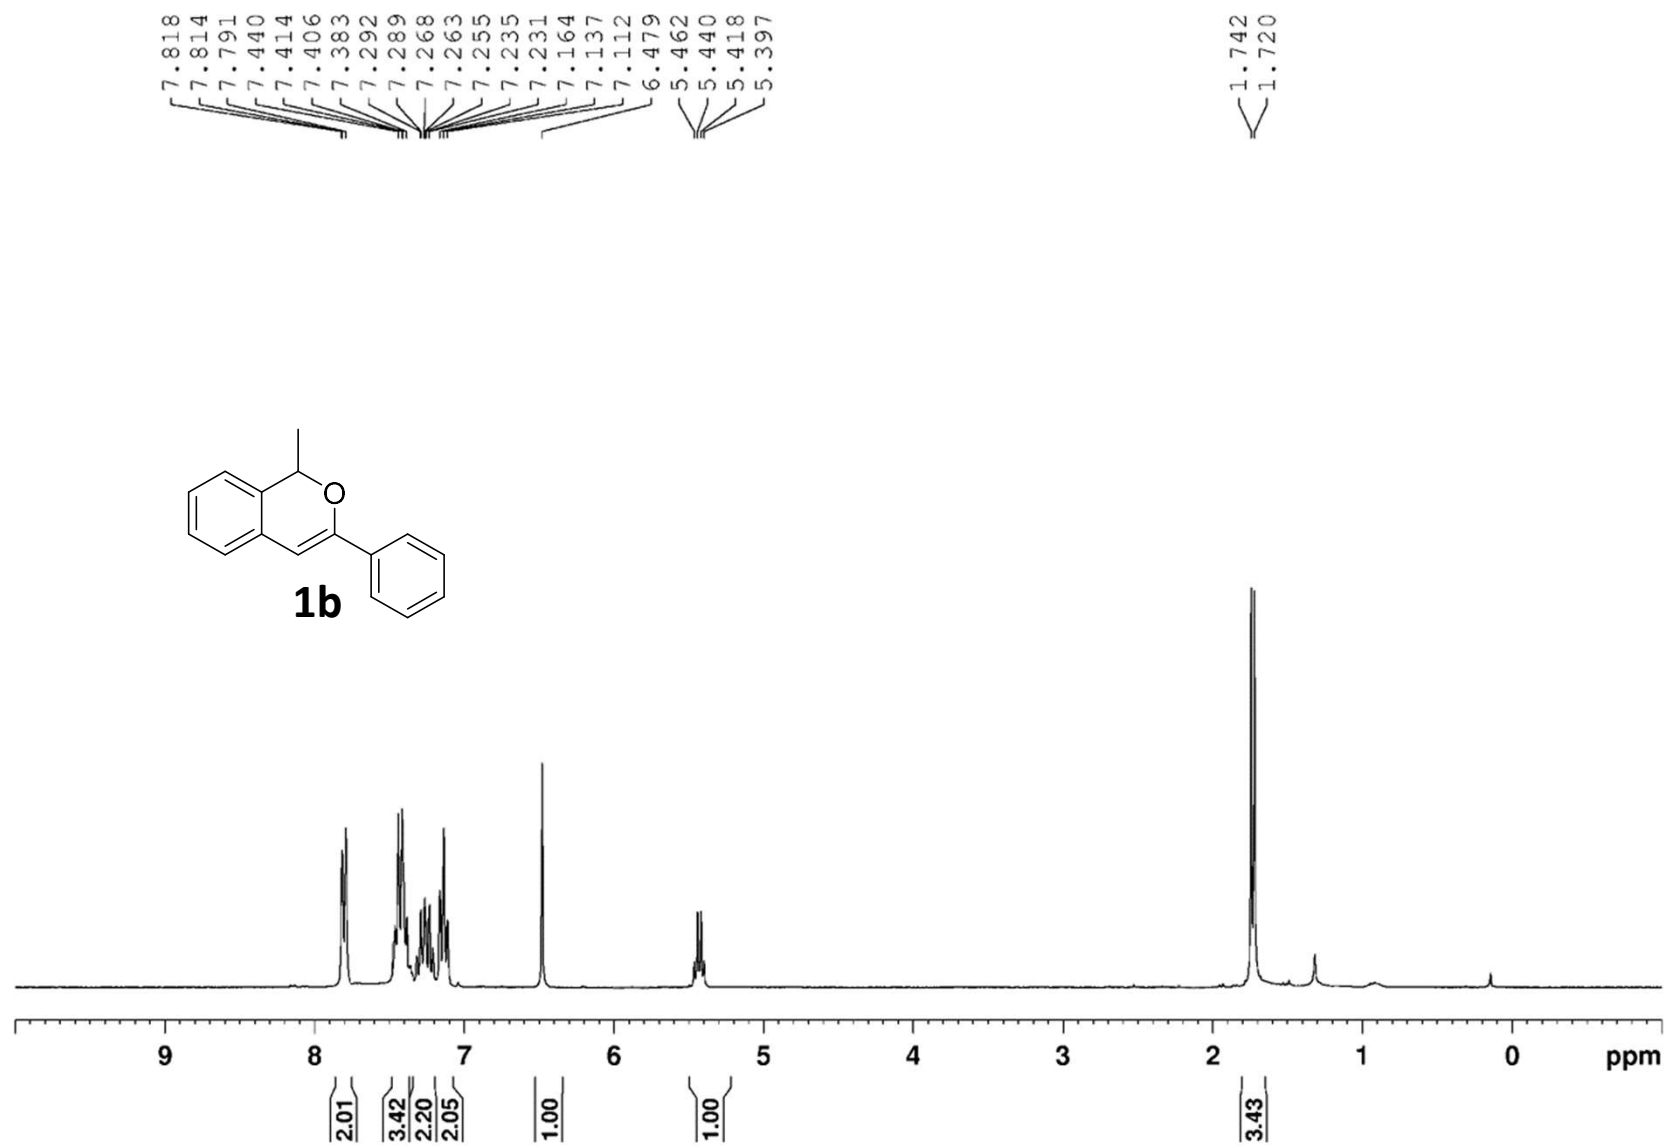

<sup>1</sup>H NMR of compound **1b** (300 MHz, CDCl<sub>3</sub>)



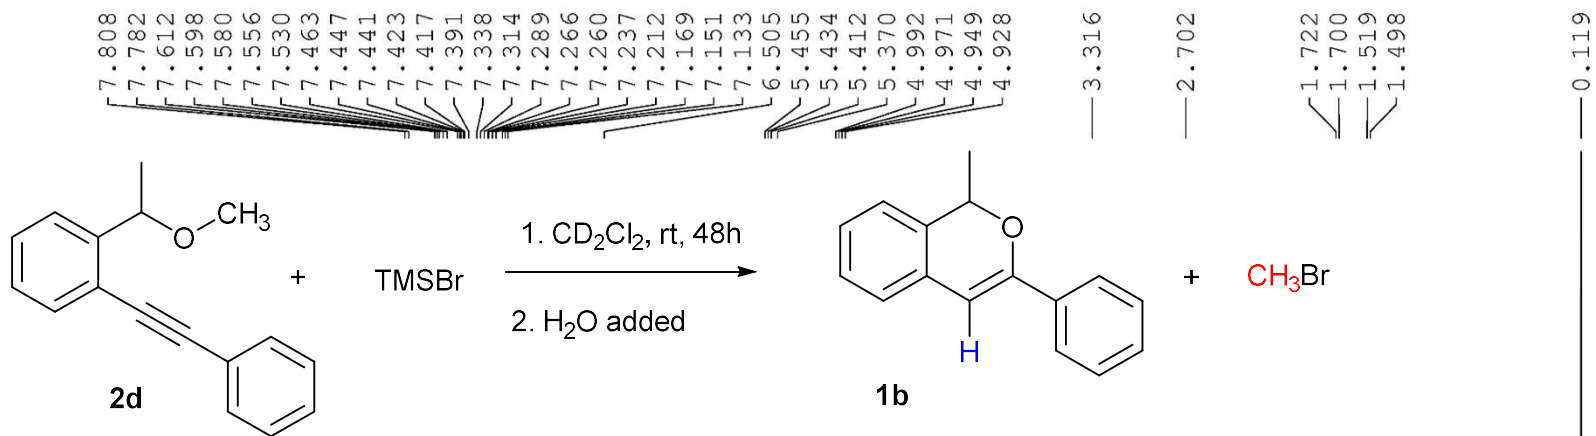

After 62% conversion of **2d**,  
**1b** : **CH<sub>3</sub>Br** = 1 : 0.72.

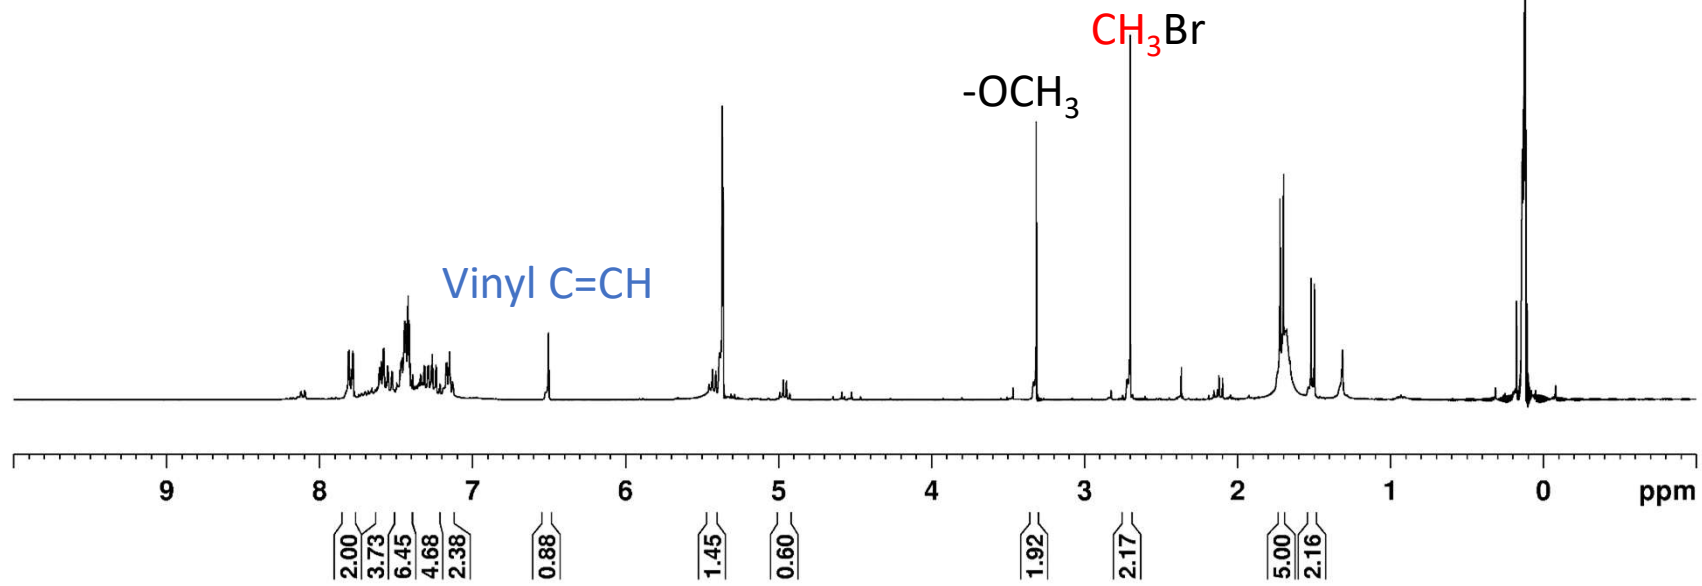

<sup>1</sup>H NMR for the reaction of **2d** to **1b** (300 MHz, CD<sub>2</sub>Cl<sub>2</sub>)

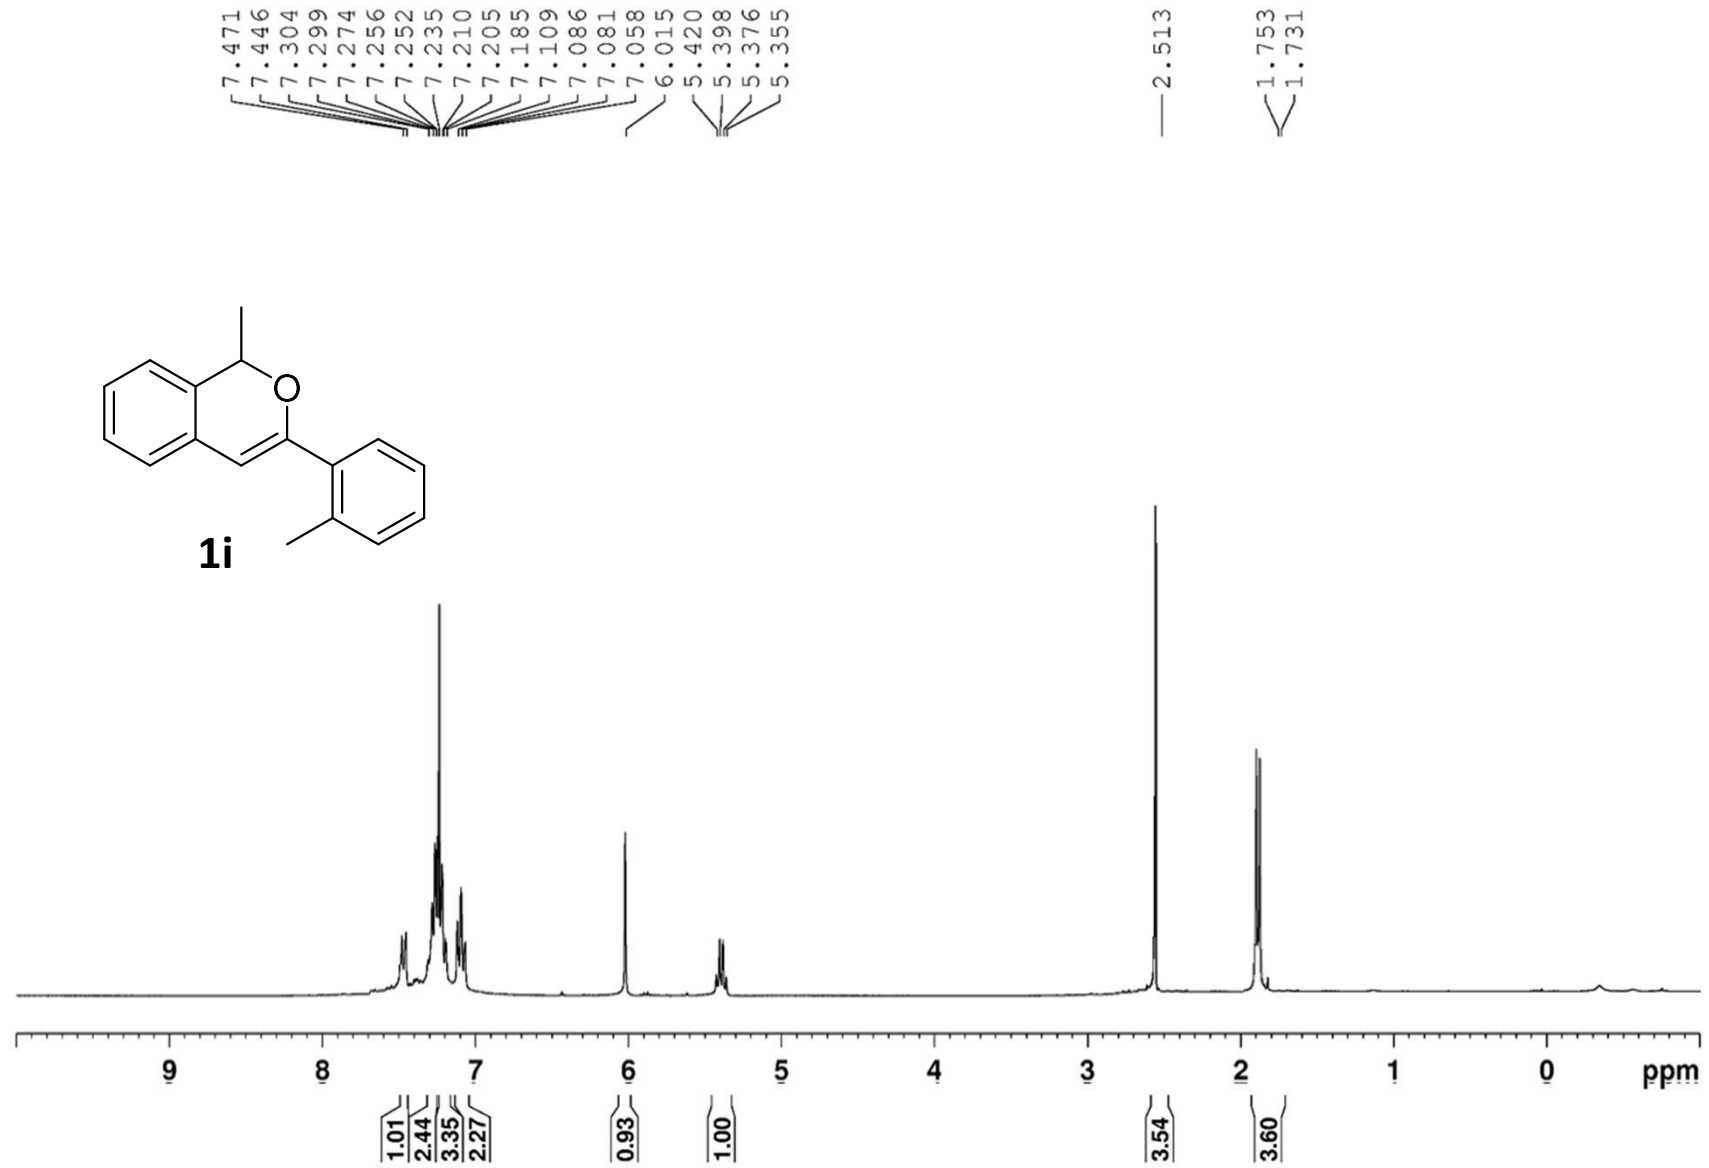

<sup>1</sup>H NMR of compound **1i** (300 MHz, CDCl<sub>3</sub>)

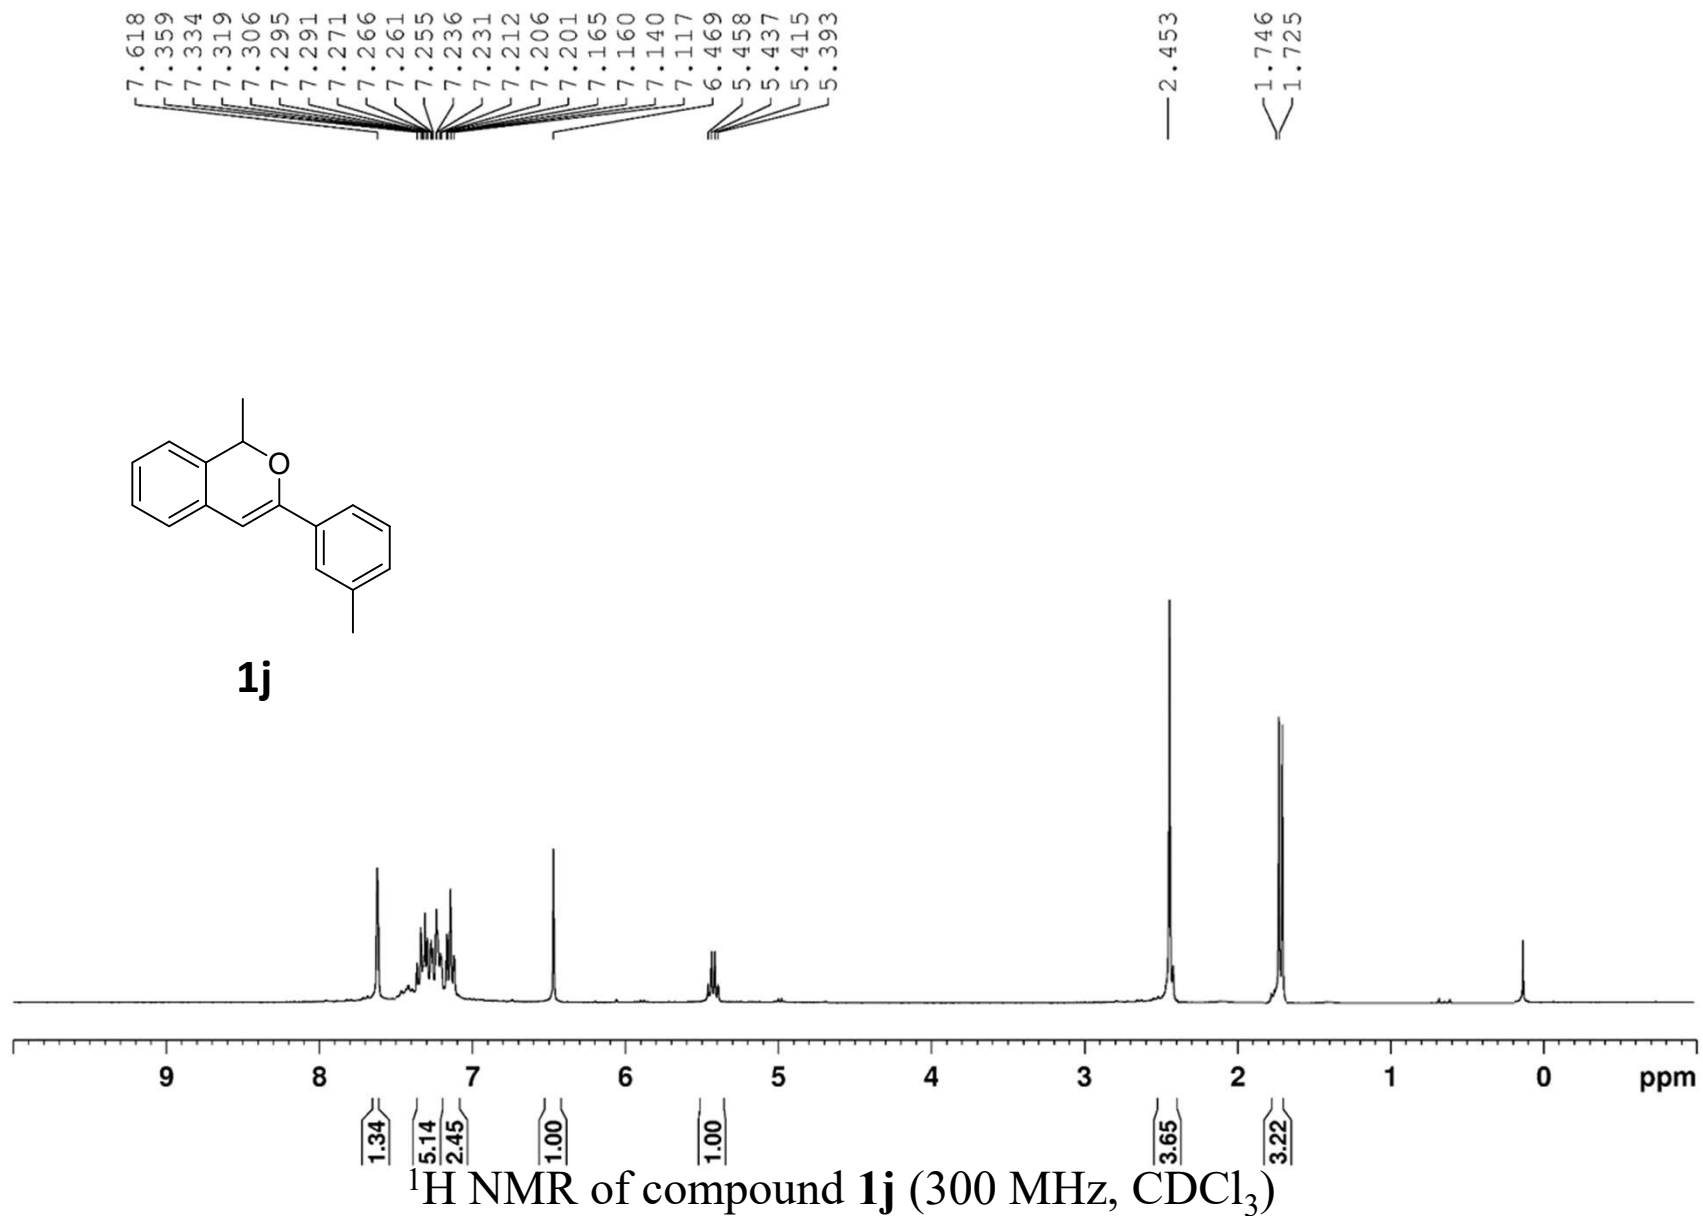

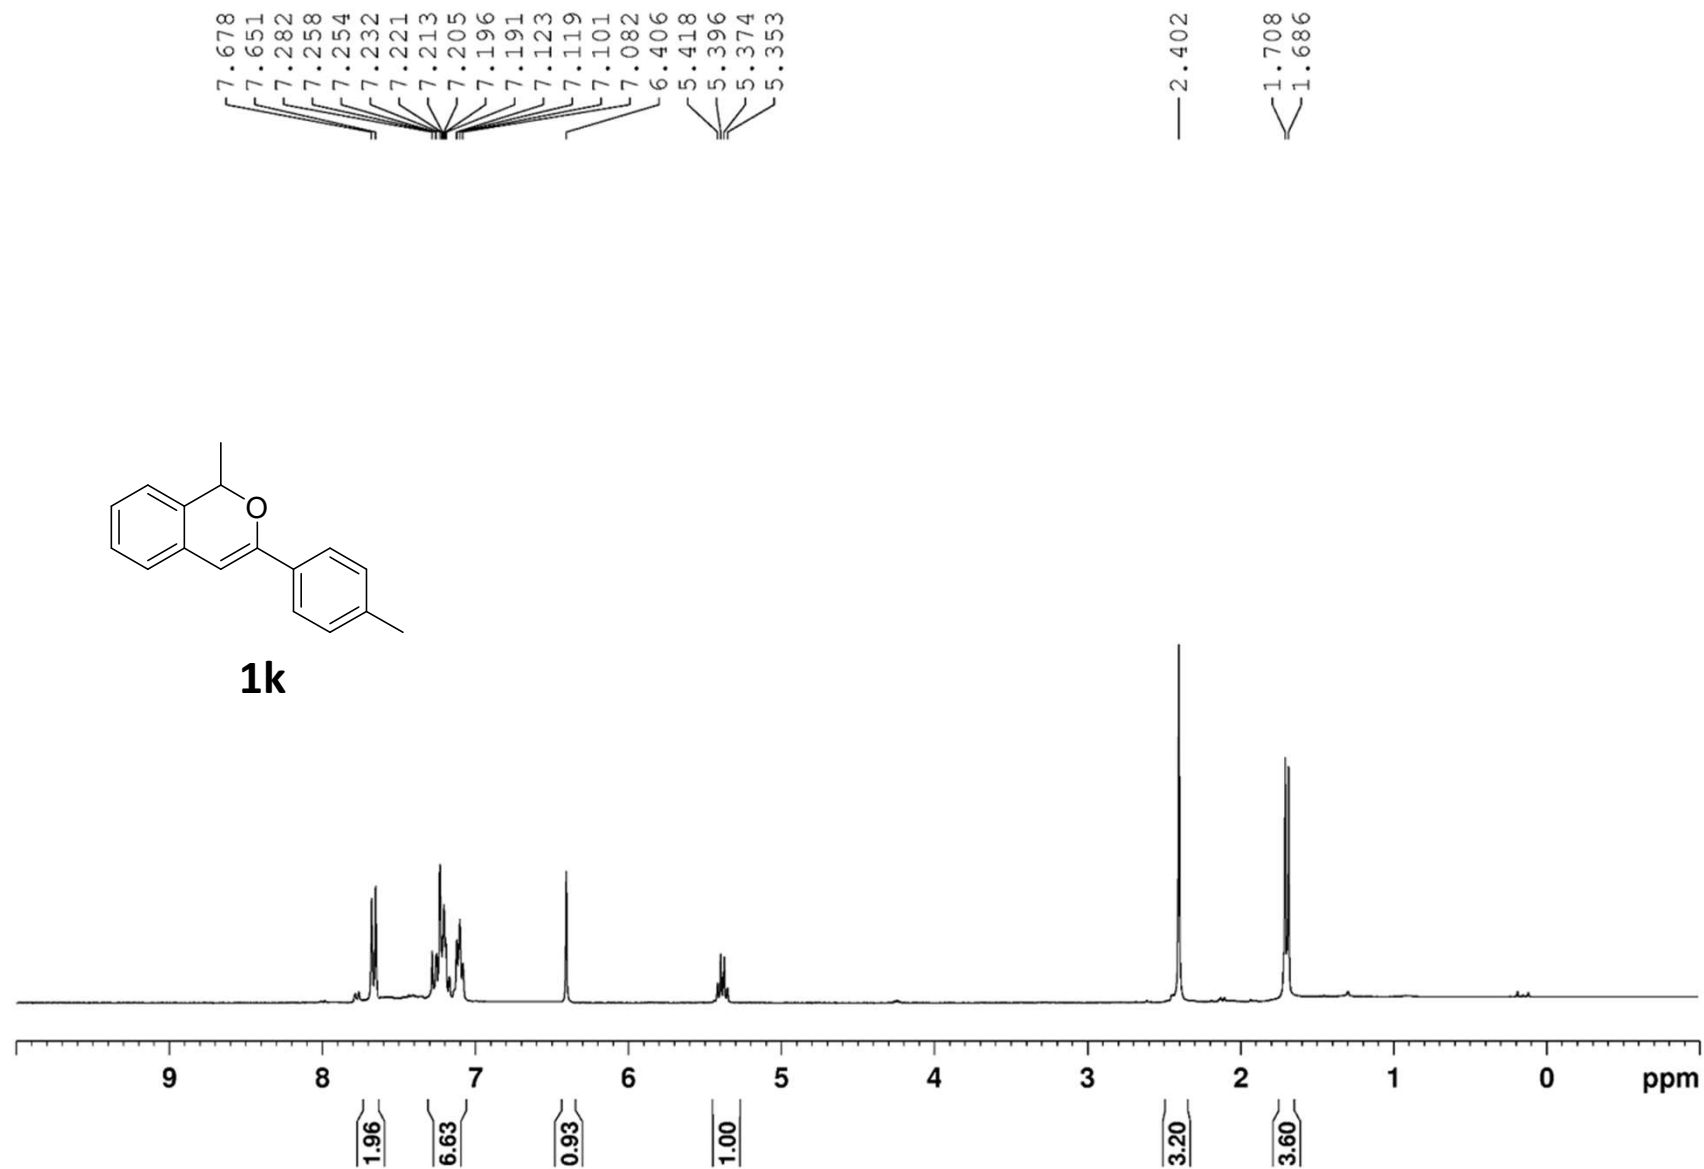

<sup>1</sup>H NMR of compound **1k** (500 MHz, CDCl<sub>3</sub>)

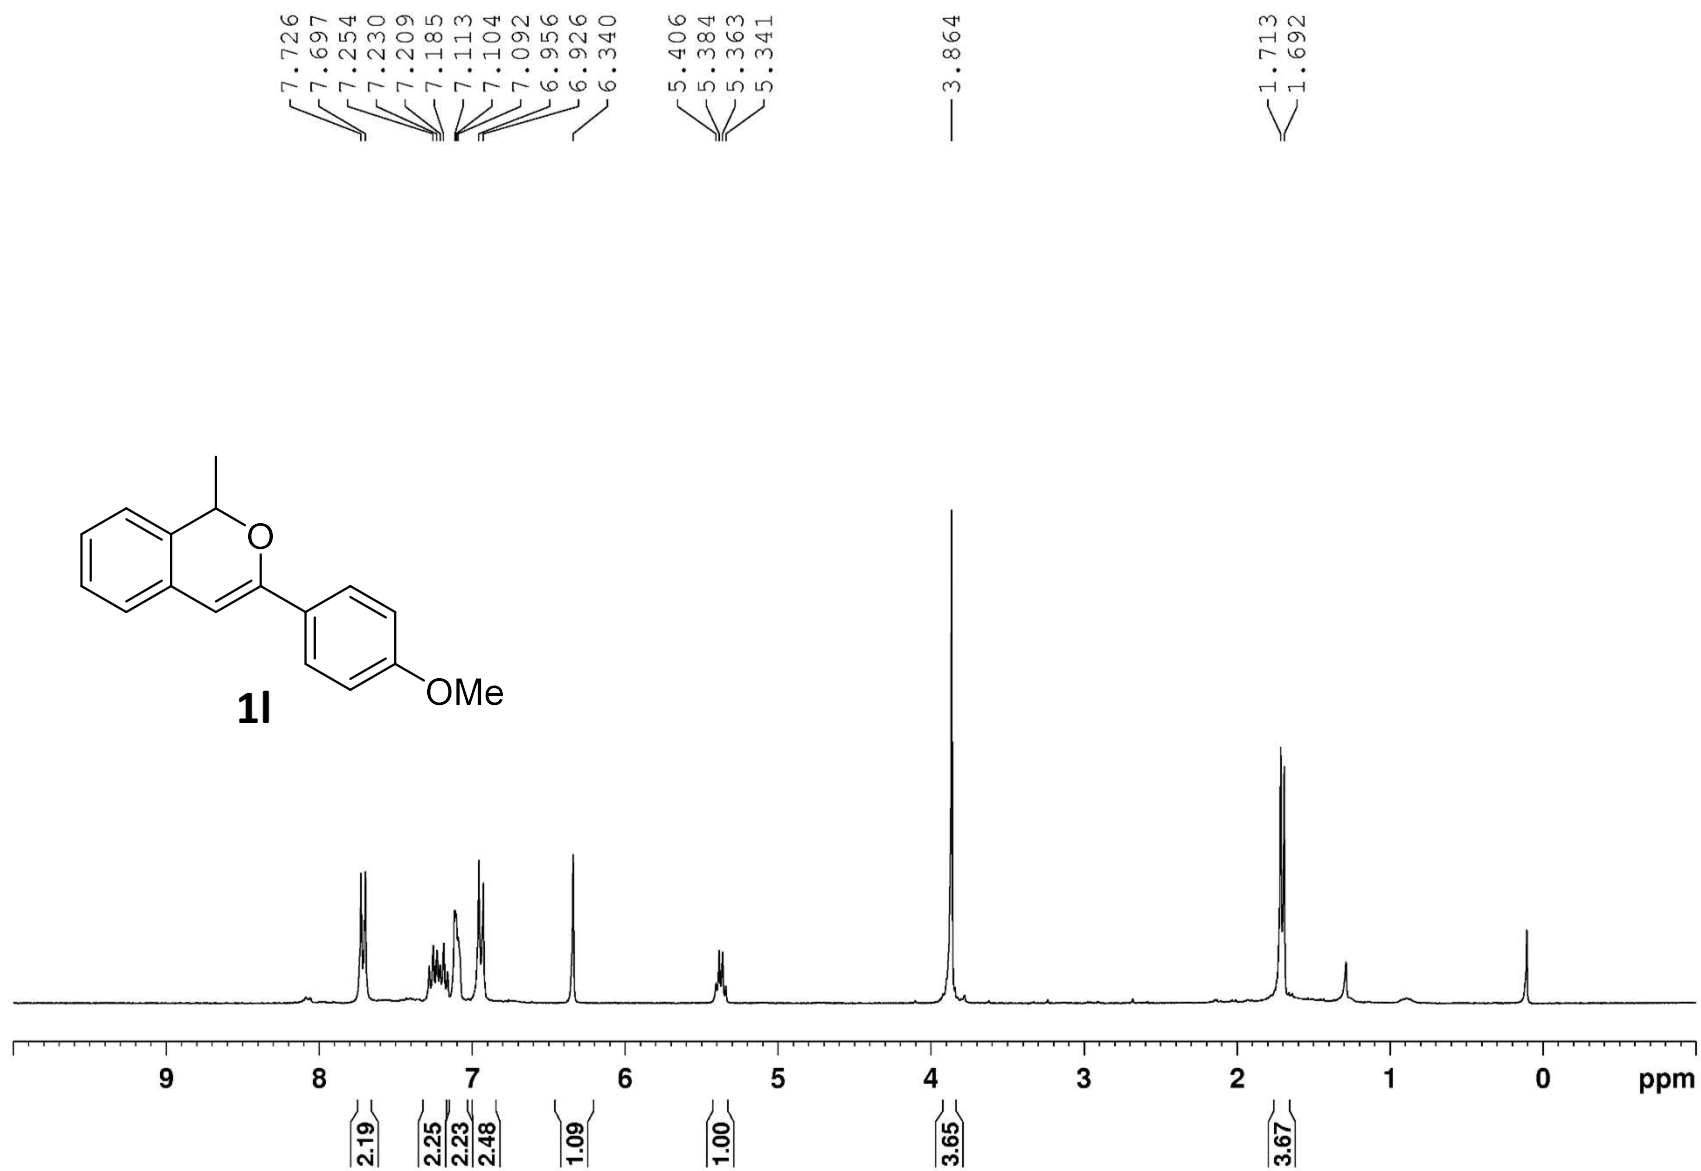

$^1\text{H}$  NMR of compound **11** (300 MHz,  $\text{CDCl}_3$ )

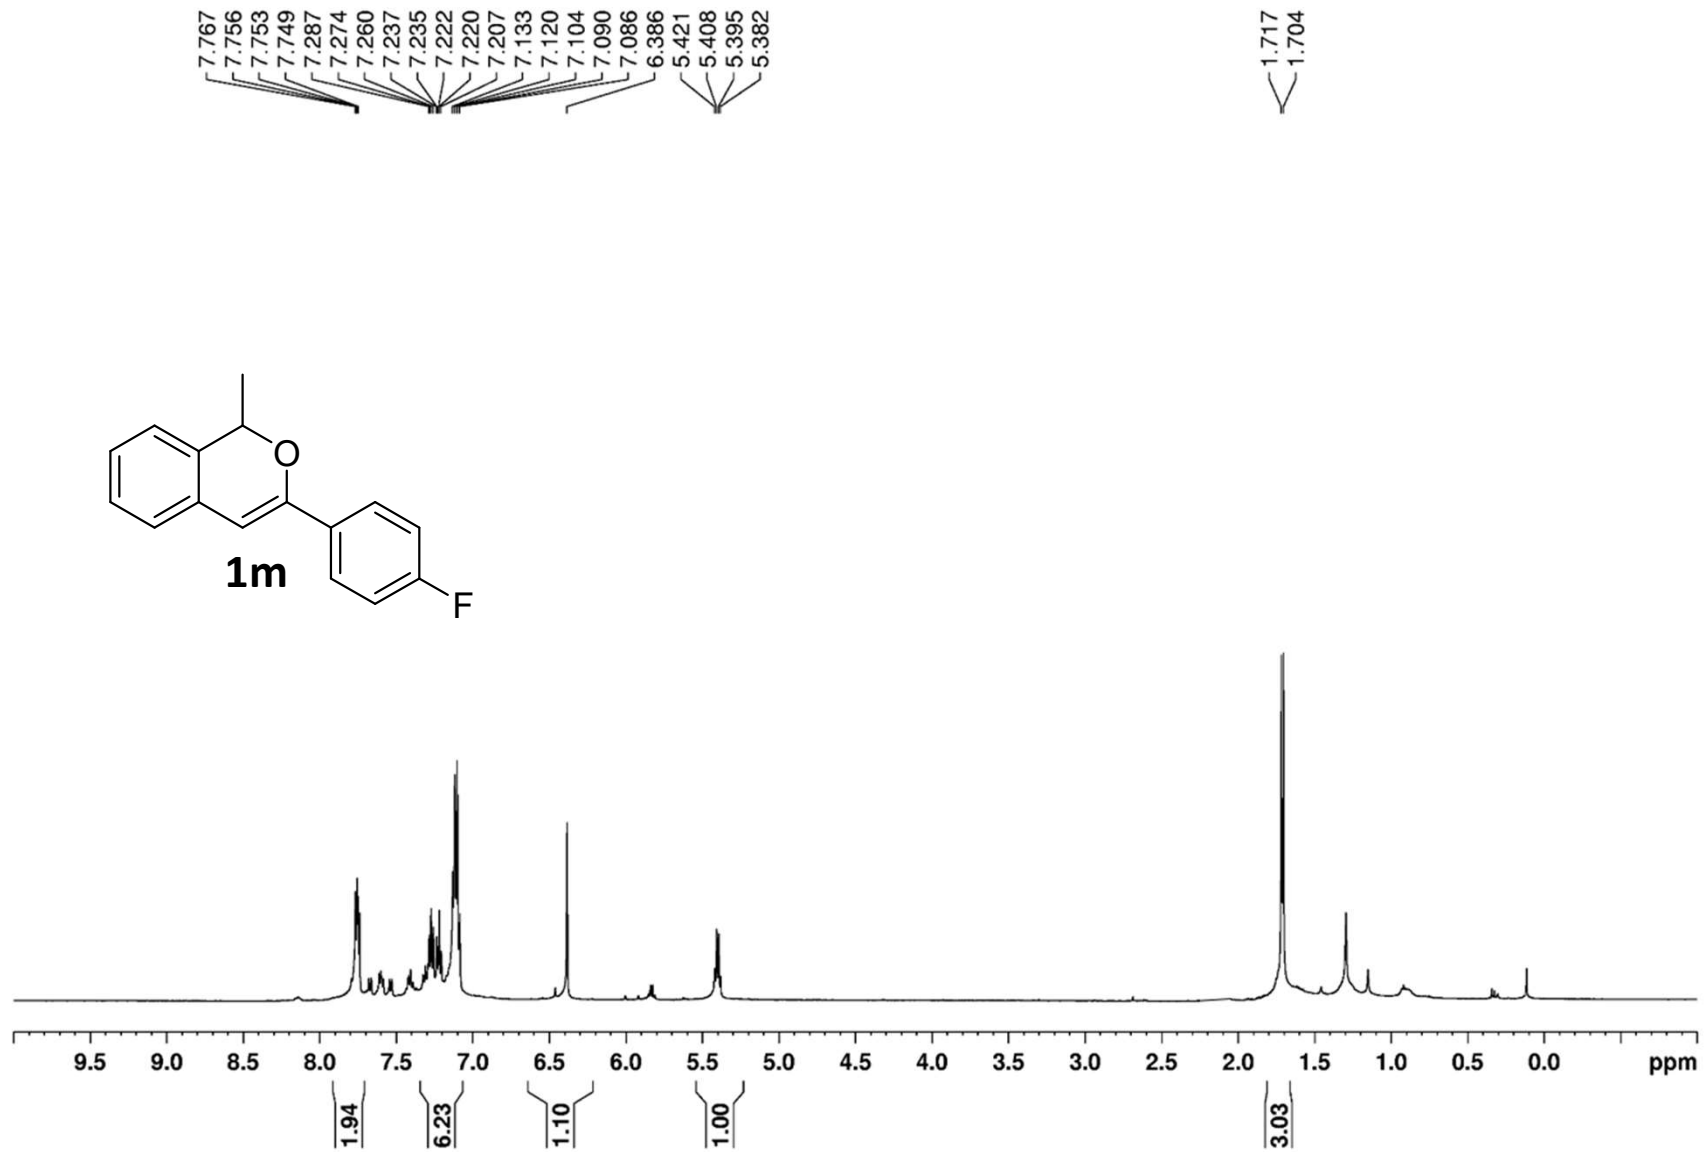

<sup>1</sup>H NMR of compound **1m** (300 MHz, CDCl<sub>3</sub>)

7.7510  
7.7454  
7.7232  
7.7192  
7.4716  
7.4641  
7.4430  
7.4226  
7.4179  
7.4100  
7.3974  
7.3873  
7.3814  
7.3718  
7.3641  
7.3616  
7.3520  
7.3307  
7.3265  
7.3200  
7.3064  
7.3041  
7.2936  
7.2909  
7.2795  
7.2701  
7.2638  
7.2444  
7.2398  
7.1280  
7.1229  
7.1035  
7.0999  
7.0350  
7.0334  
7.0106  
6.3868  
5.9230  
3.4881  
3.4658  
3.4428  
3.4194  
2.8908  
2.6332  
2.6067  
2.3718  
2.3451  
2.3201

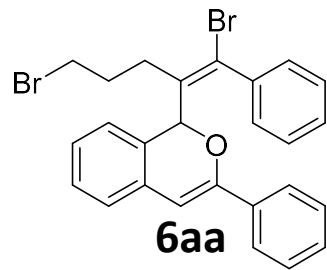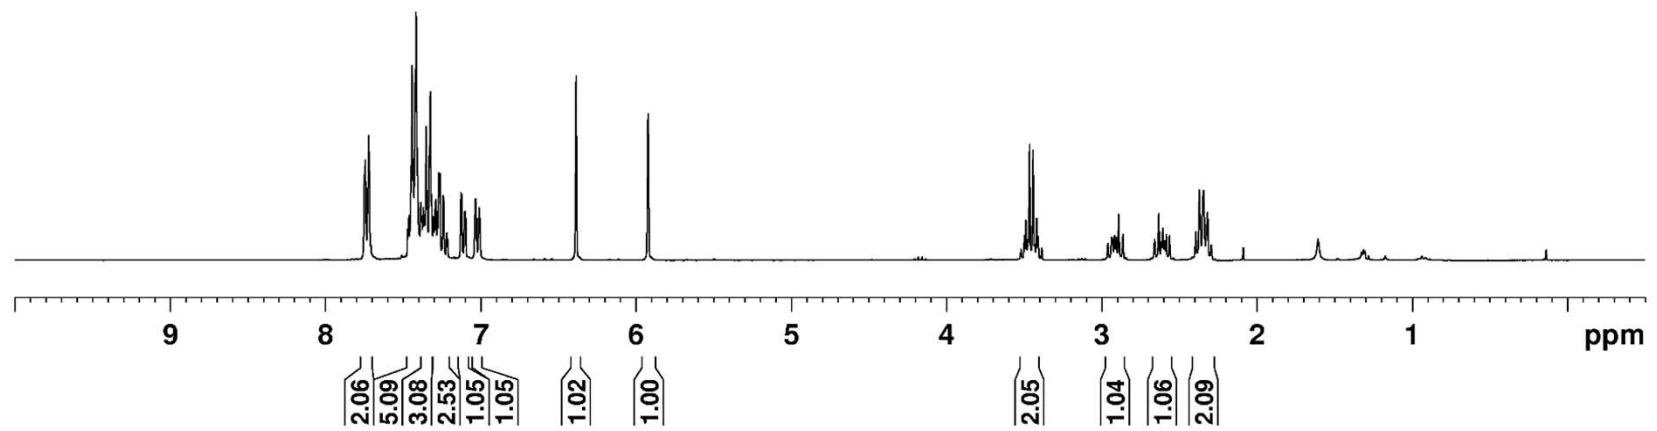

<sup>1</sup>H NMR of compound **6aa** (300 MHz, CDCl<sub>3</sub>)

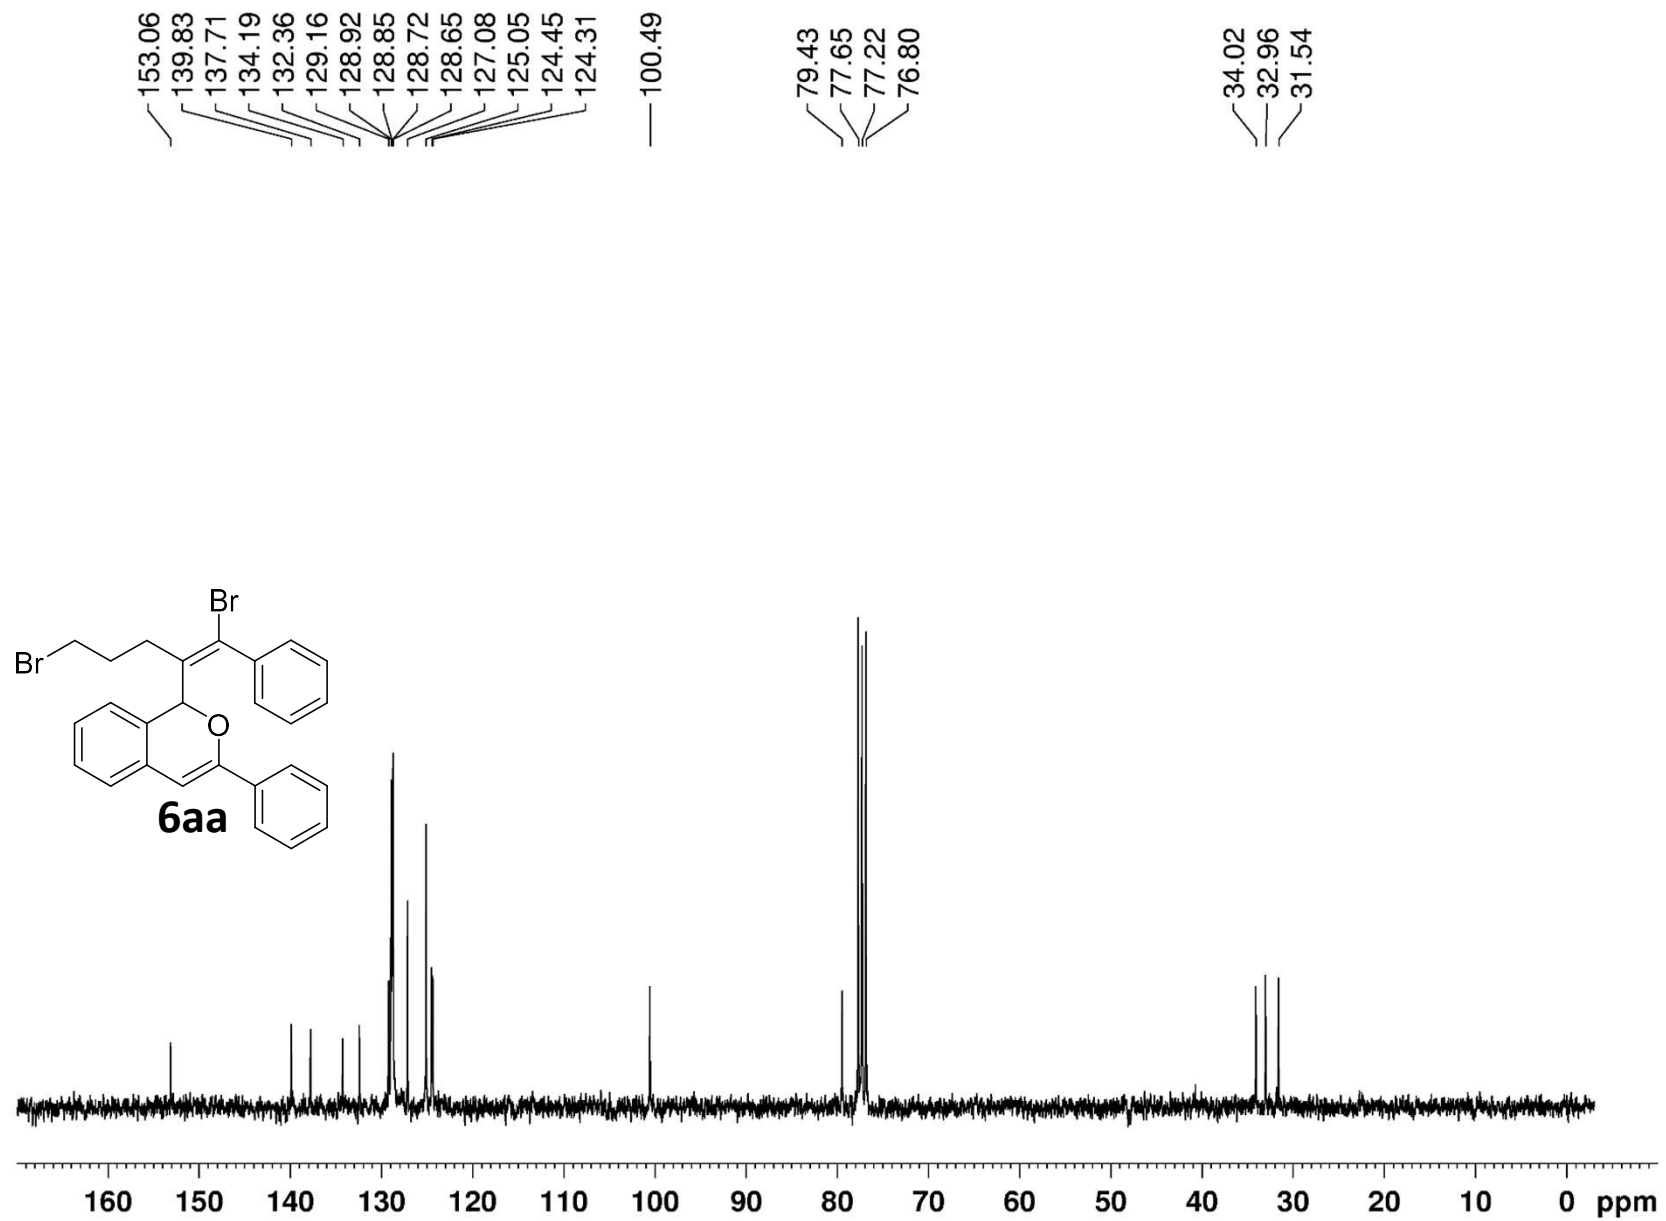

$^{13}\text{C}\{^1\text{H}\}$  NMR of compound **6aa** (75 MHz,  $\text{CDCl}_3$ )



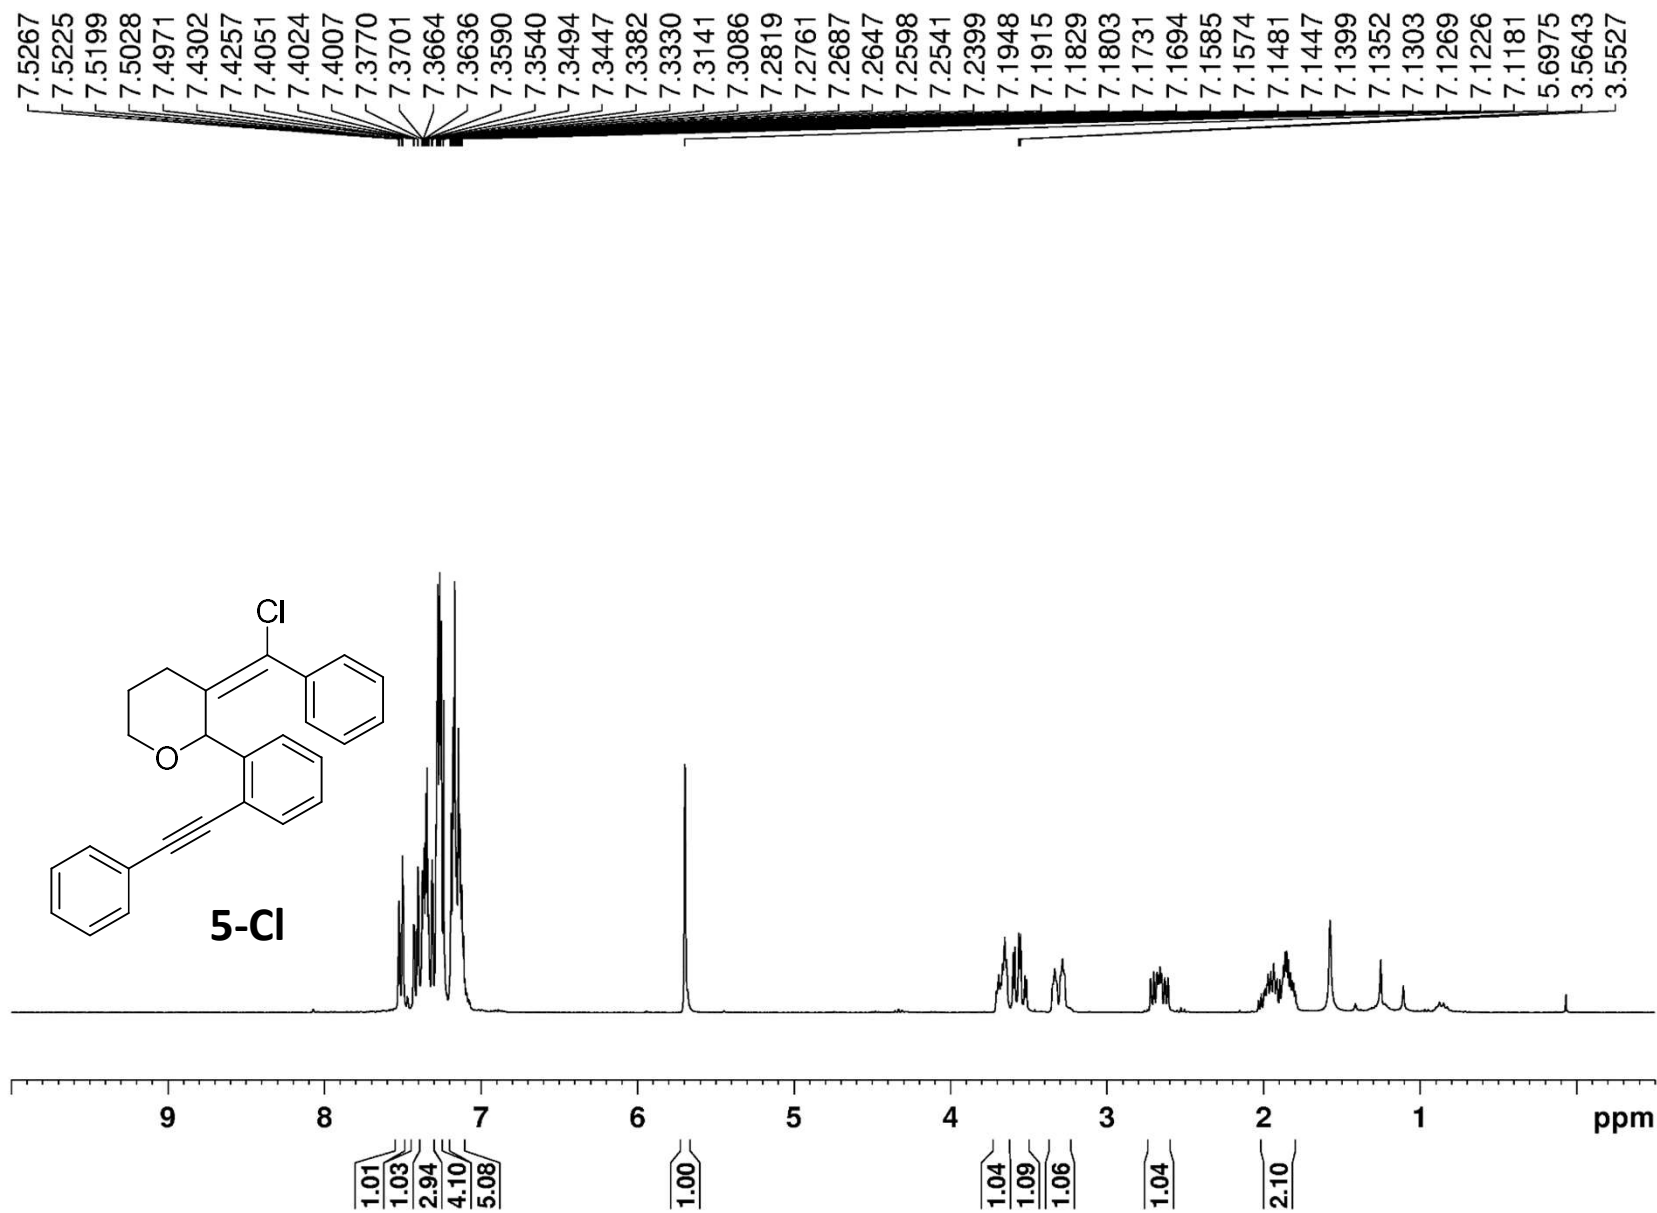

<sup>1</sup>H NMR of compound **5-Cl** (300 MHz, CDCl<sub>3</sub>)

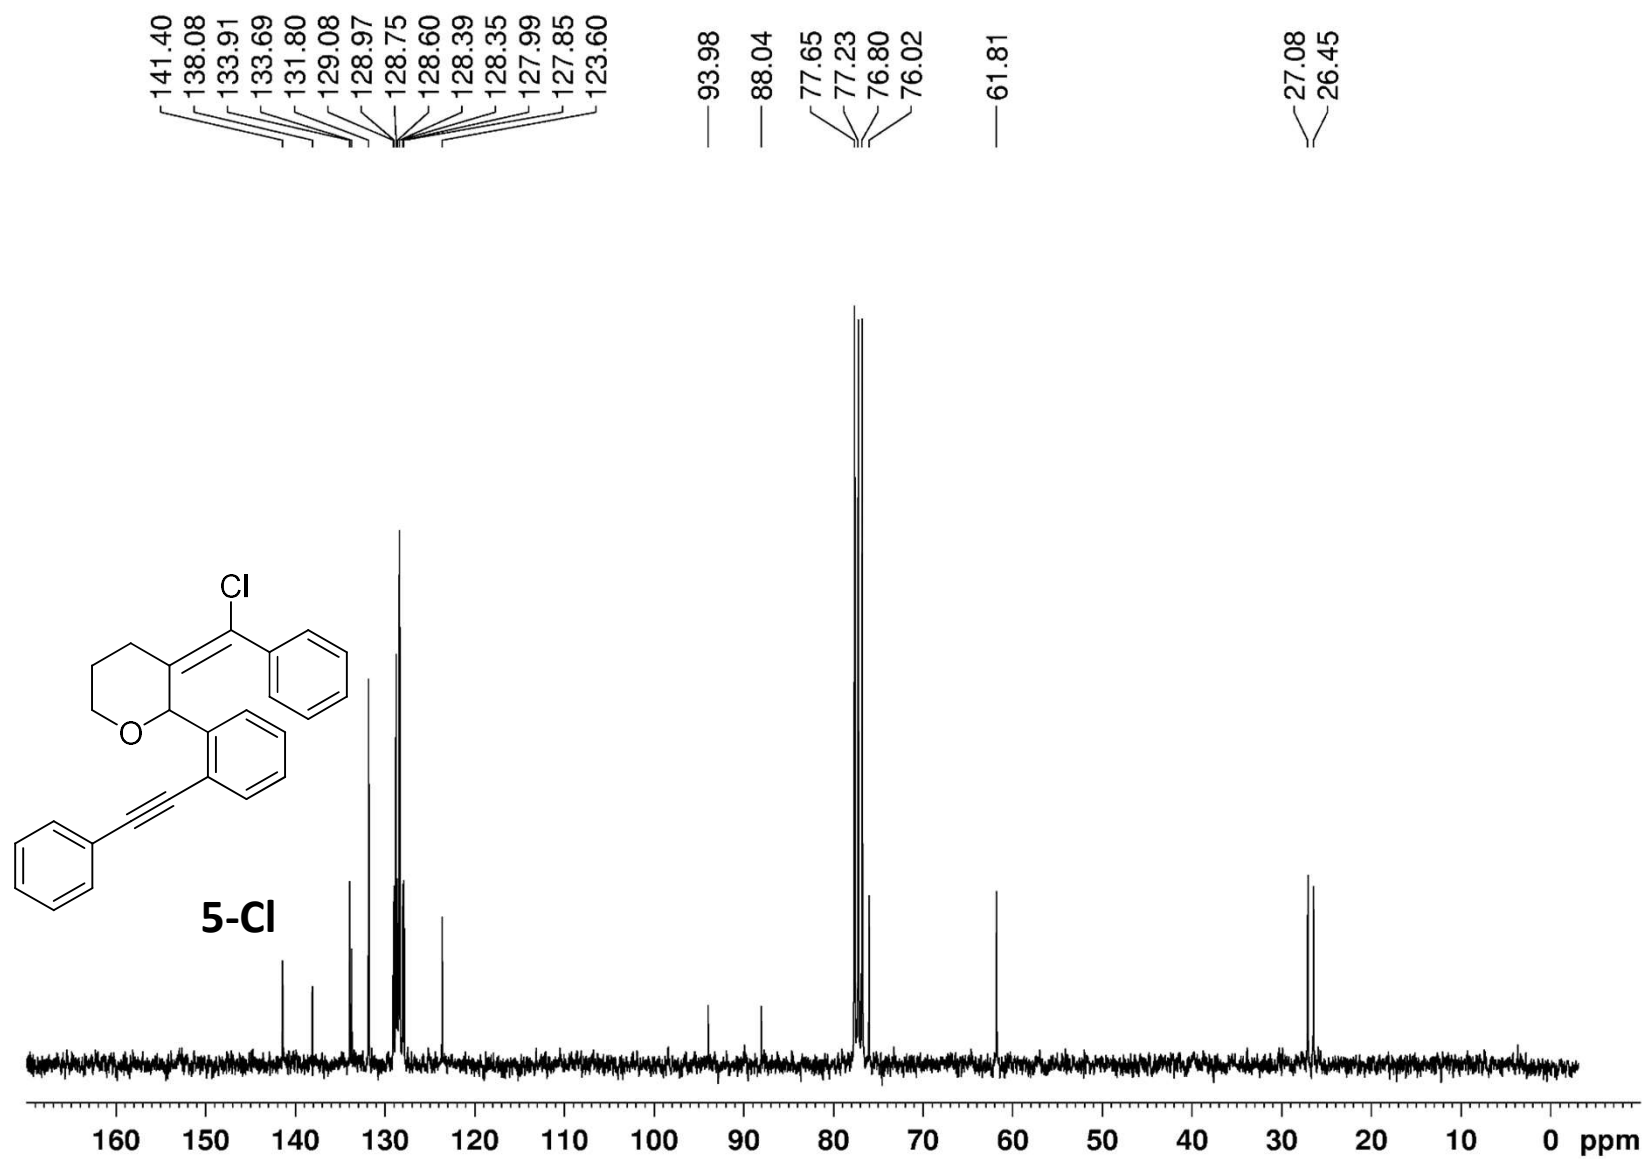

**5-Cl**

$^{13}\text{C}\{^1\text{H}\}$  NMR of compound **5-Cl** (75 MHz,  $\text{CDCl}_3$ )

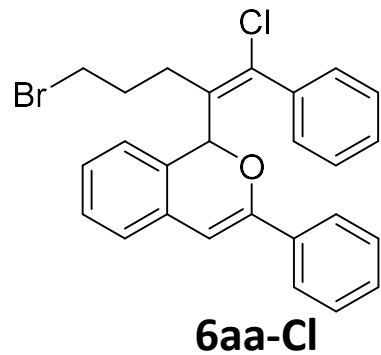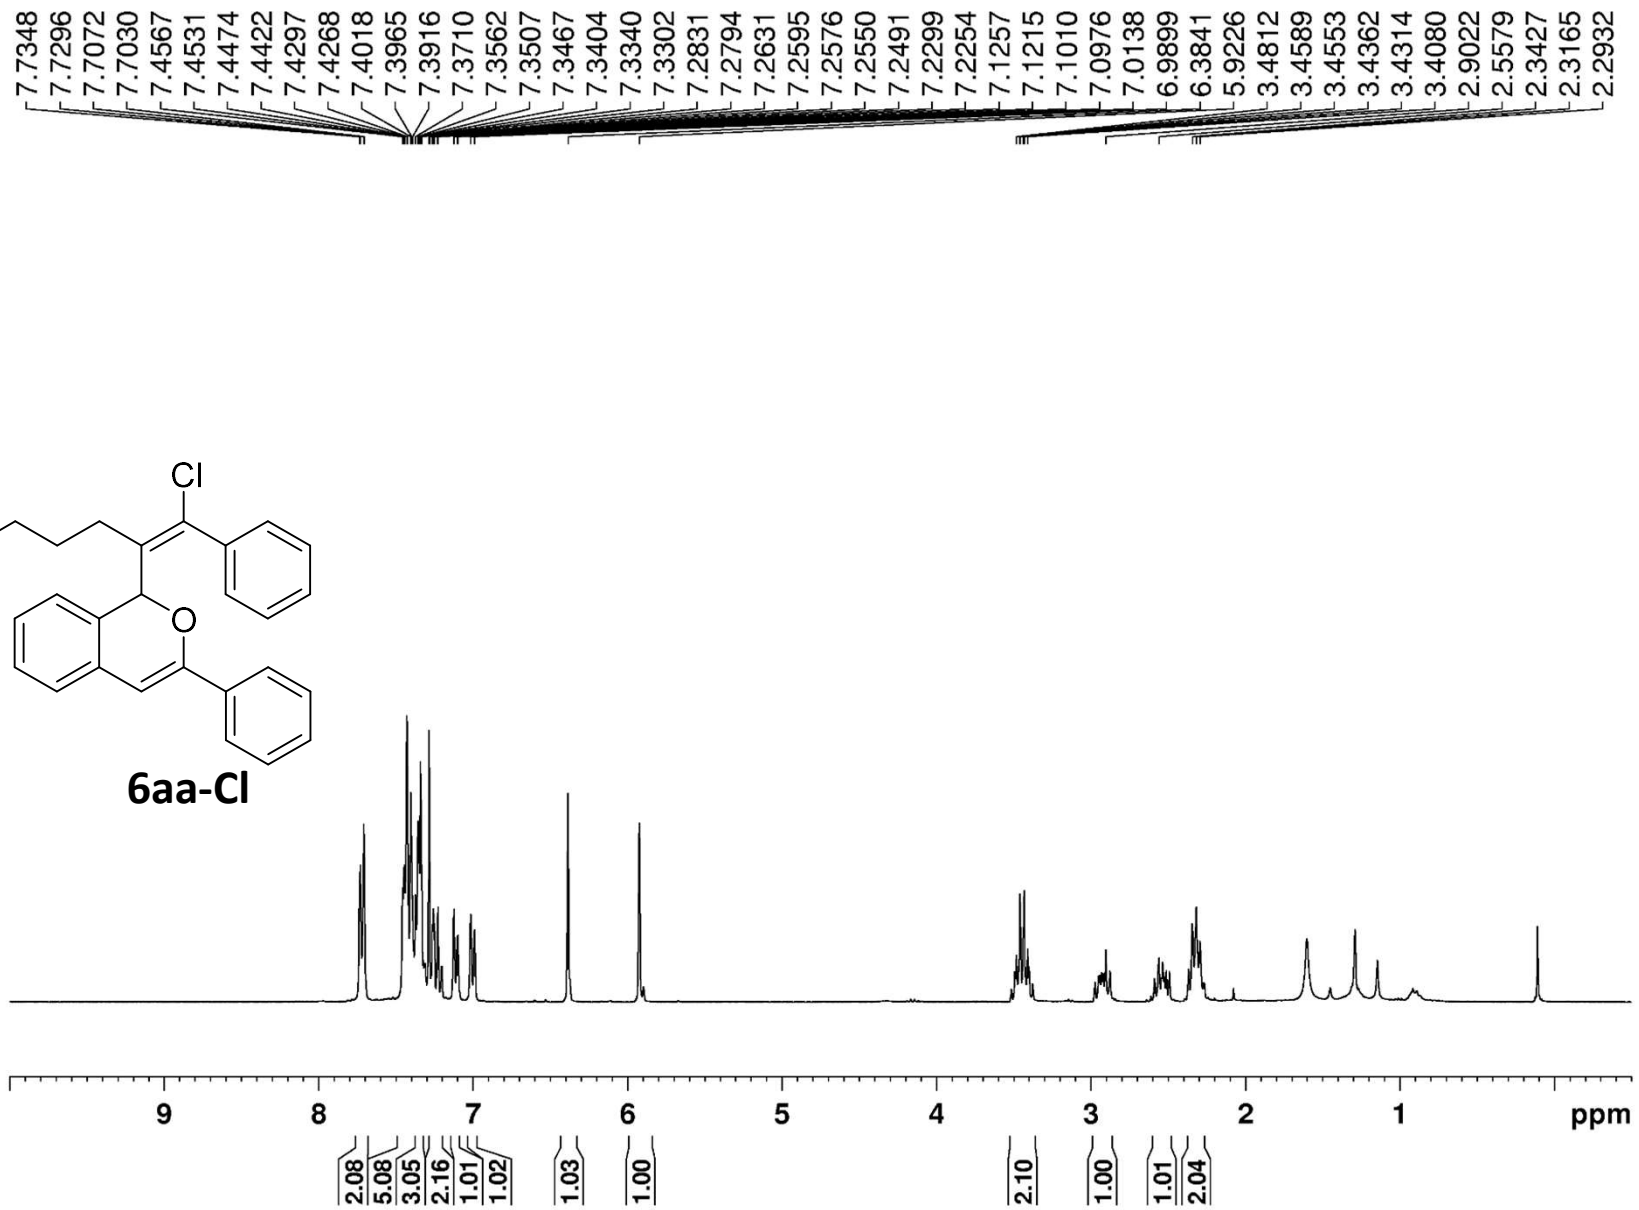

$^1\text{H}$  NMR of compound **6aa-Cl** (300 MHz,  $\text{CDCl}_3$ )

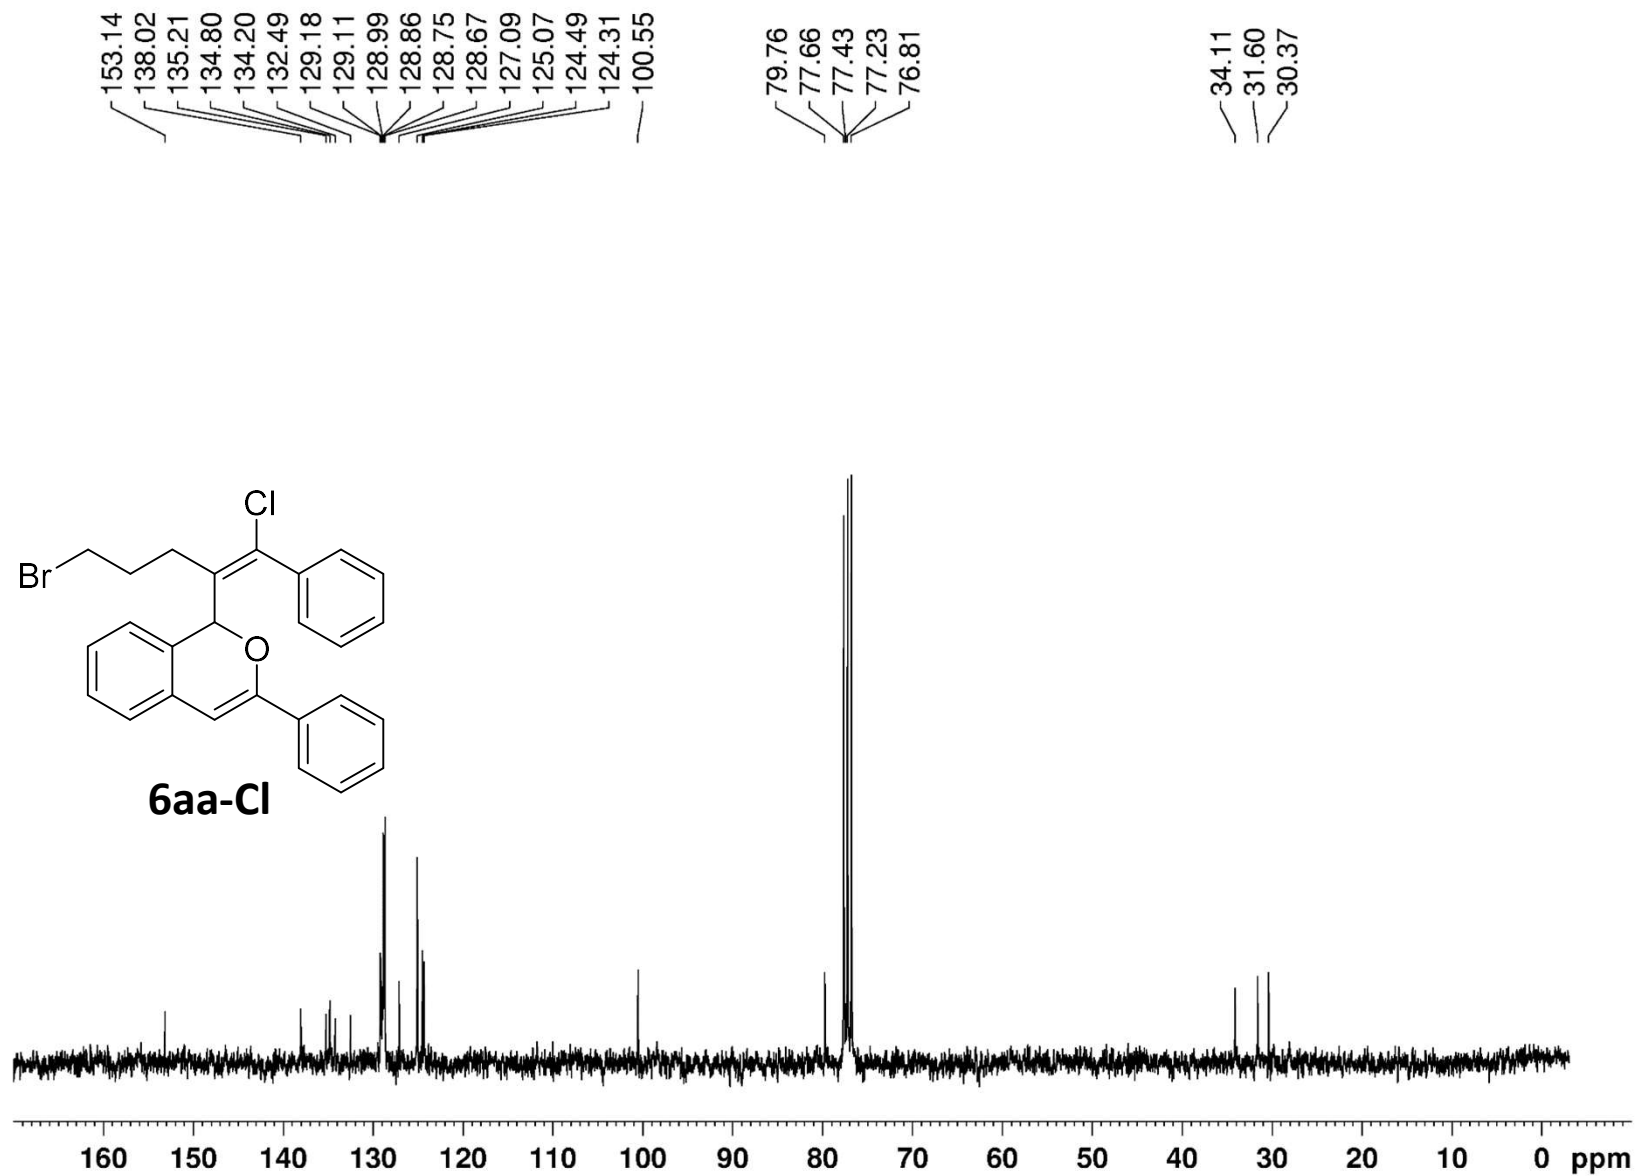

$^{13}\text{C}$  NMR of compound **6aa-Cl** (75 MHz,  $\text{CDCl}_3$ )

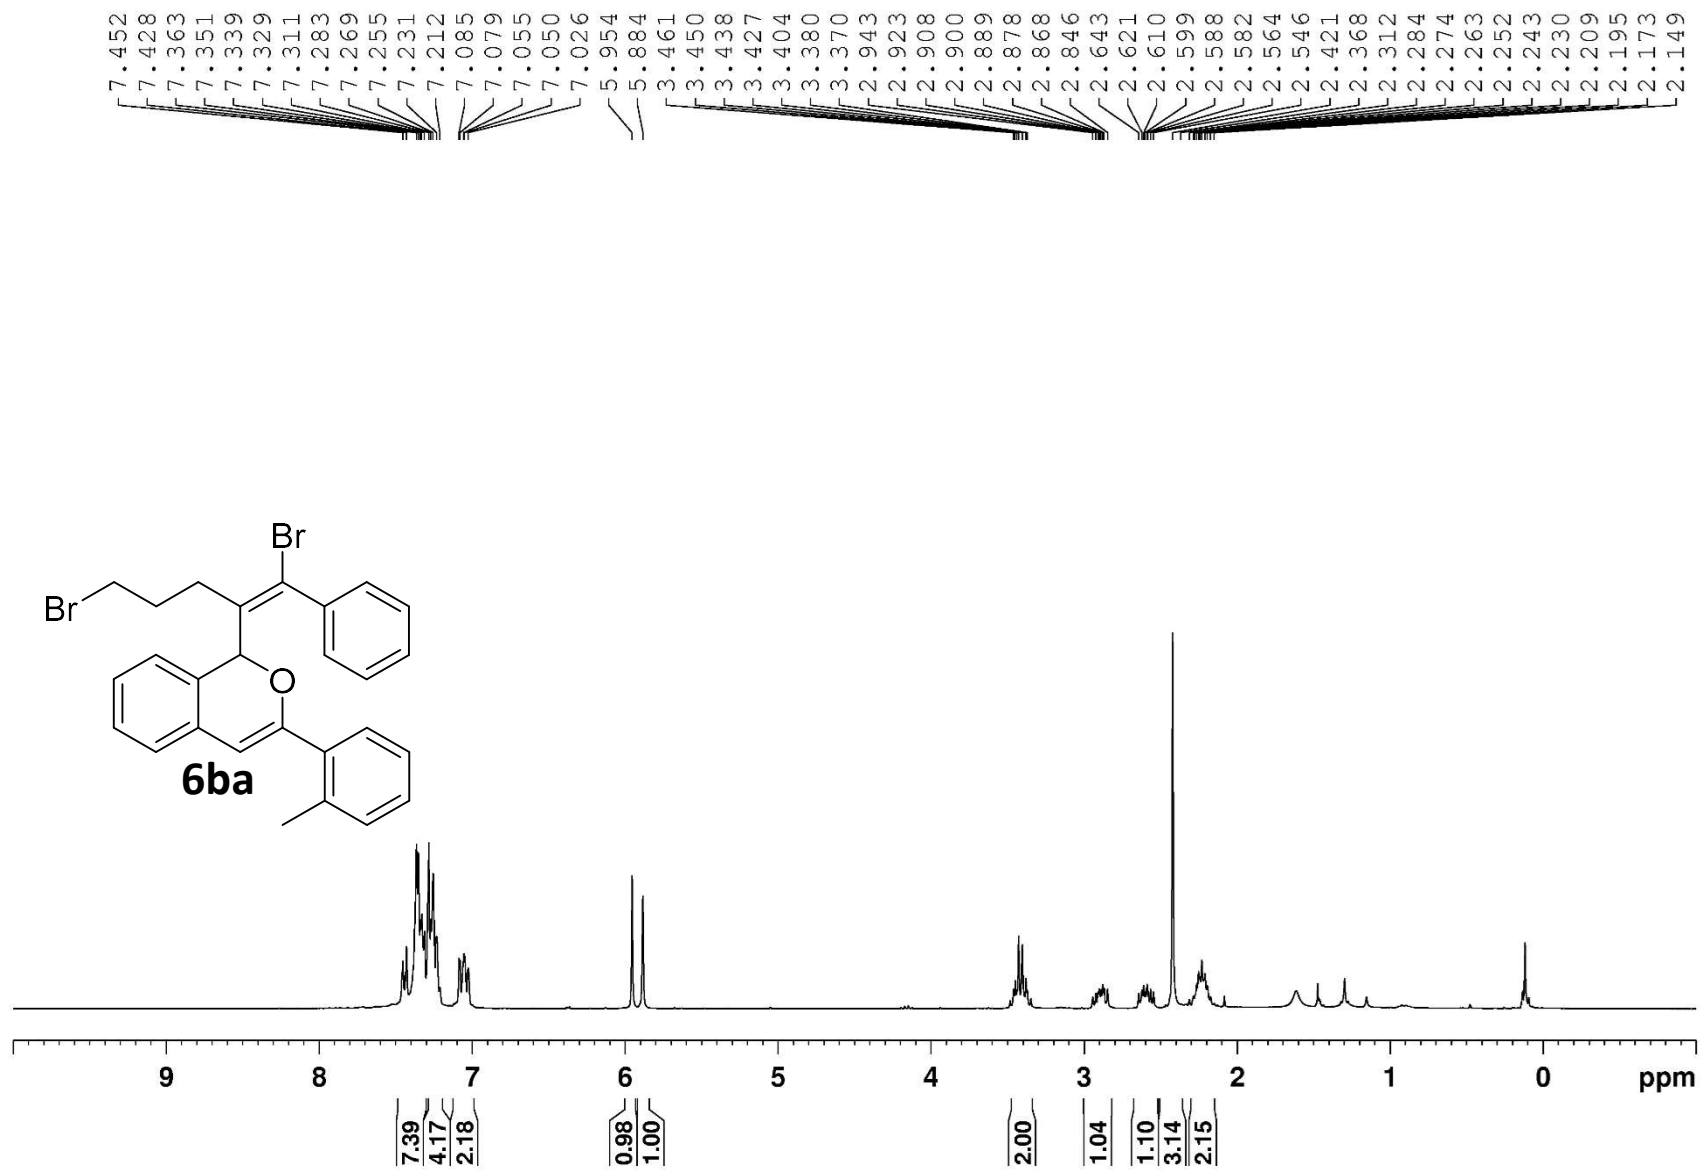

$^1\text{H}$  NMR of compound **6ba** (300 MHz,  $\text{CDCl}_3$ )

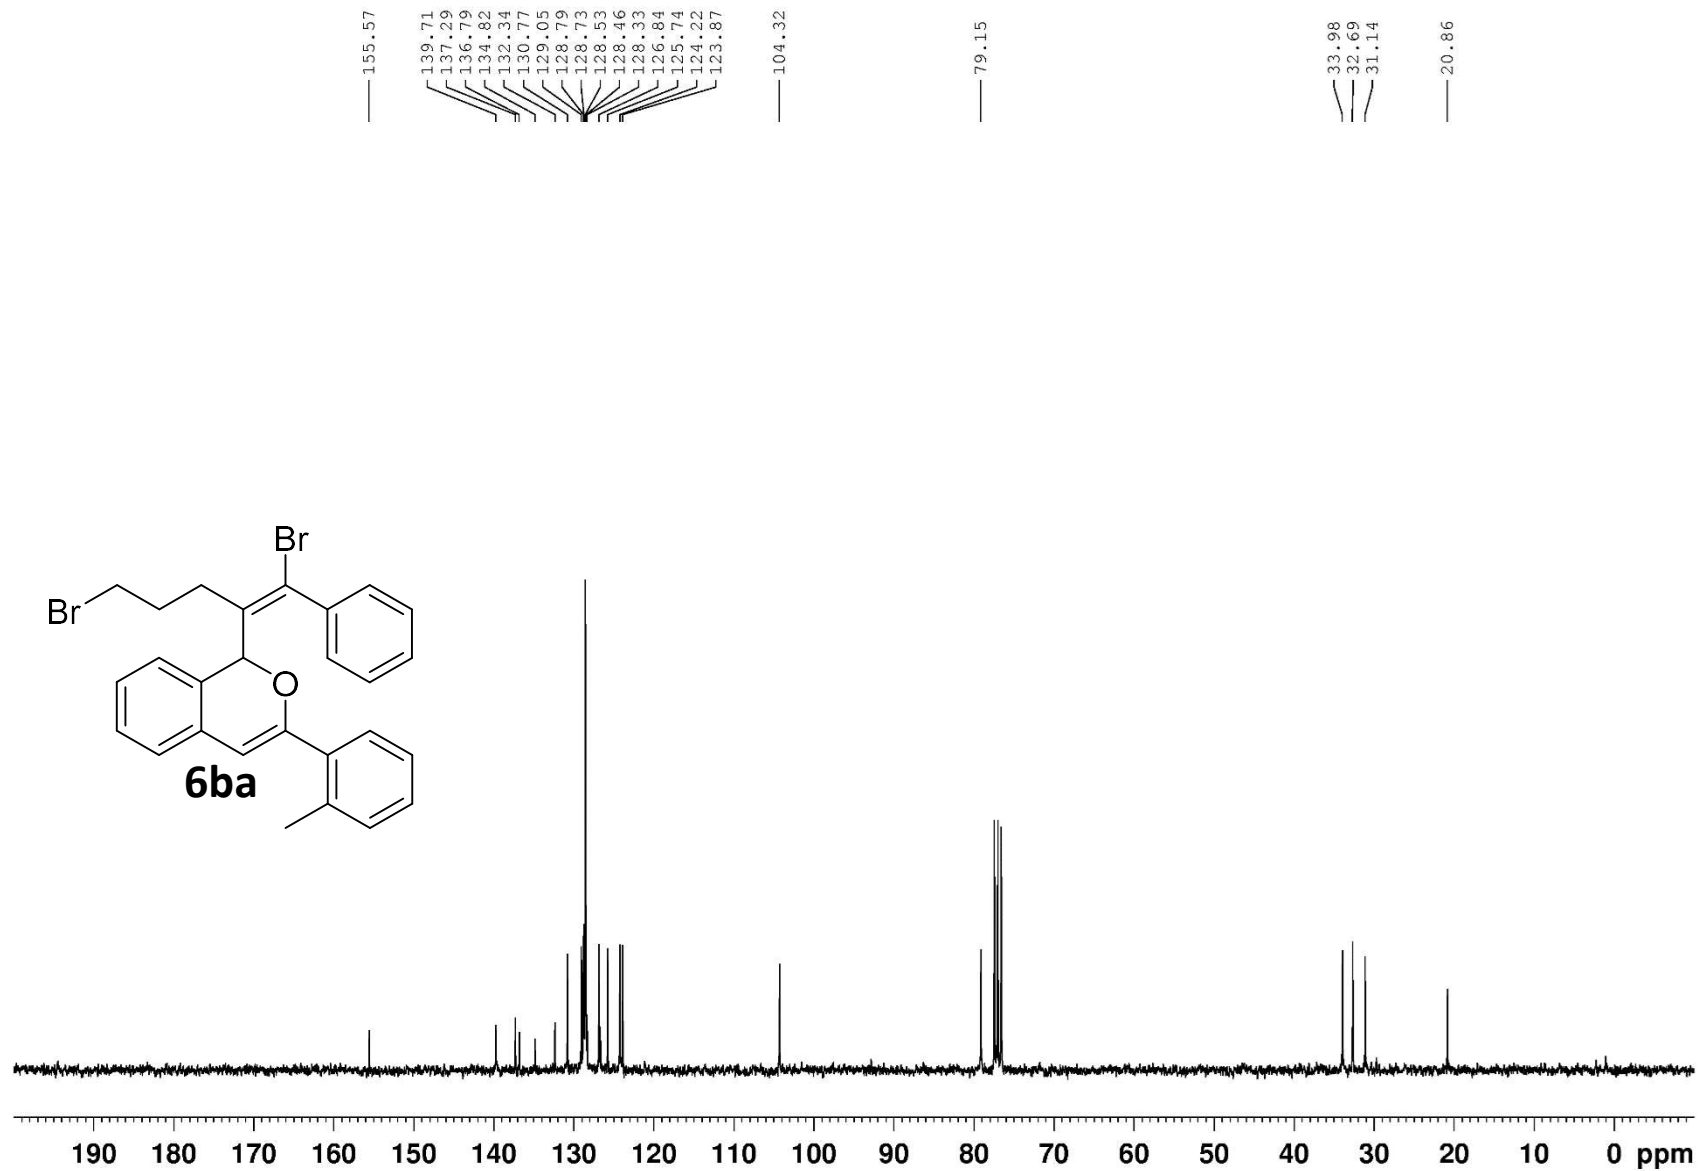

<sup>13</sup>C {<sup>1</sup>H} NMR of compound **6ba** (75 MHz, CDCl<sub>3</sub>)

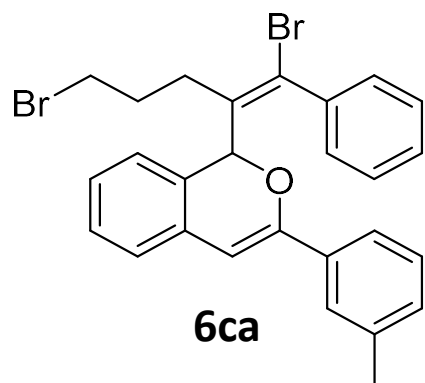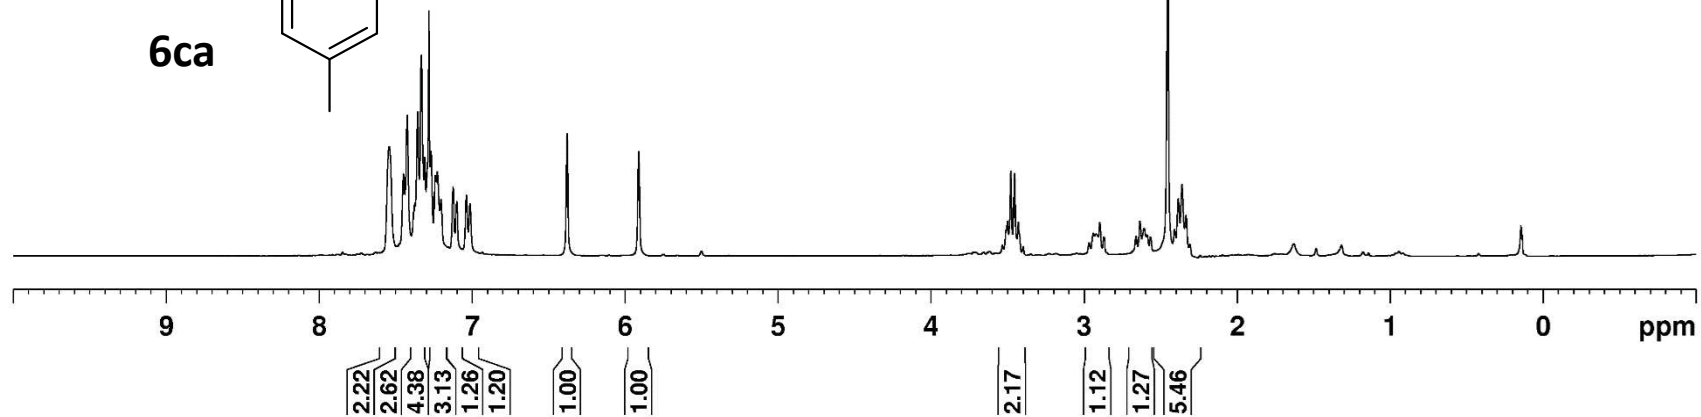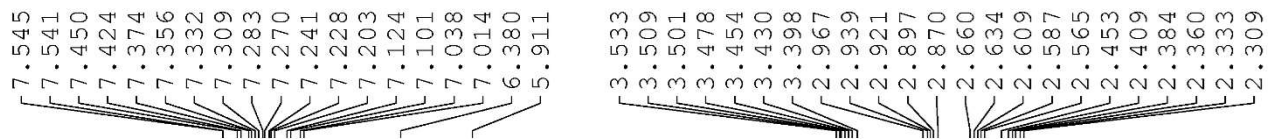

$^1\text{H}$  NMR of compound **6ca** (300 MHz,  $\text{CDCl}_3$ )

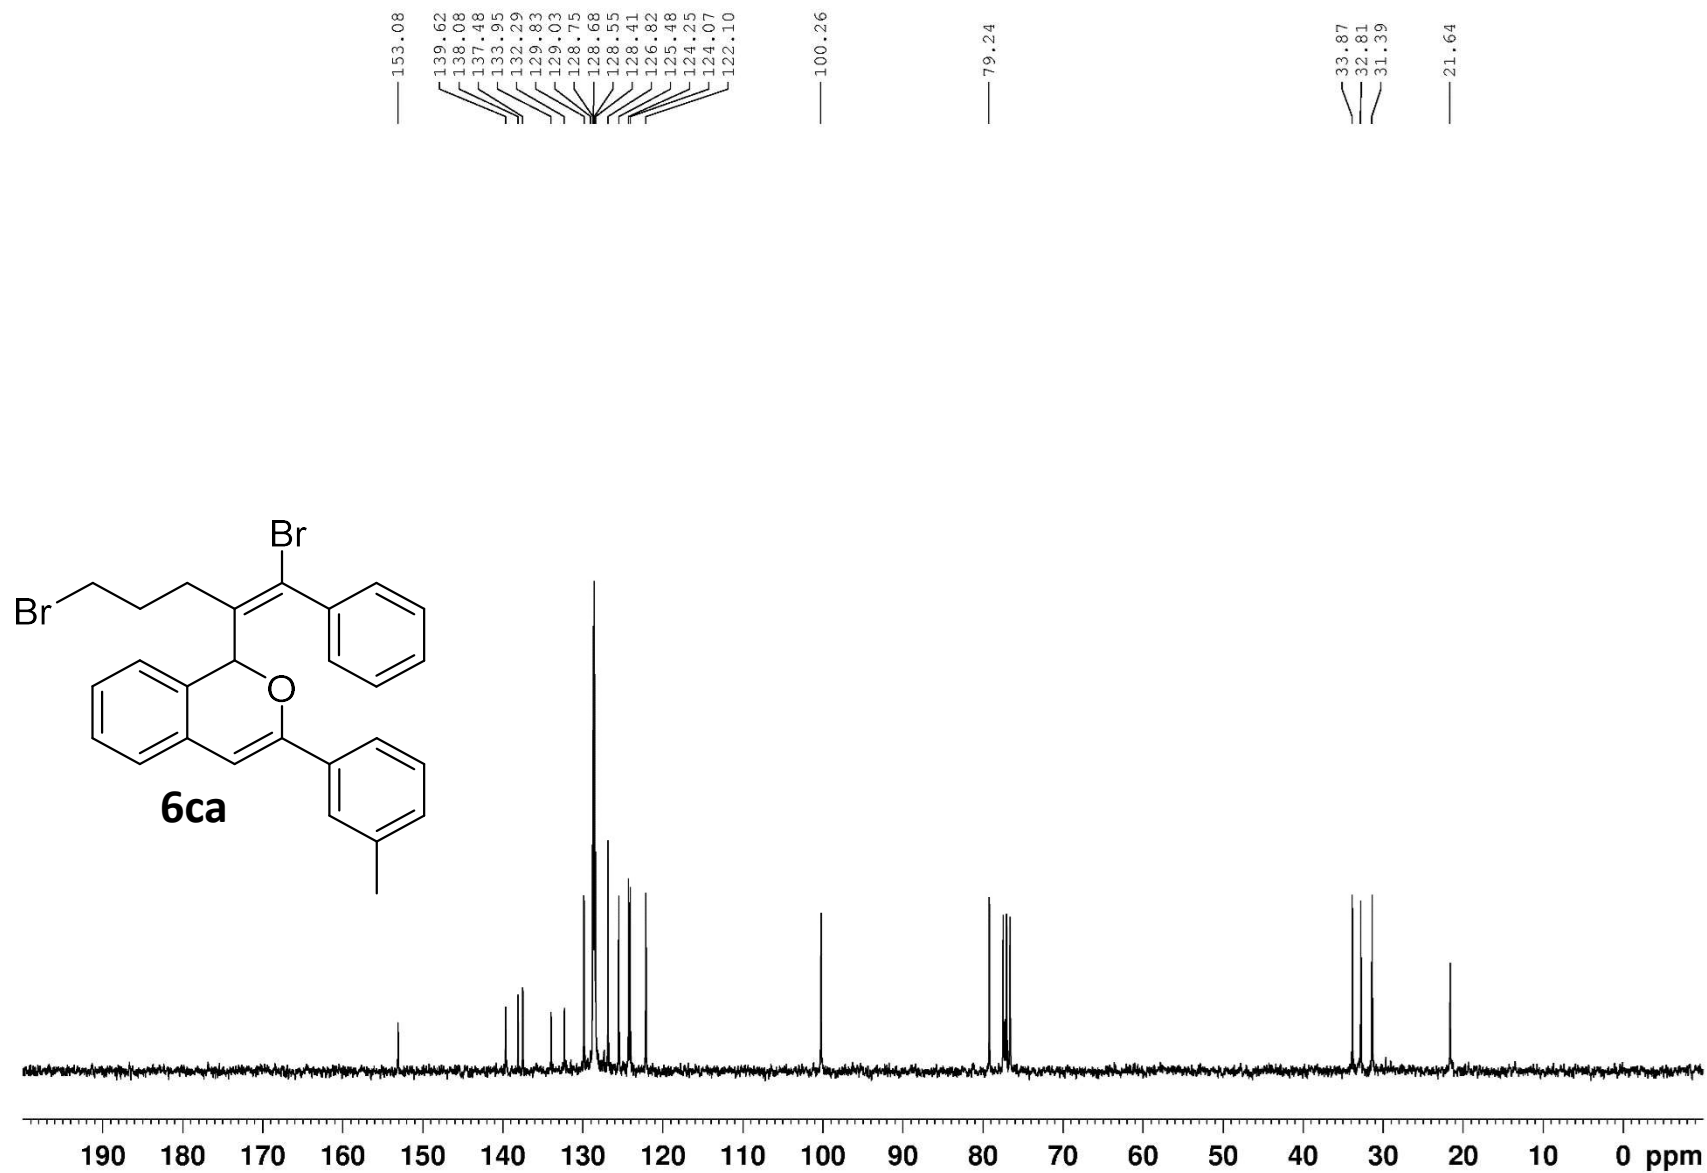

$^{13}\text{C}\{^1\text{H}\}$  NMR of compound **6ca** (75 MHz,  $\text{CDCl}_3$ )



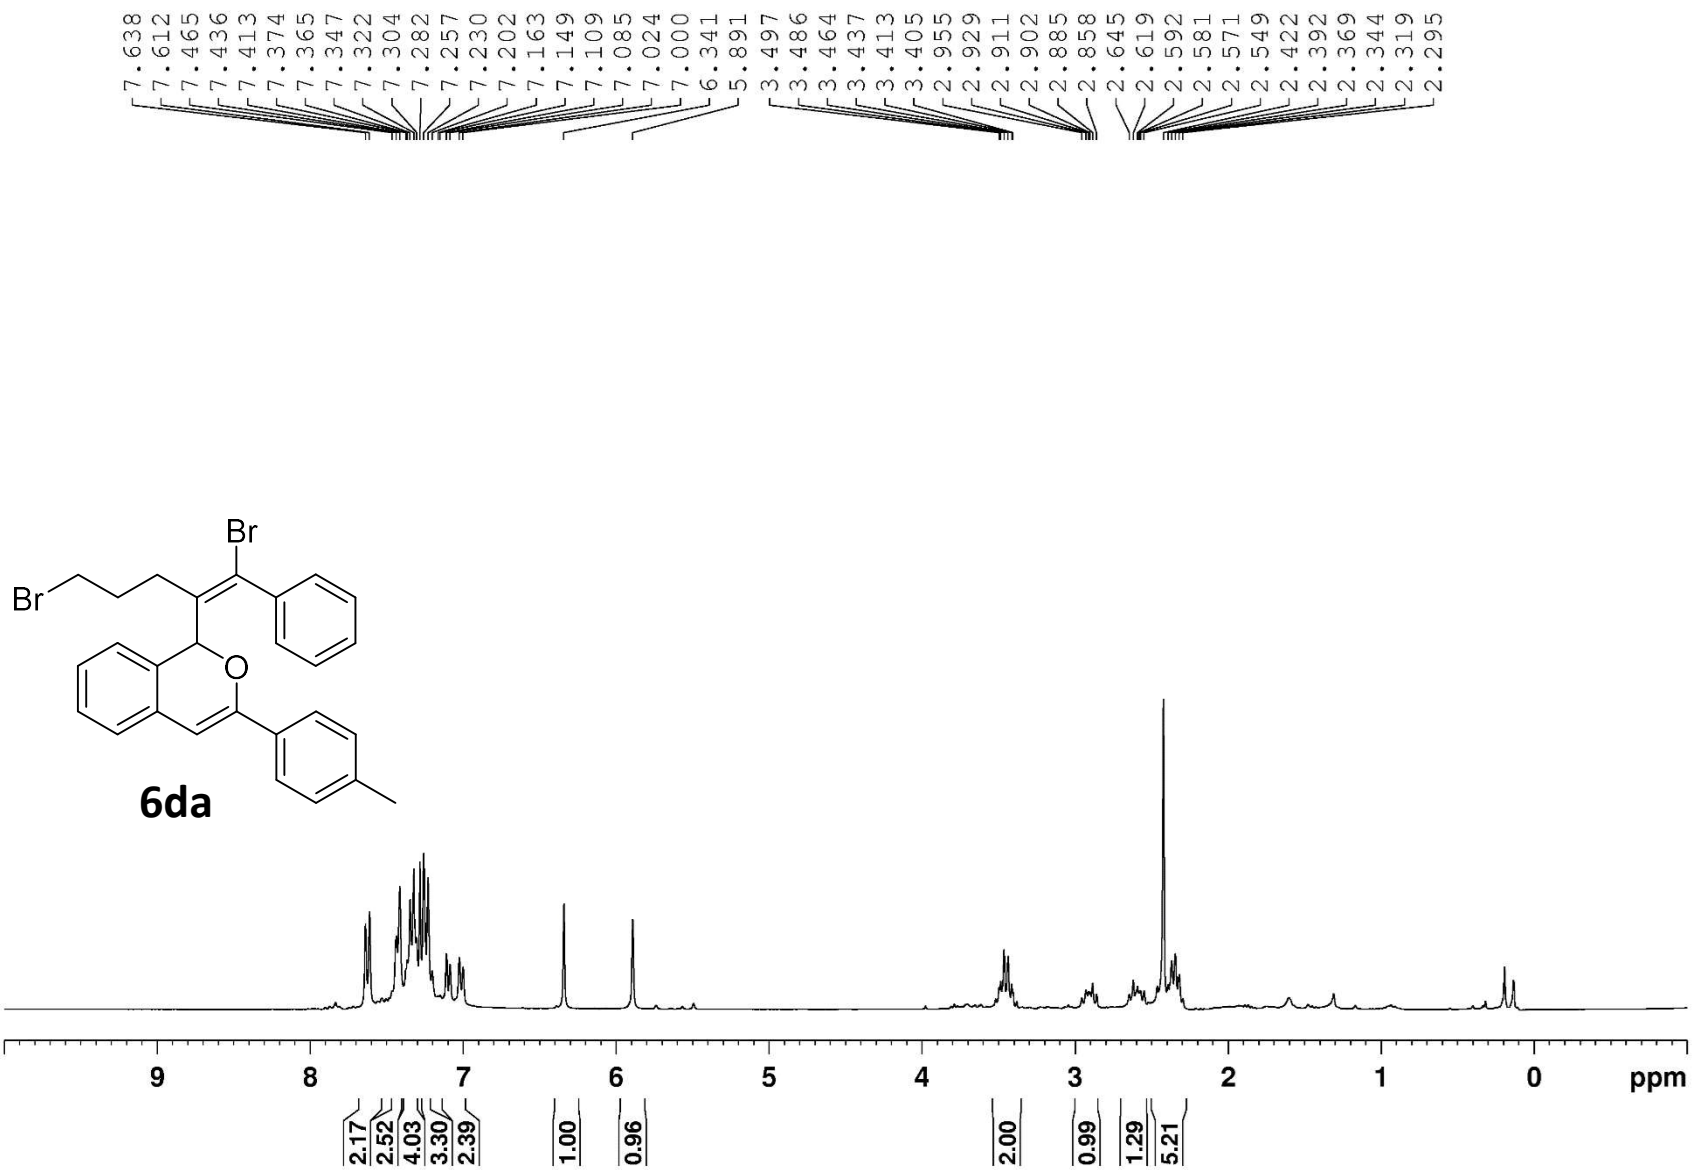

$^1\text{H}$  NMR of compound **6da** (300 MHz,  $\text{CDCl}_3$ )

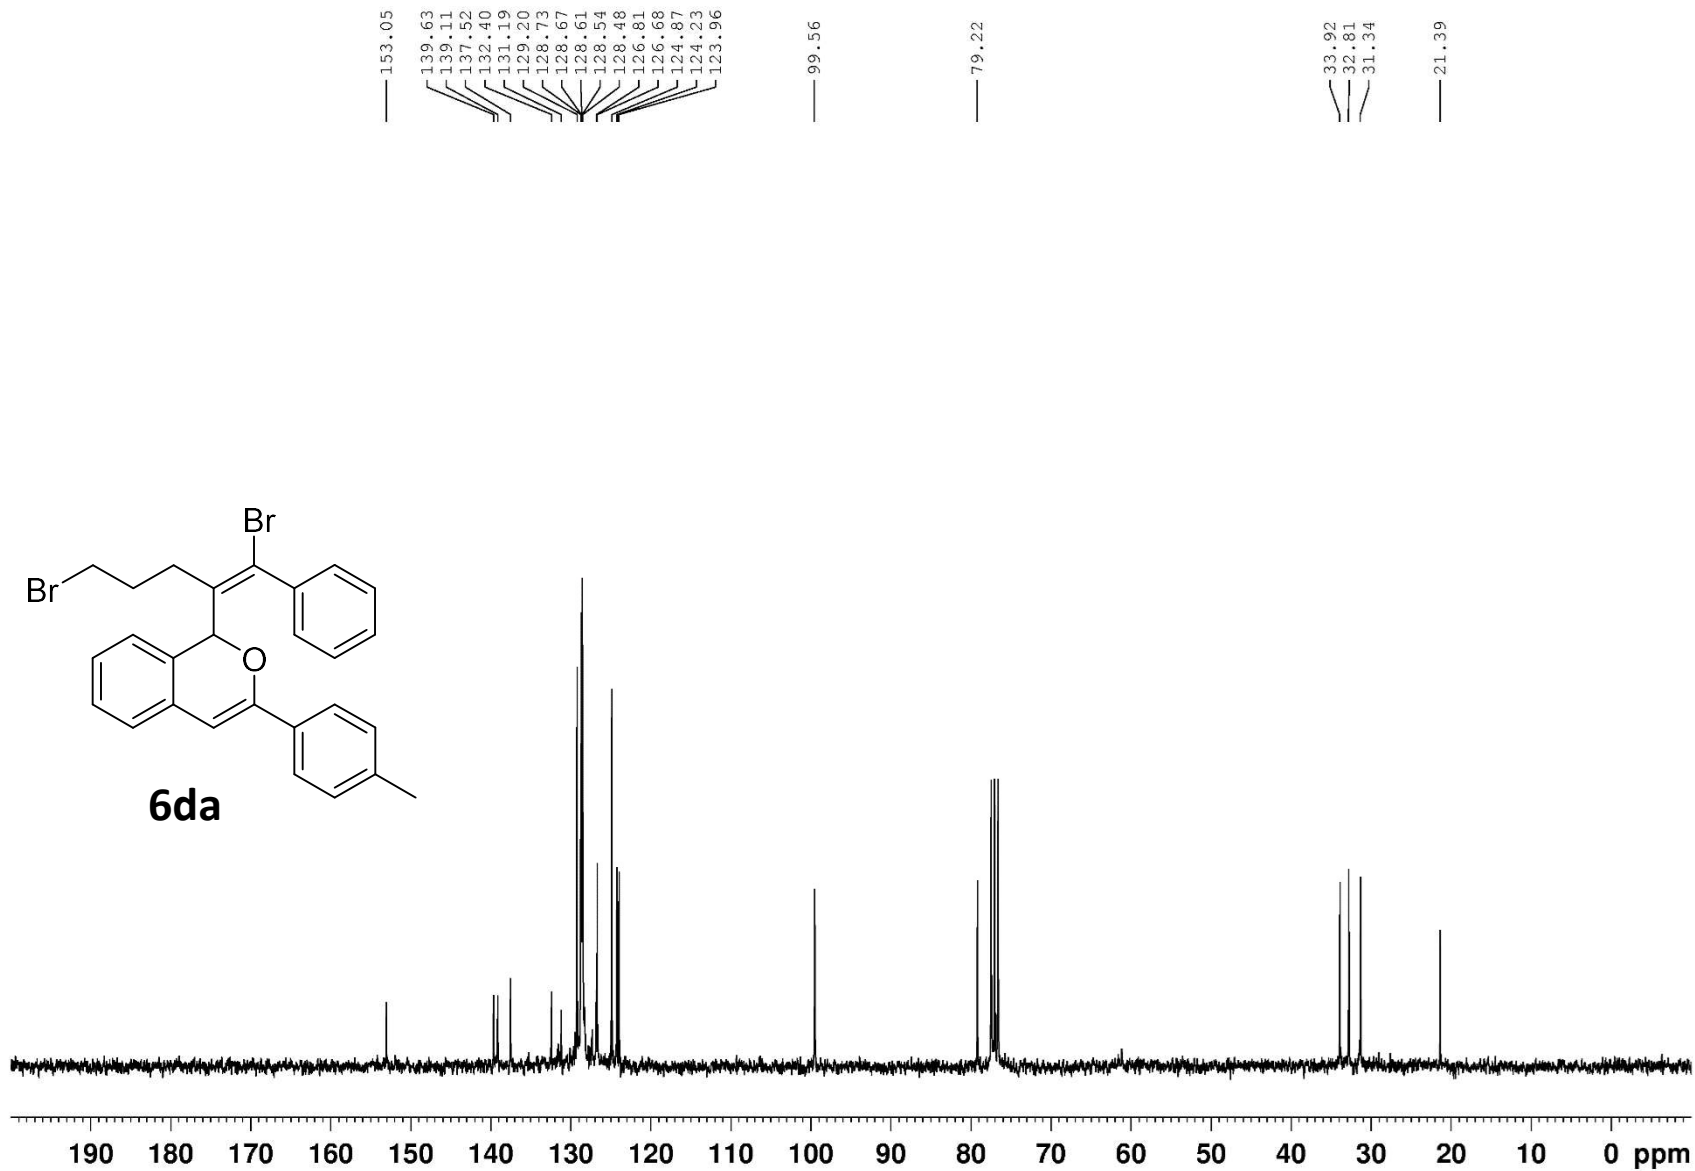

$^{13}\text{C}\{^1\text{H}\}$  NMR of compound **6da** (75 MHz,  $\text{CDCl}_3$ )

7.732  
7.727  
7.707  
7.701  
7.424  
7.418  
7.398  
7.393  
7.383  
7.378  
7.372  
7.350  
7.331  
7.309  
7.282  
7.264  
7.258  
7.239  
7.234  
7.214  
7.209  
7.129  
7.124  
7.105  
7.101  
7.085  
7.083  
7.058  
7.035  
7.011  
6.997  
6.969  
6.773  
5.872  
3.941  
3.513  
3.503  
3.481  
3.455  
3.432  
3.422  
2.940  
2.929  
2.919  
2.908  
2.893  
2.865  
2.673  
2.650  
2.643  
2.630  
2.620  
2.612  
2.596  
2.401  
2.376  
2.351  
2.328

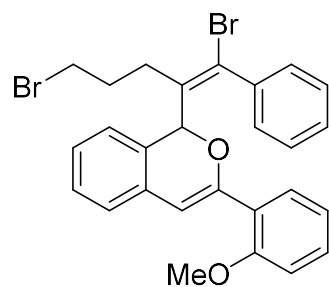

**6ea**

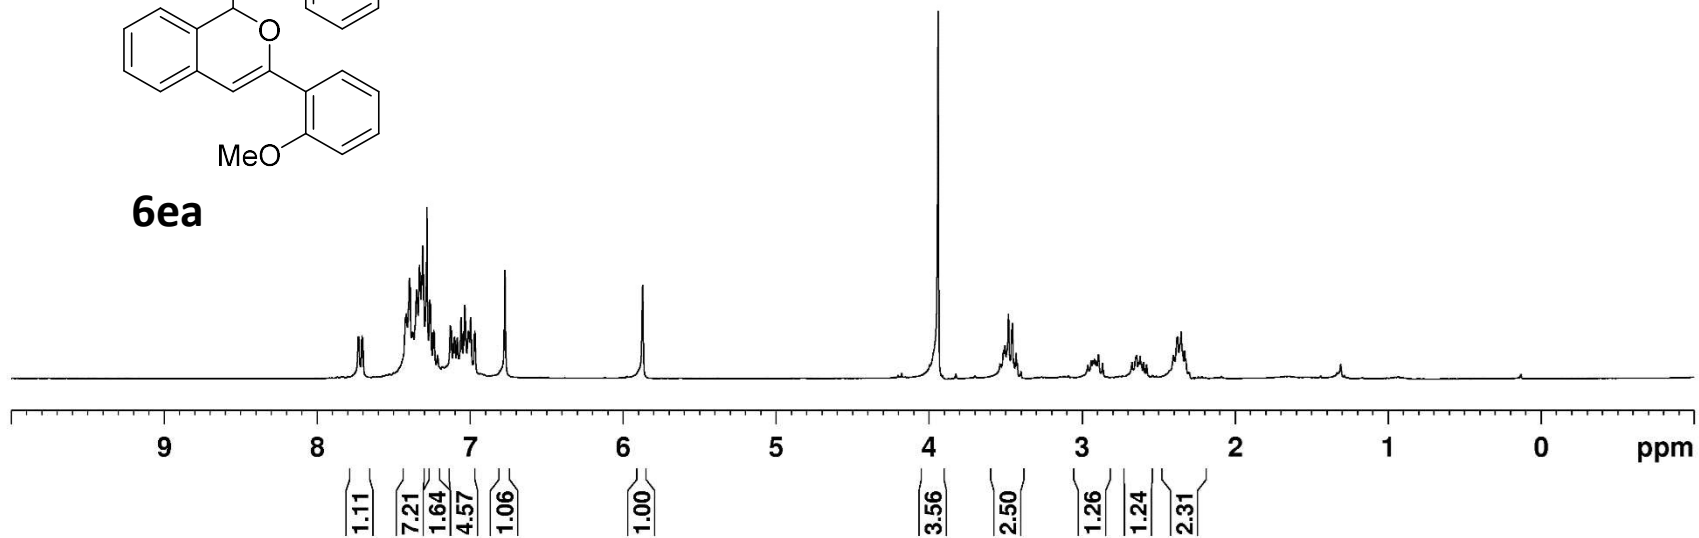

<sup>1</sup>H NMR of compound **6ea** (300 MHz, CDCl<sub>3</sub>)

2ome

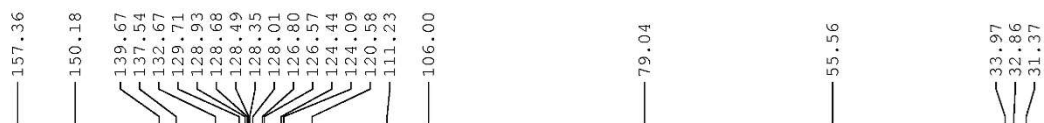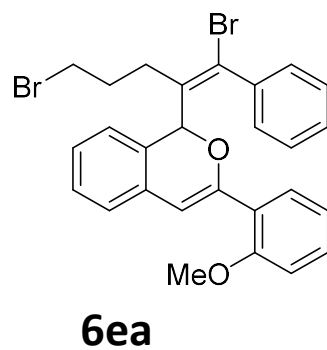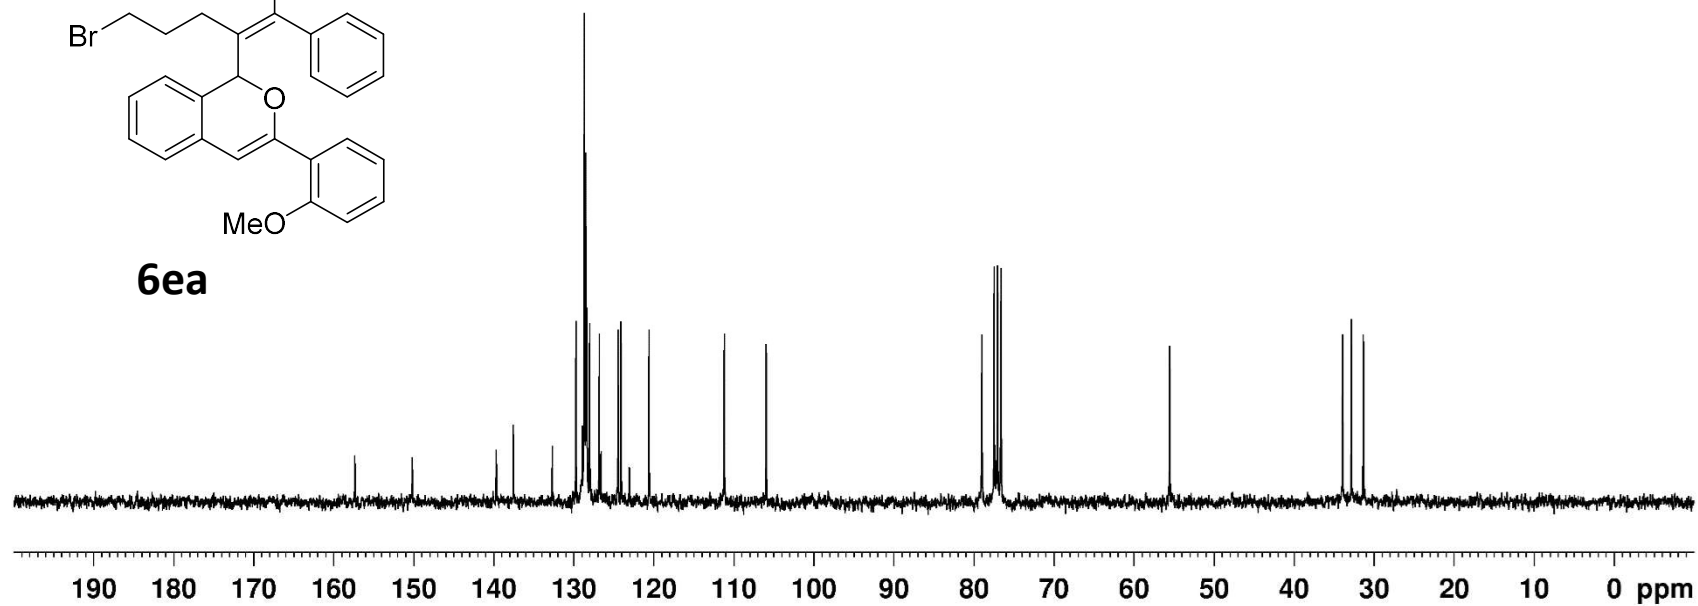

<sup>13</sup>C {<sup>1</sup>H} NMR of compound **6ea** (75 MHz, CDCl<sub>3</sub>)

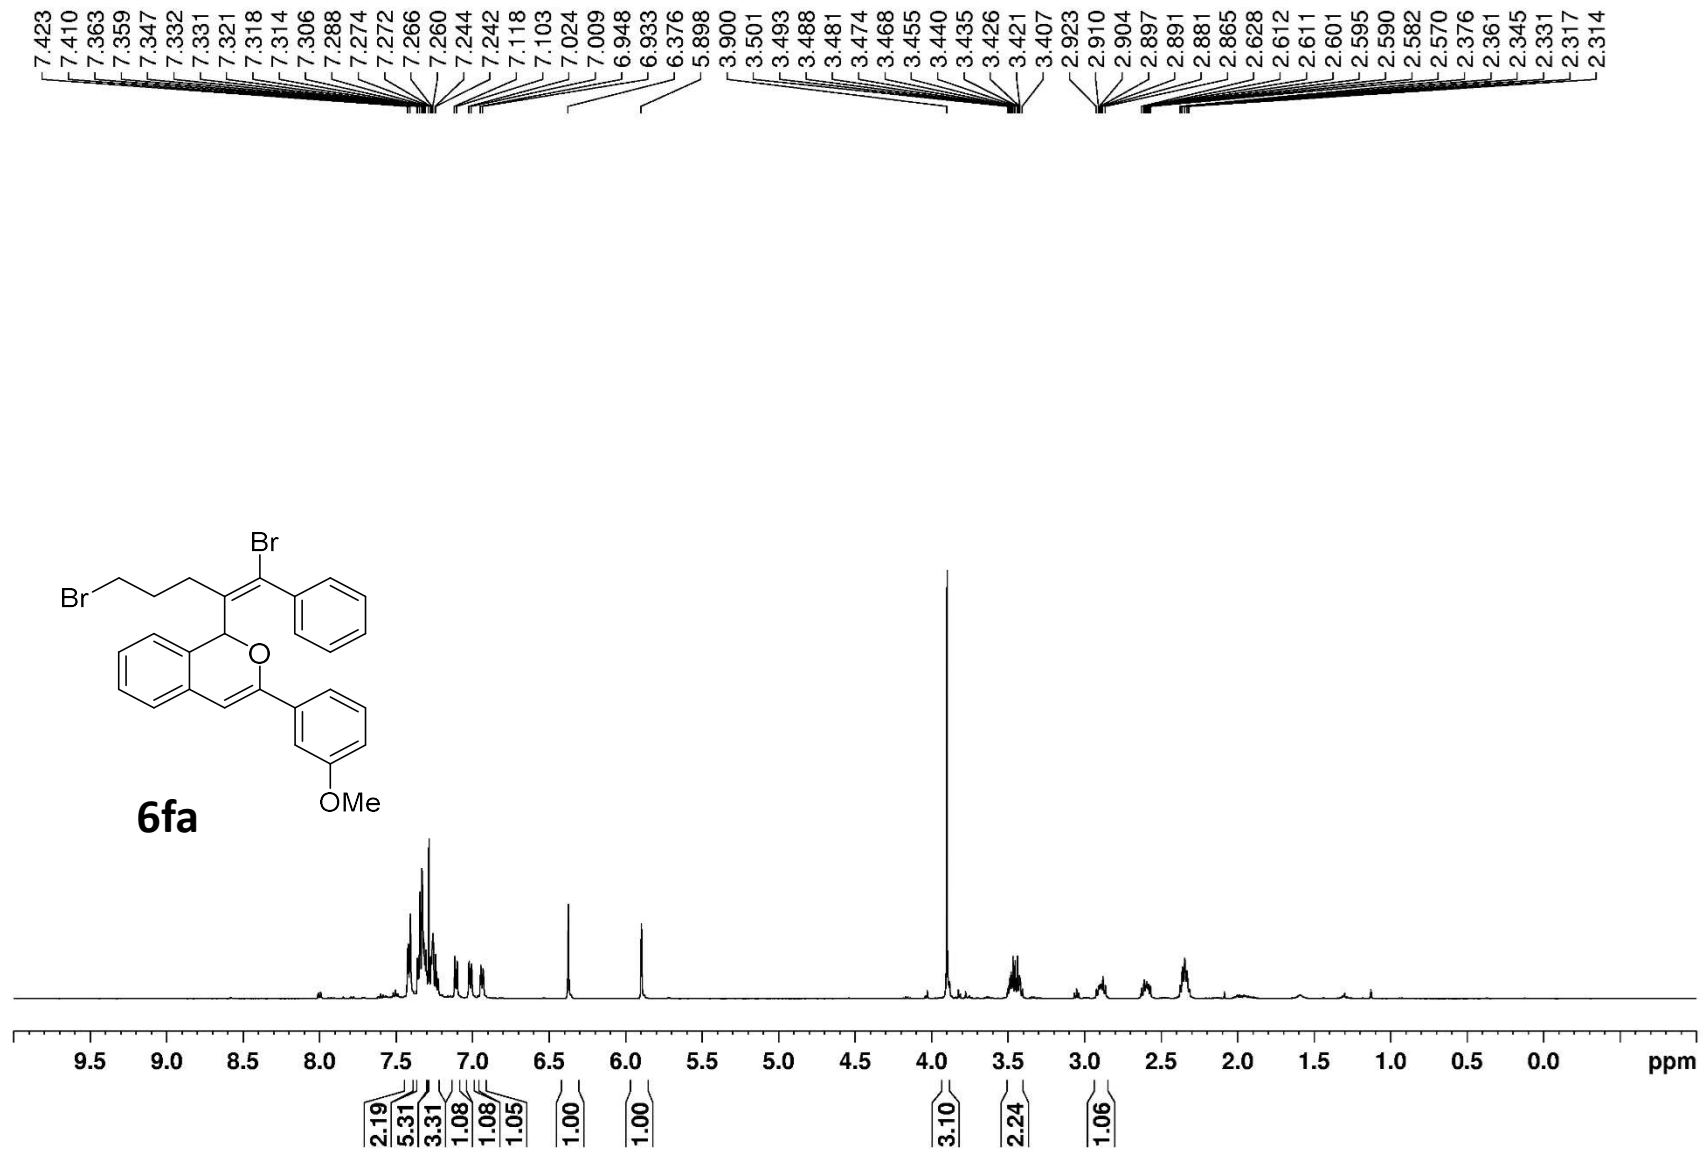

<sup>1</sup>H NMR of compound **6fa** (300 MHz, CDCl<sub>3</sub>)

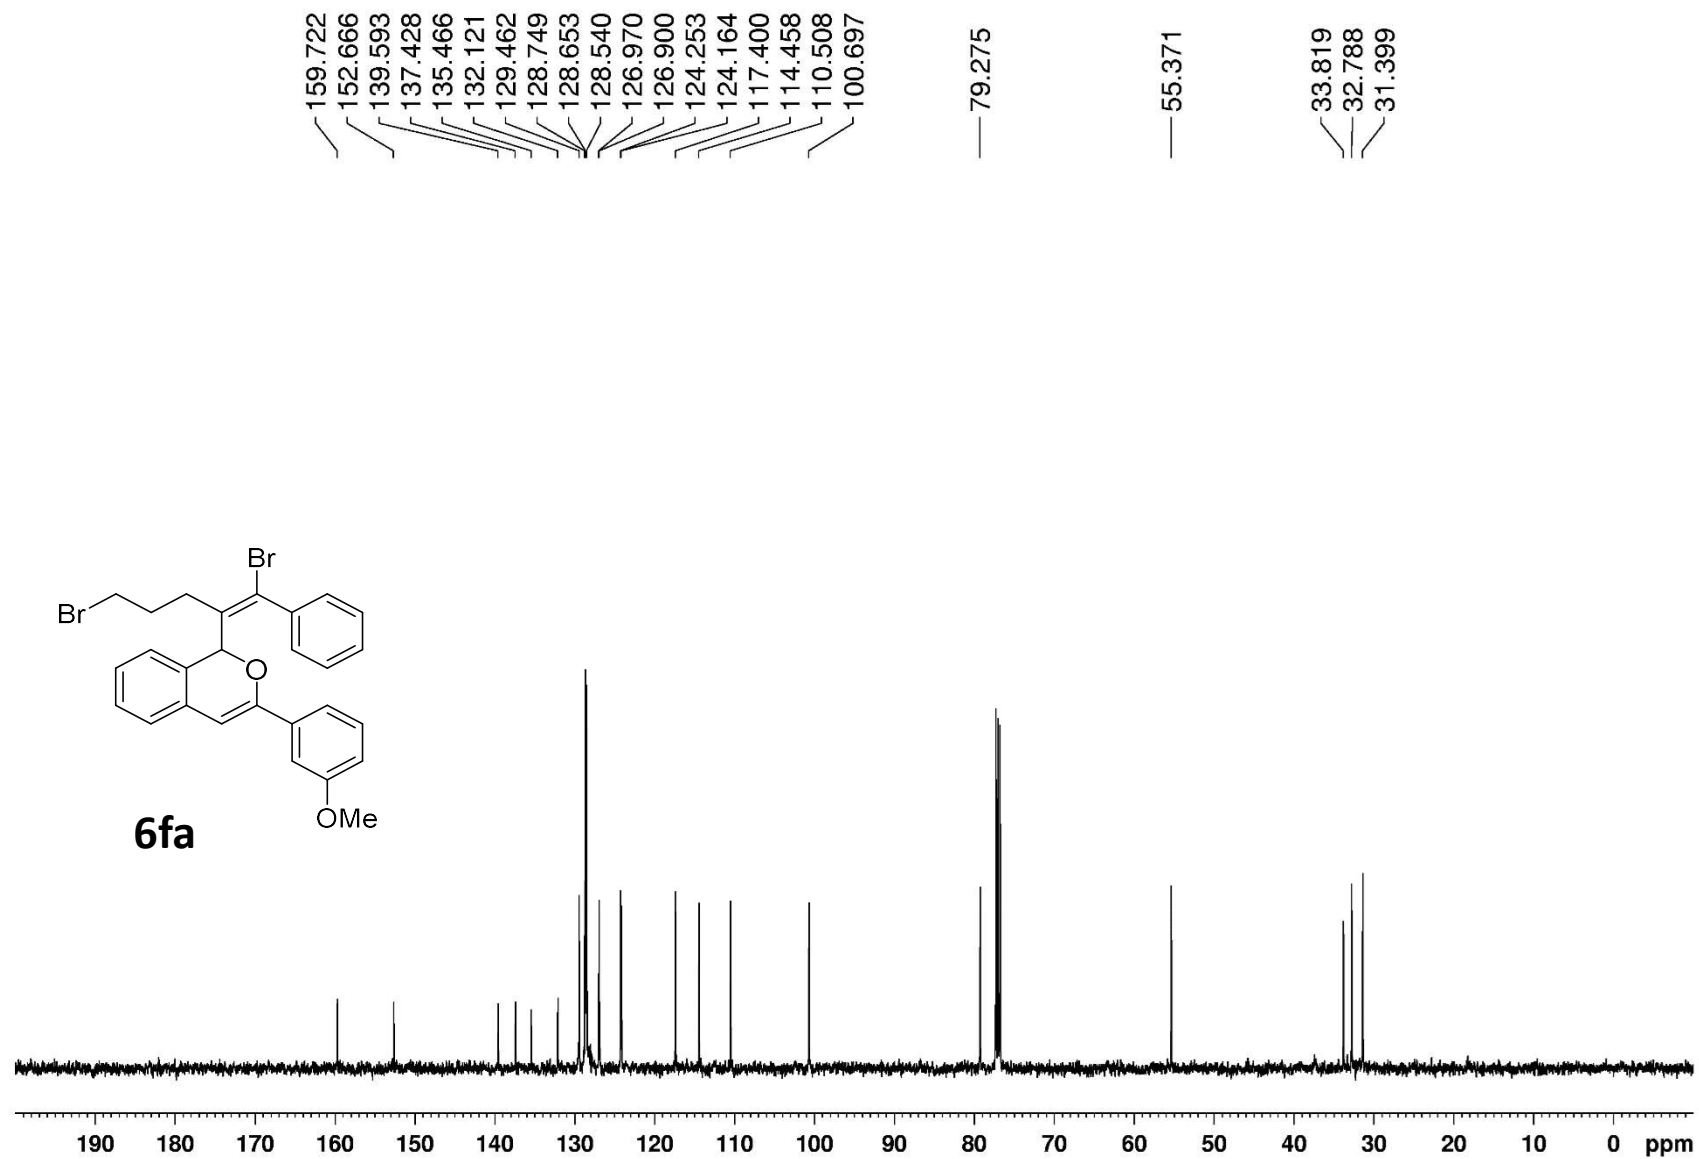

$^{13}\text{C}\{^1\text{H}\}$  NMR of compound **6fa** (75 MHz,  $\text{CDCl}_3$ )

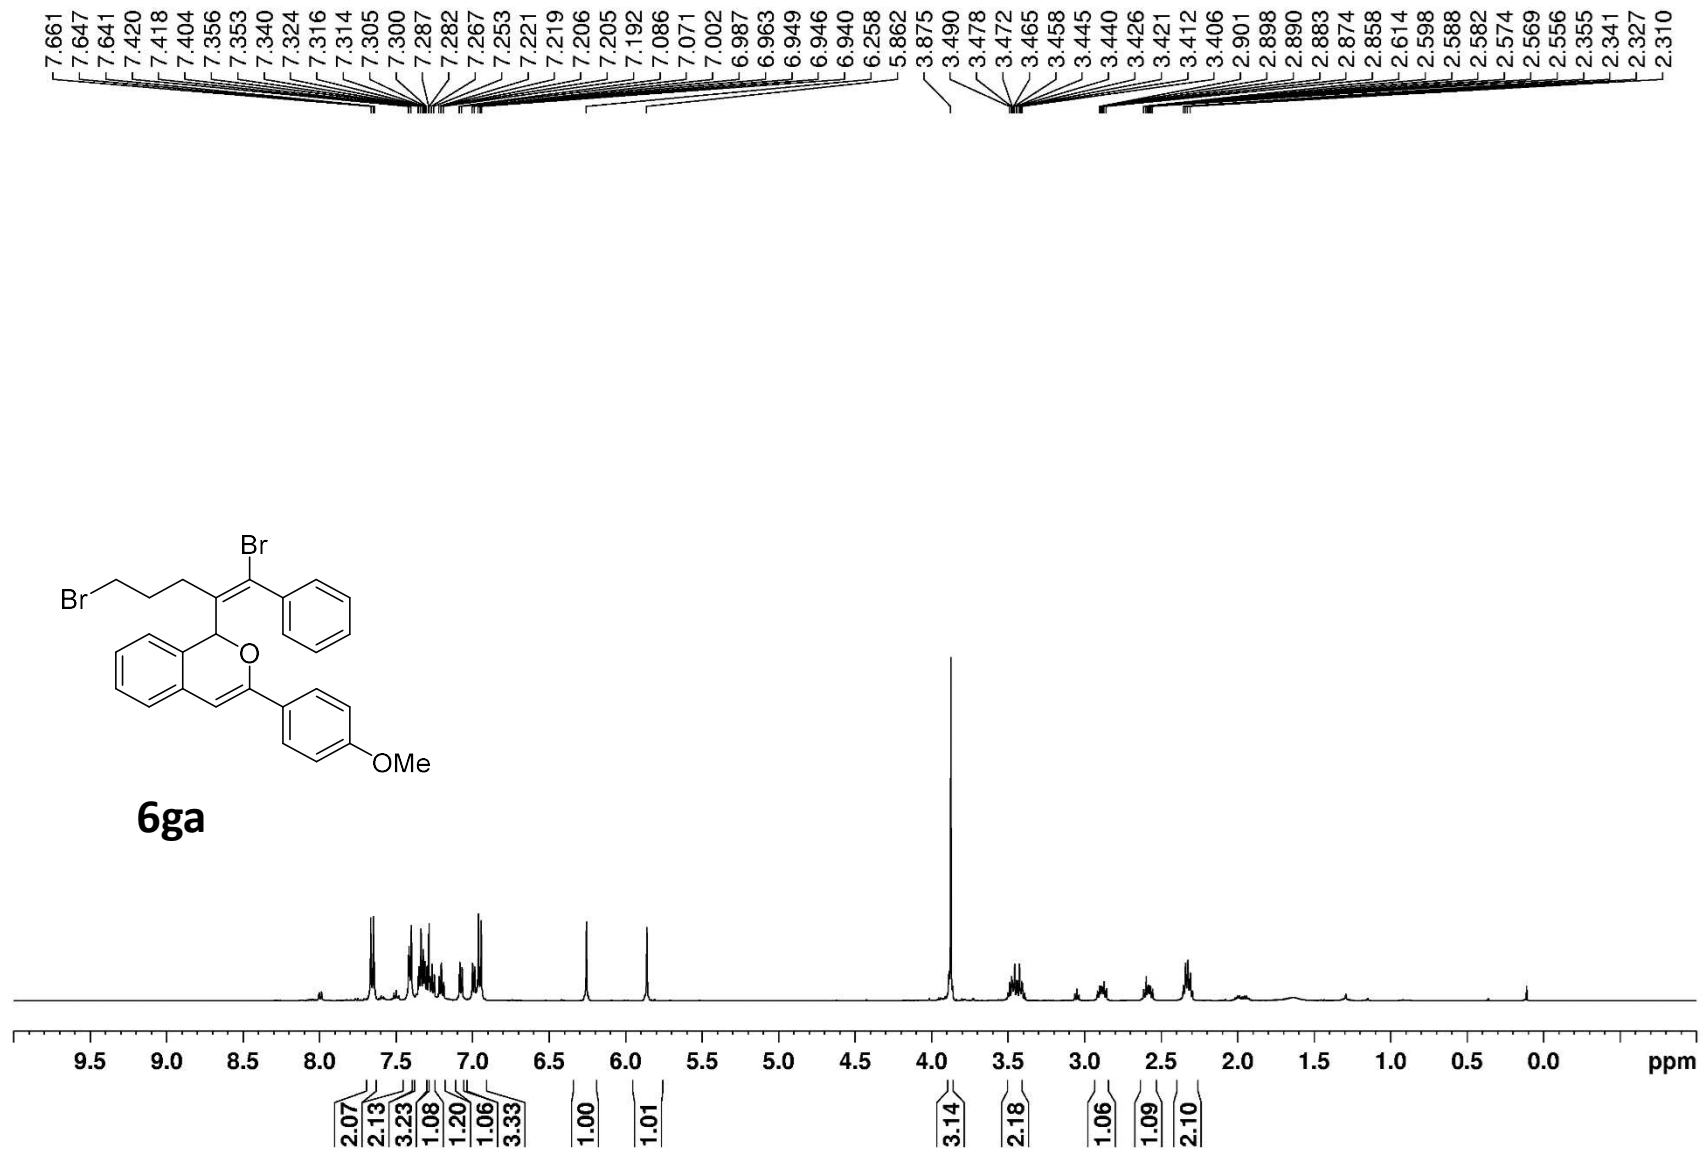

<sup>1</sup>H NMR of compound **6ga** (300 MHz, CDCl<sub>3</sub>)

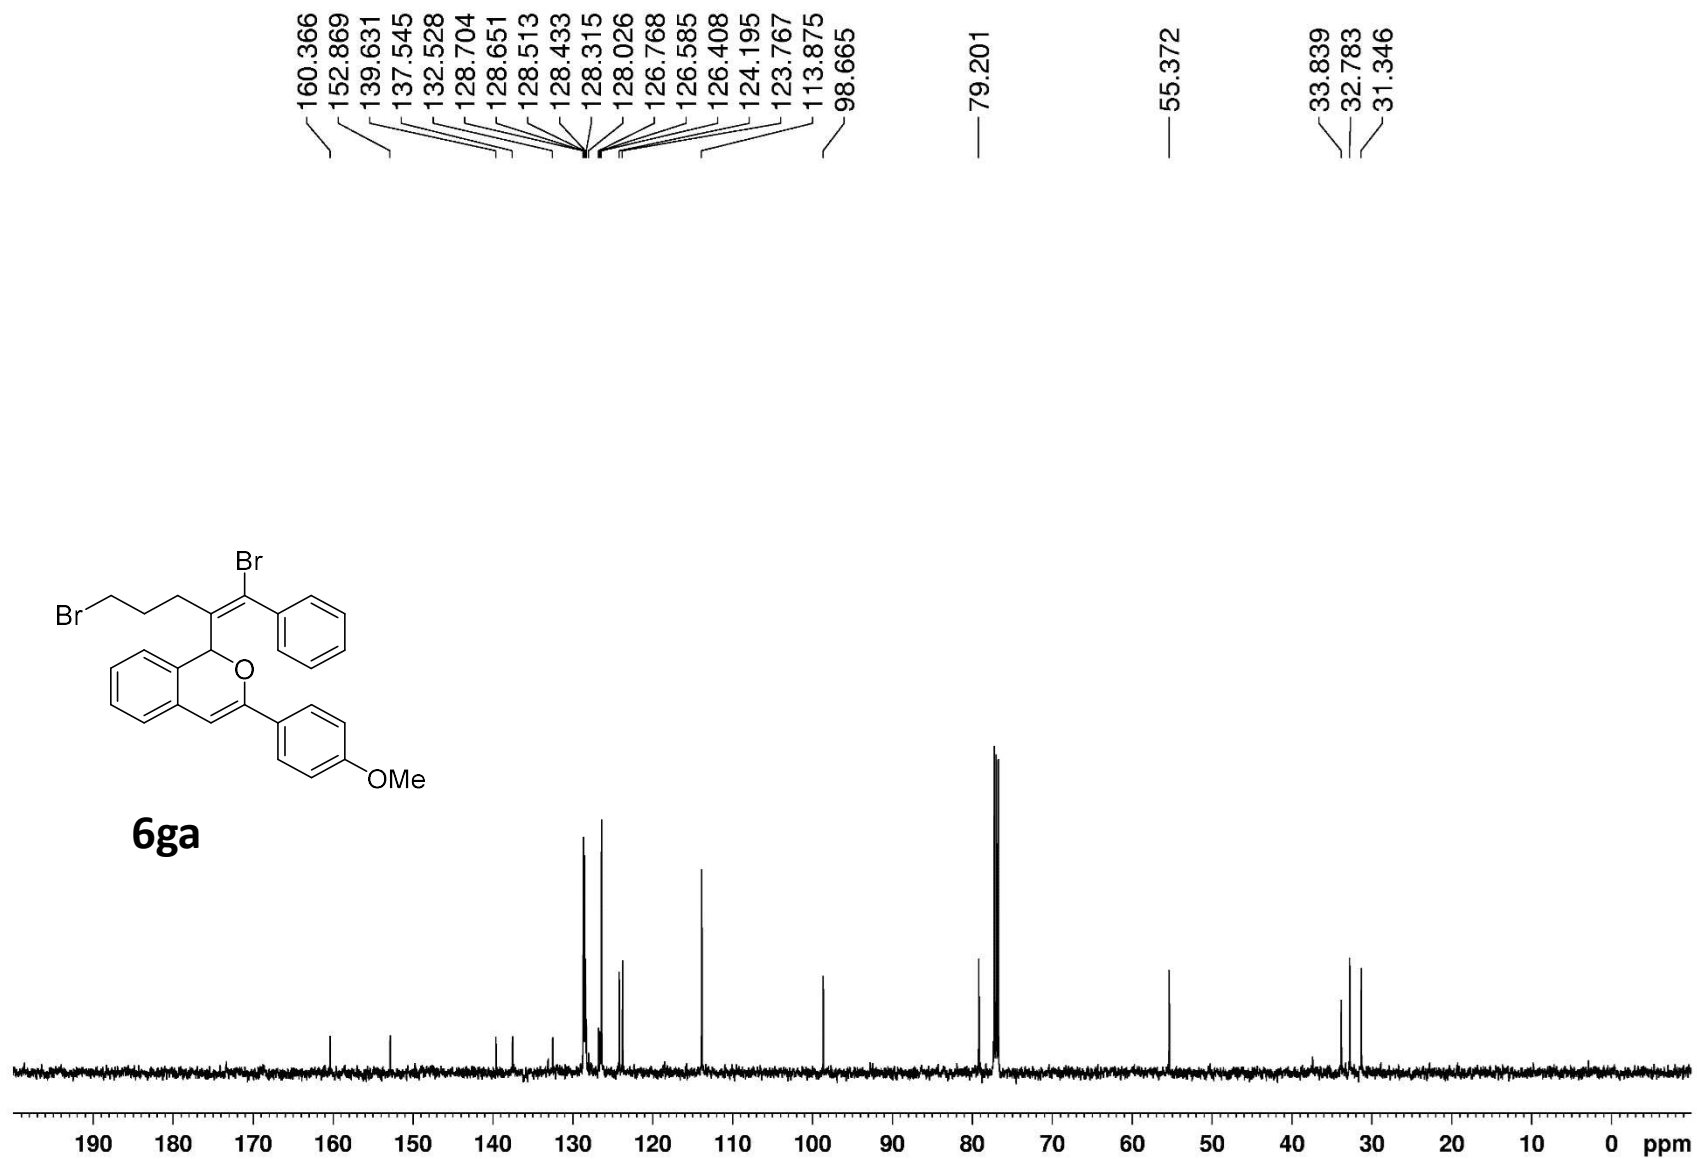

$^{13}\text{C}\{^1\text{H}\}$  NMR of compound **6ga** (75 MHz,  $\text{CDCl}_3$ )



7.718  
7.711  
7.699  
7.692  
7.688  
7.677  
7.670  
7.434  
7.429  
7.408  
7.403  
7.380  
7.371  
7.351  
7.327  
7.309  
7.282  
7.268  
7.262  
7.243  
7.238  
7.218  
7.214  
7.196  
7.146  
7.139  
7.116  
7.088  
7.027  
7.004  
6.304  
5.904  
3.506  
3.485  
3.475  
3.453  
3.437  
3.414  
3.404  
2.935  
2.906  
2.892  
2.881  
2.872  
2.858  
2.838  
2.642  
2.620  
2.610  
2.599  
2.588  
2.573  
2.545  
2.366  
2.342  
2.316  
2.308  
2.293

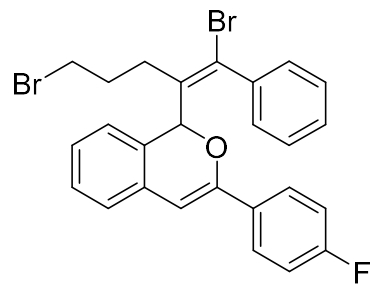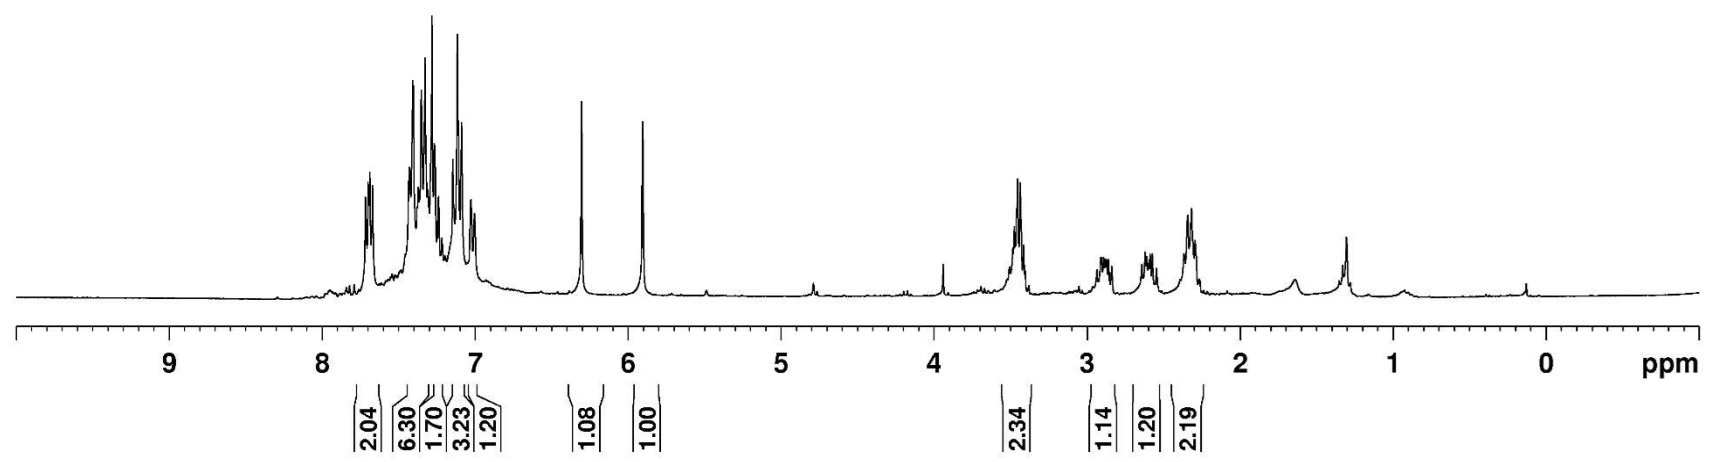

<sup>1</sup>H NMR of compound **6ha** (300 MHz, CDCl<sub>3</sub>)

4 f

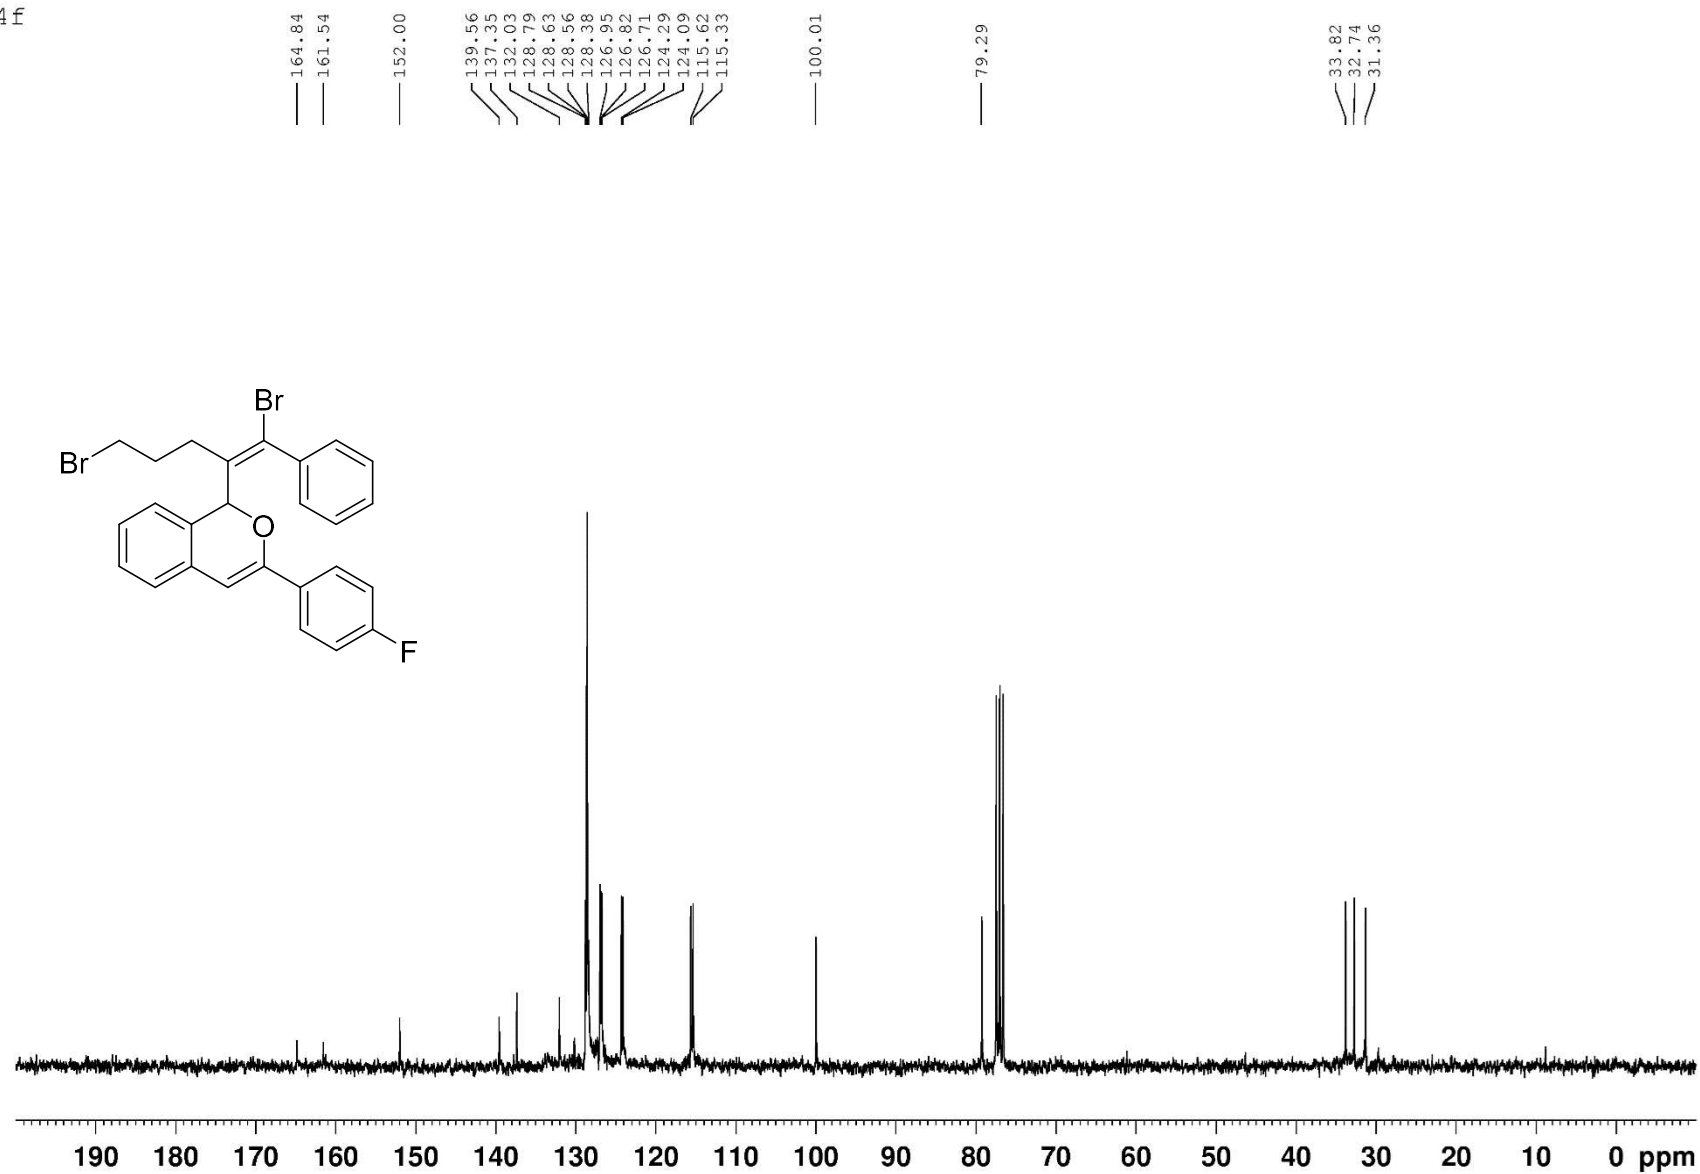

$^{13}\text{C}\{^1\text{H}\}$  NMR of compound **6ha** (75 MHz,  $\text{CDCl}_3$ )

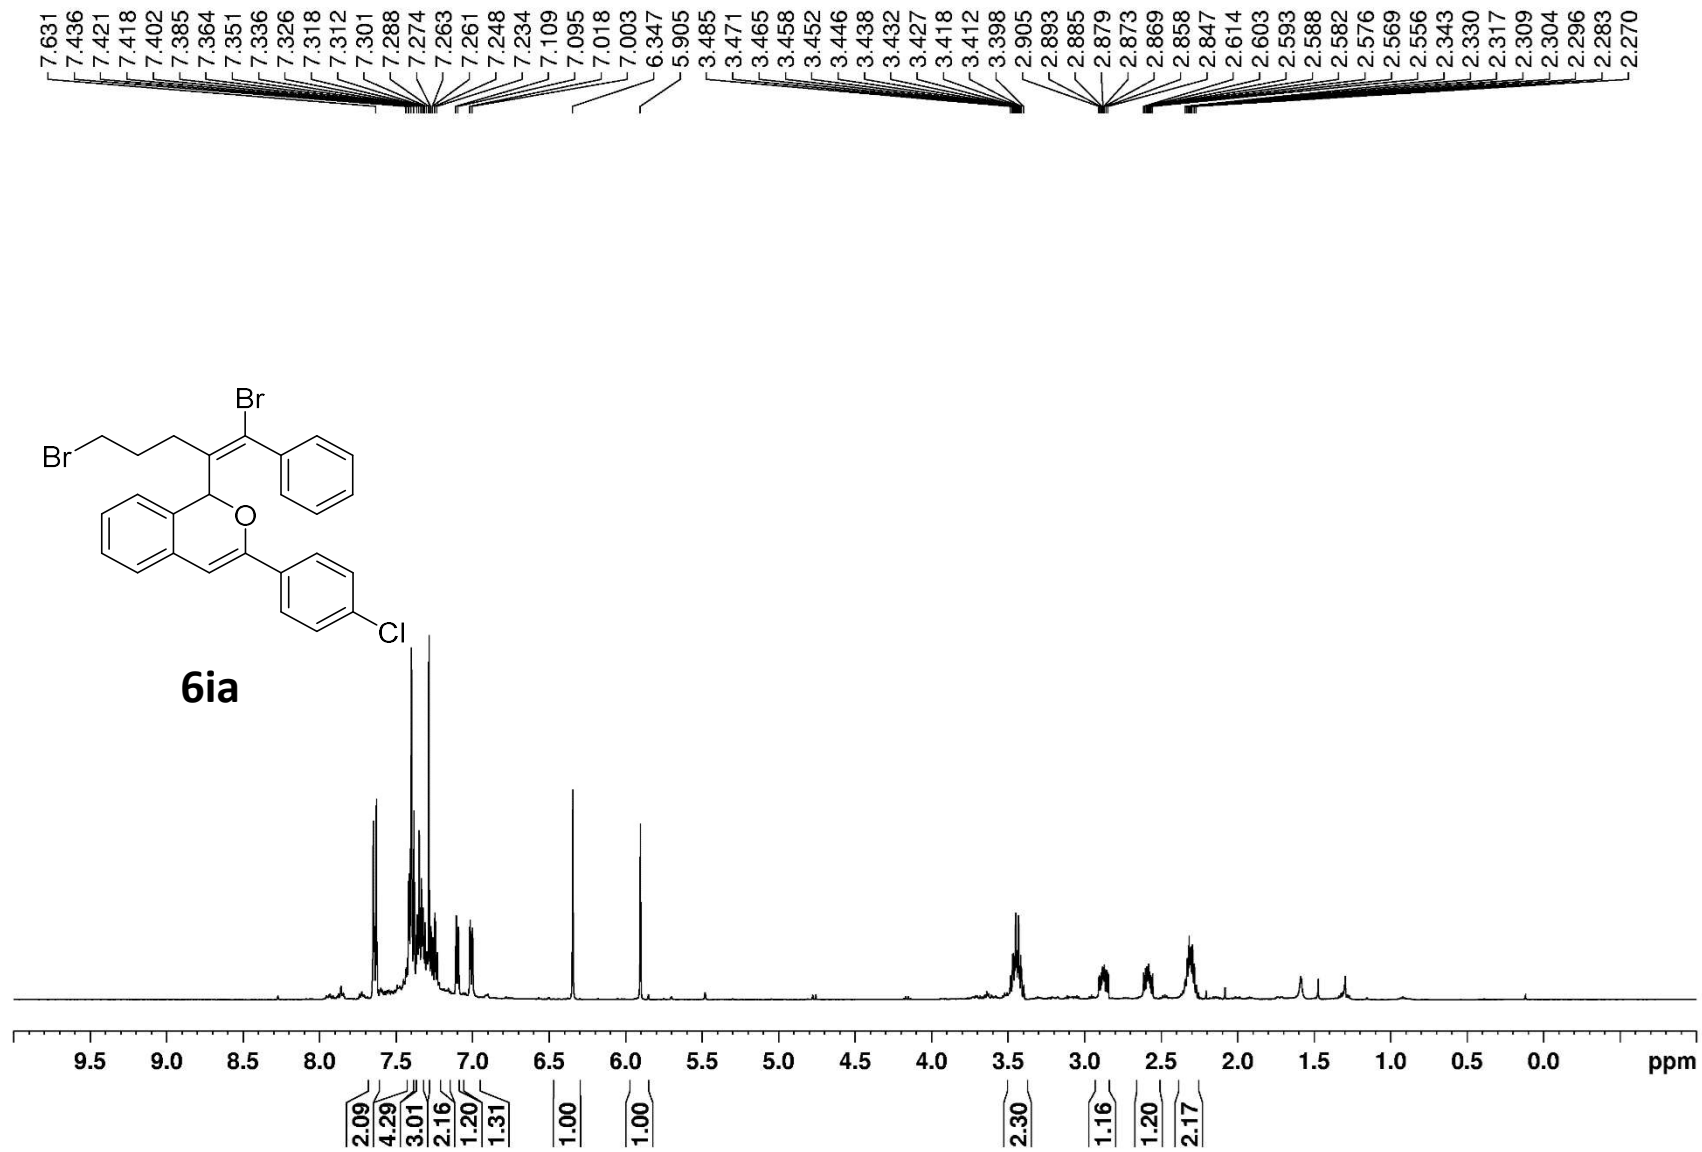

$^1\text{H NMR}$  of compound **6ia** (300 MHz,  $\text{CDCl}_3$ )

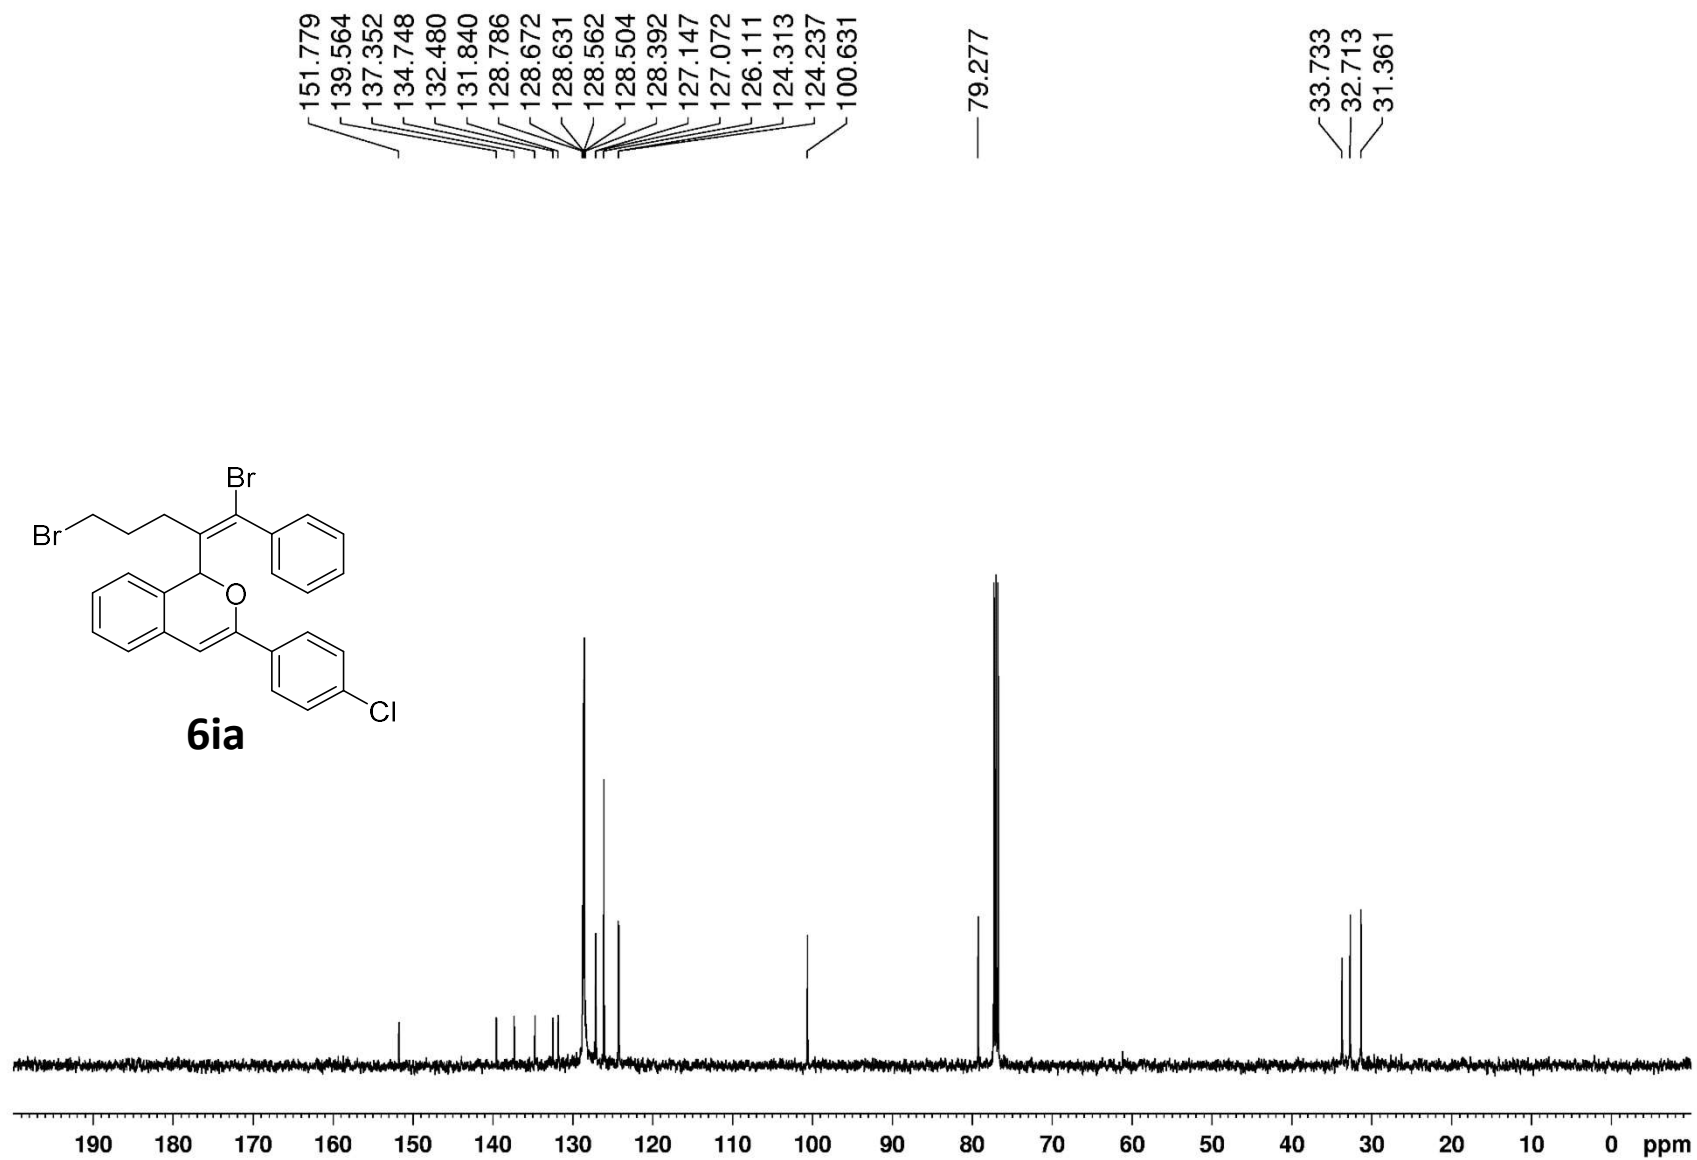

$^{13}\text{C}\{^1\text{H}\}$  NMR of compound **6ia** (75 MHz,  $\text{CDCl}_3$ )

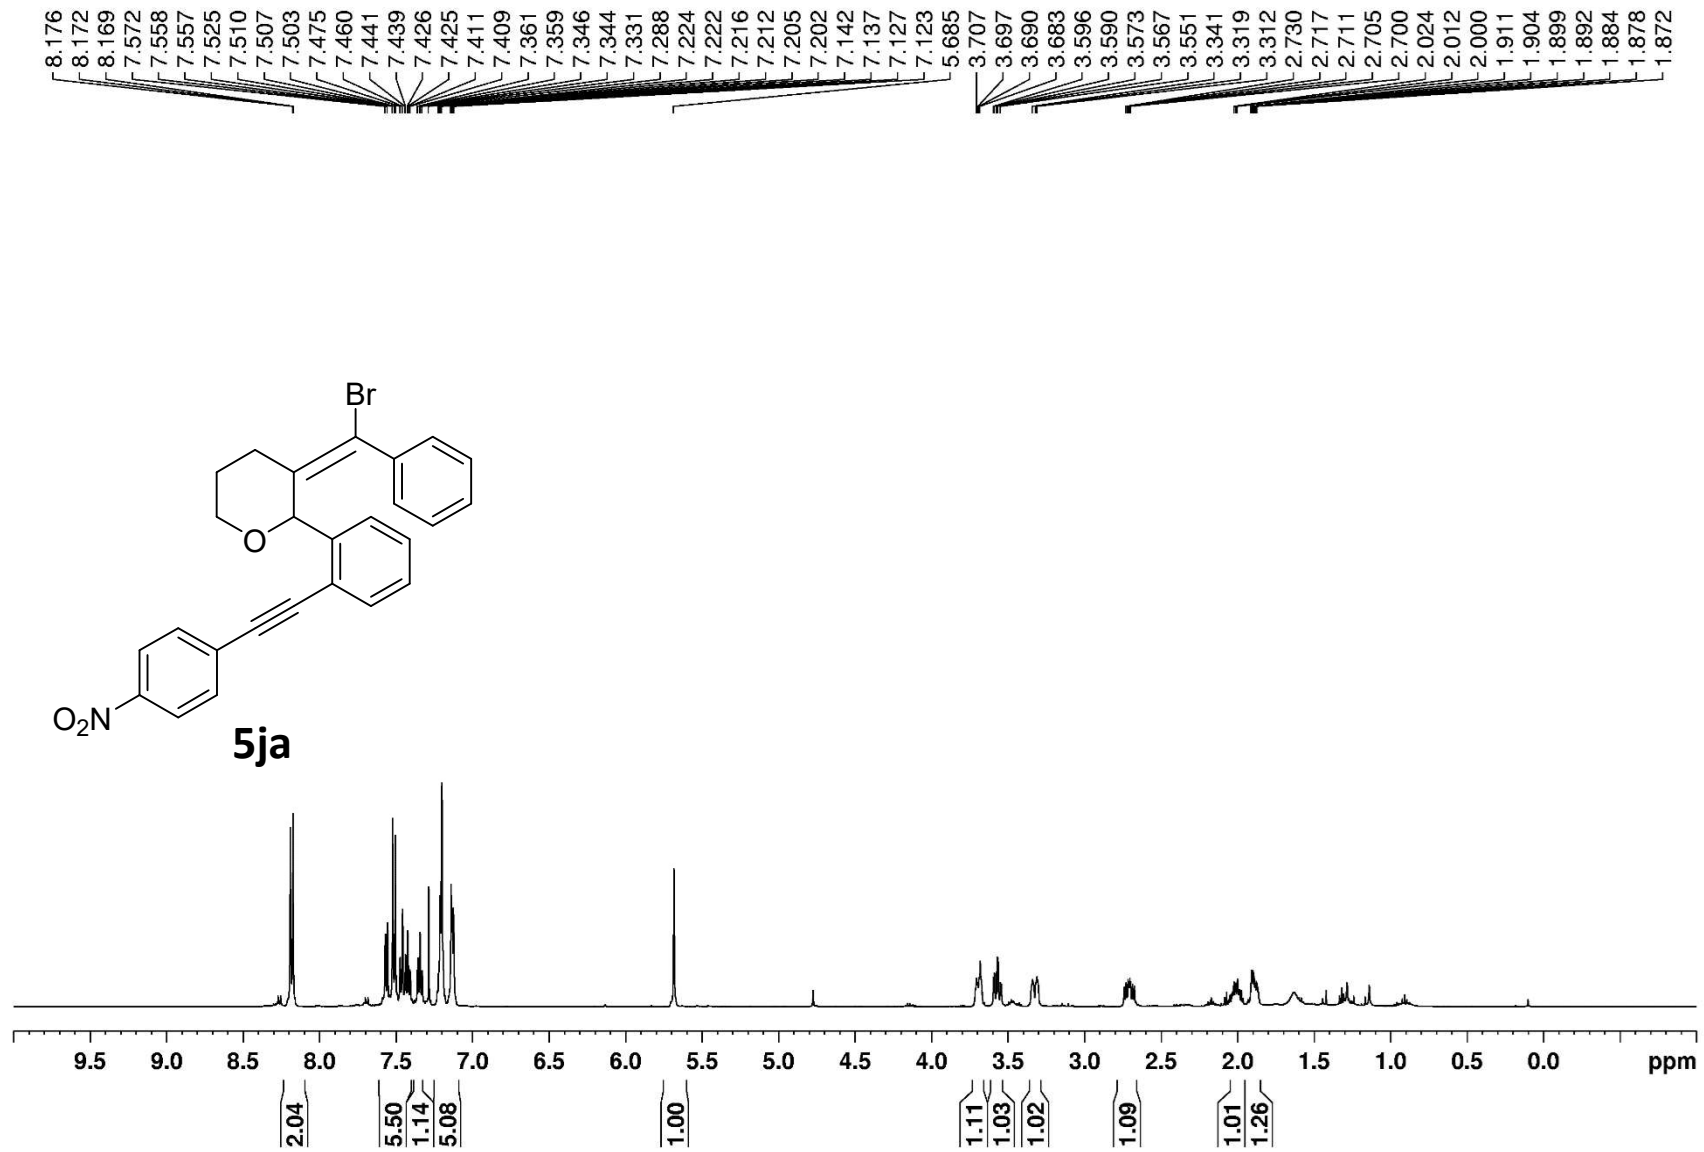

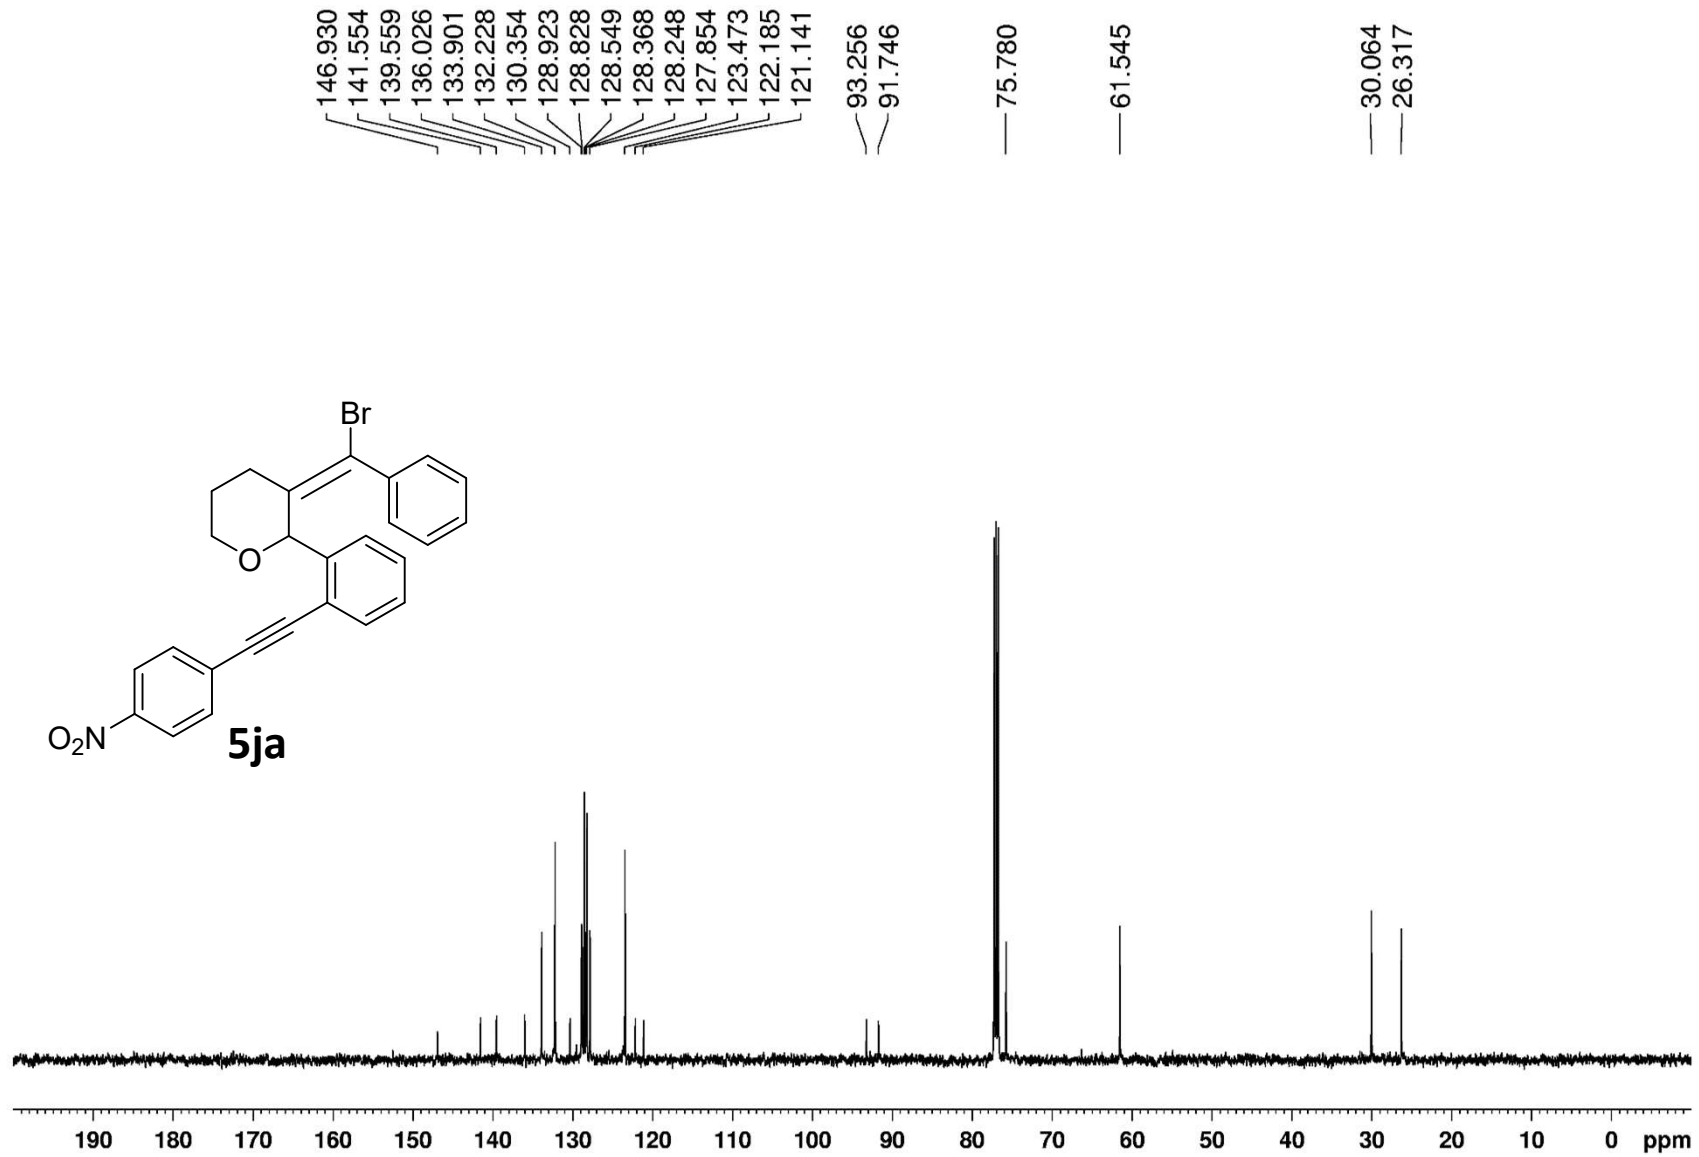

$^{13}\text{C}\{^1\text{H}\}$  NMR of compound **5ja** (75 MHz,  $\text{CDCl}_3$ )

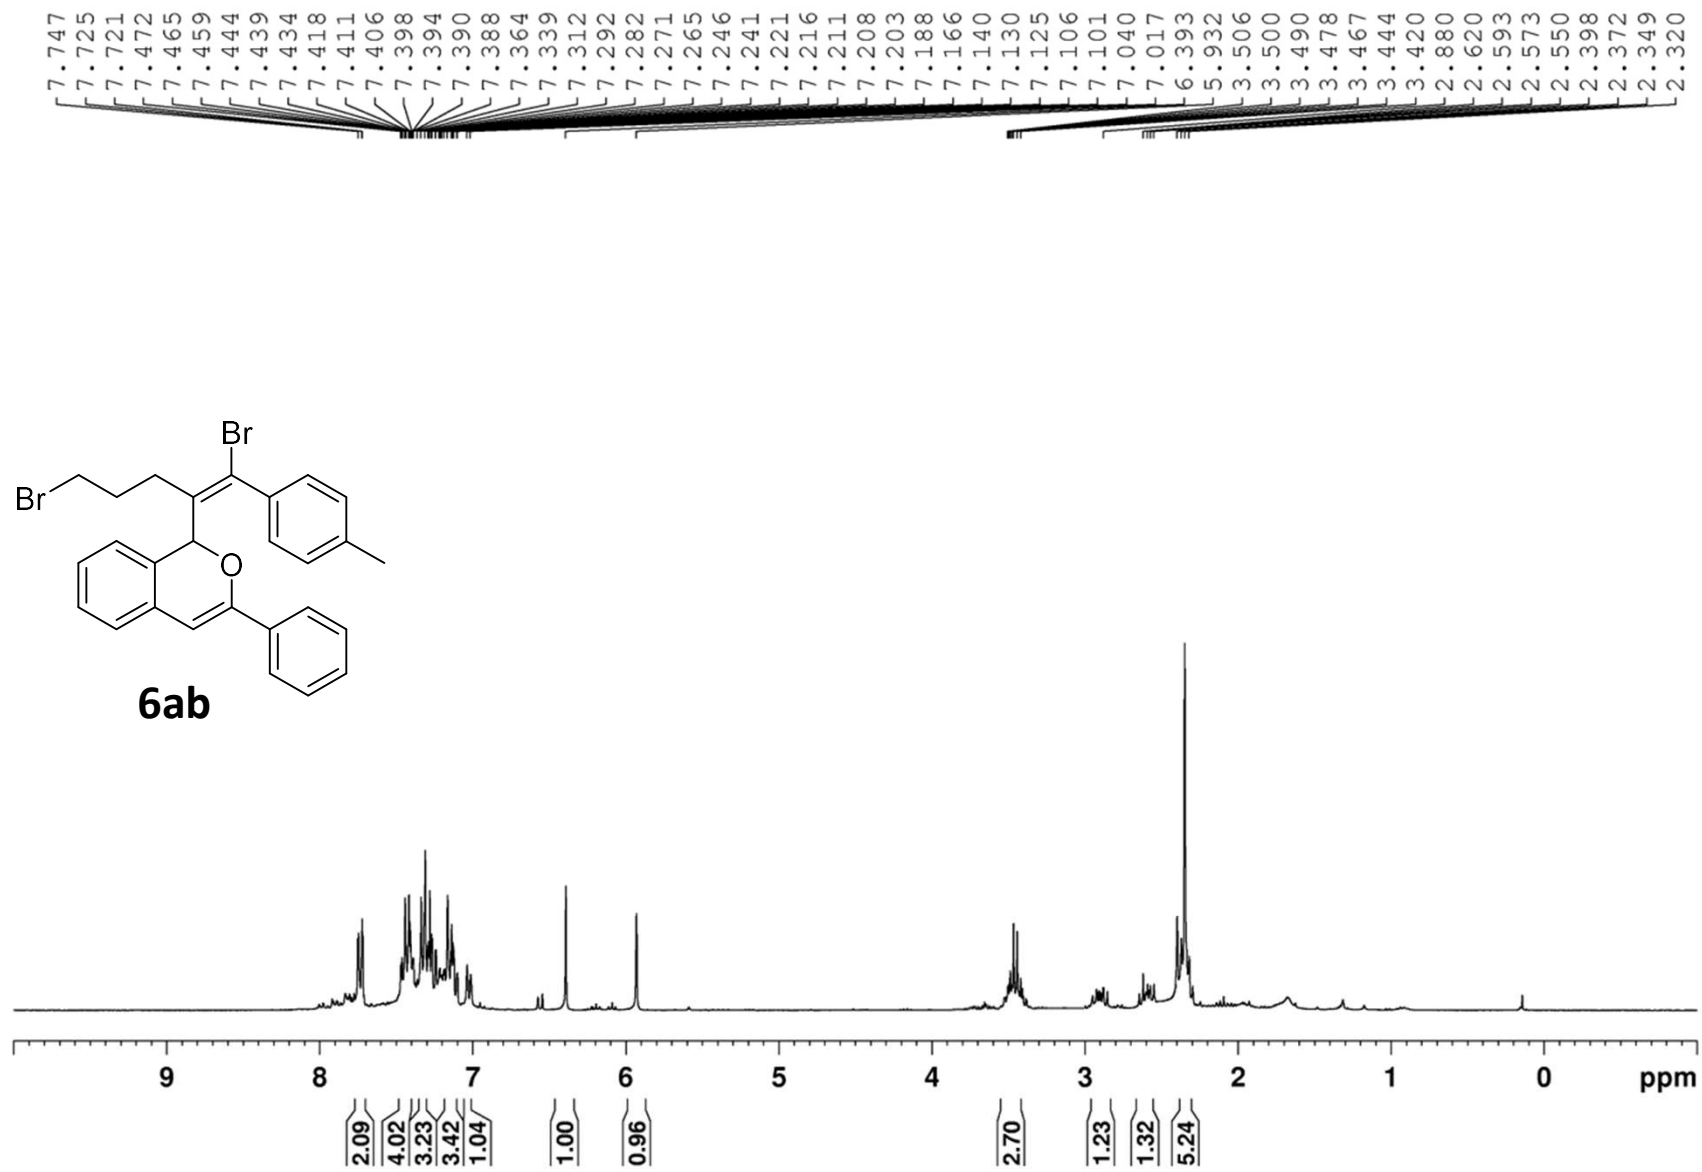

<sup>1</sup>H NMR of compound **6ab** (300 MHz, CDCl<sub>3</sub>)

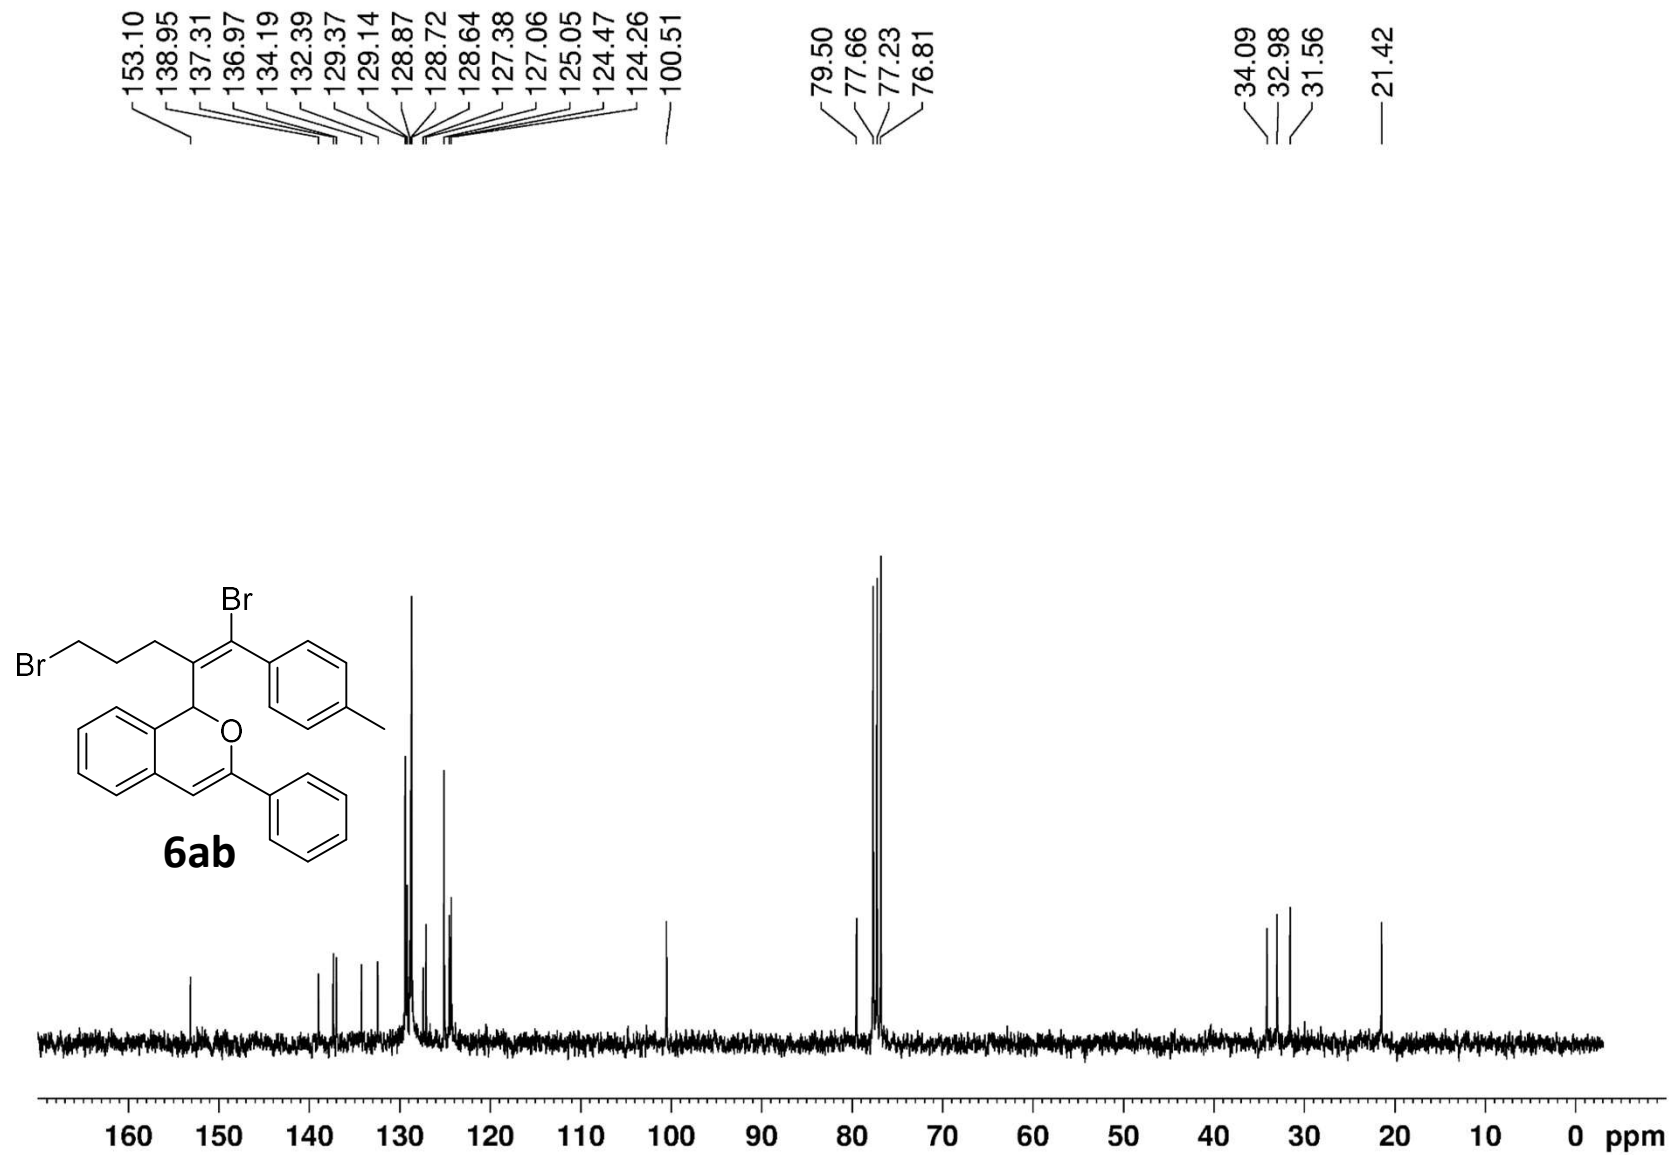

$^{13}\text{C}\{^1\text{H}\}$  NMR of compound **6ab** (75 MHz,  $\text{CDCl}_3$ )



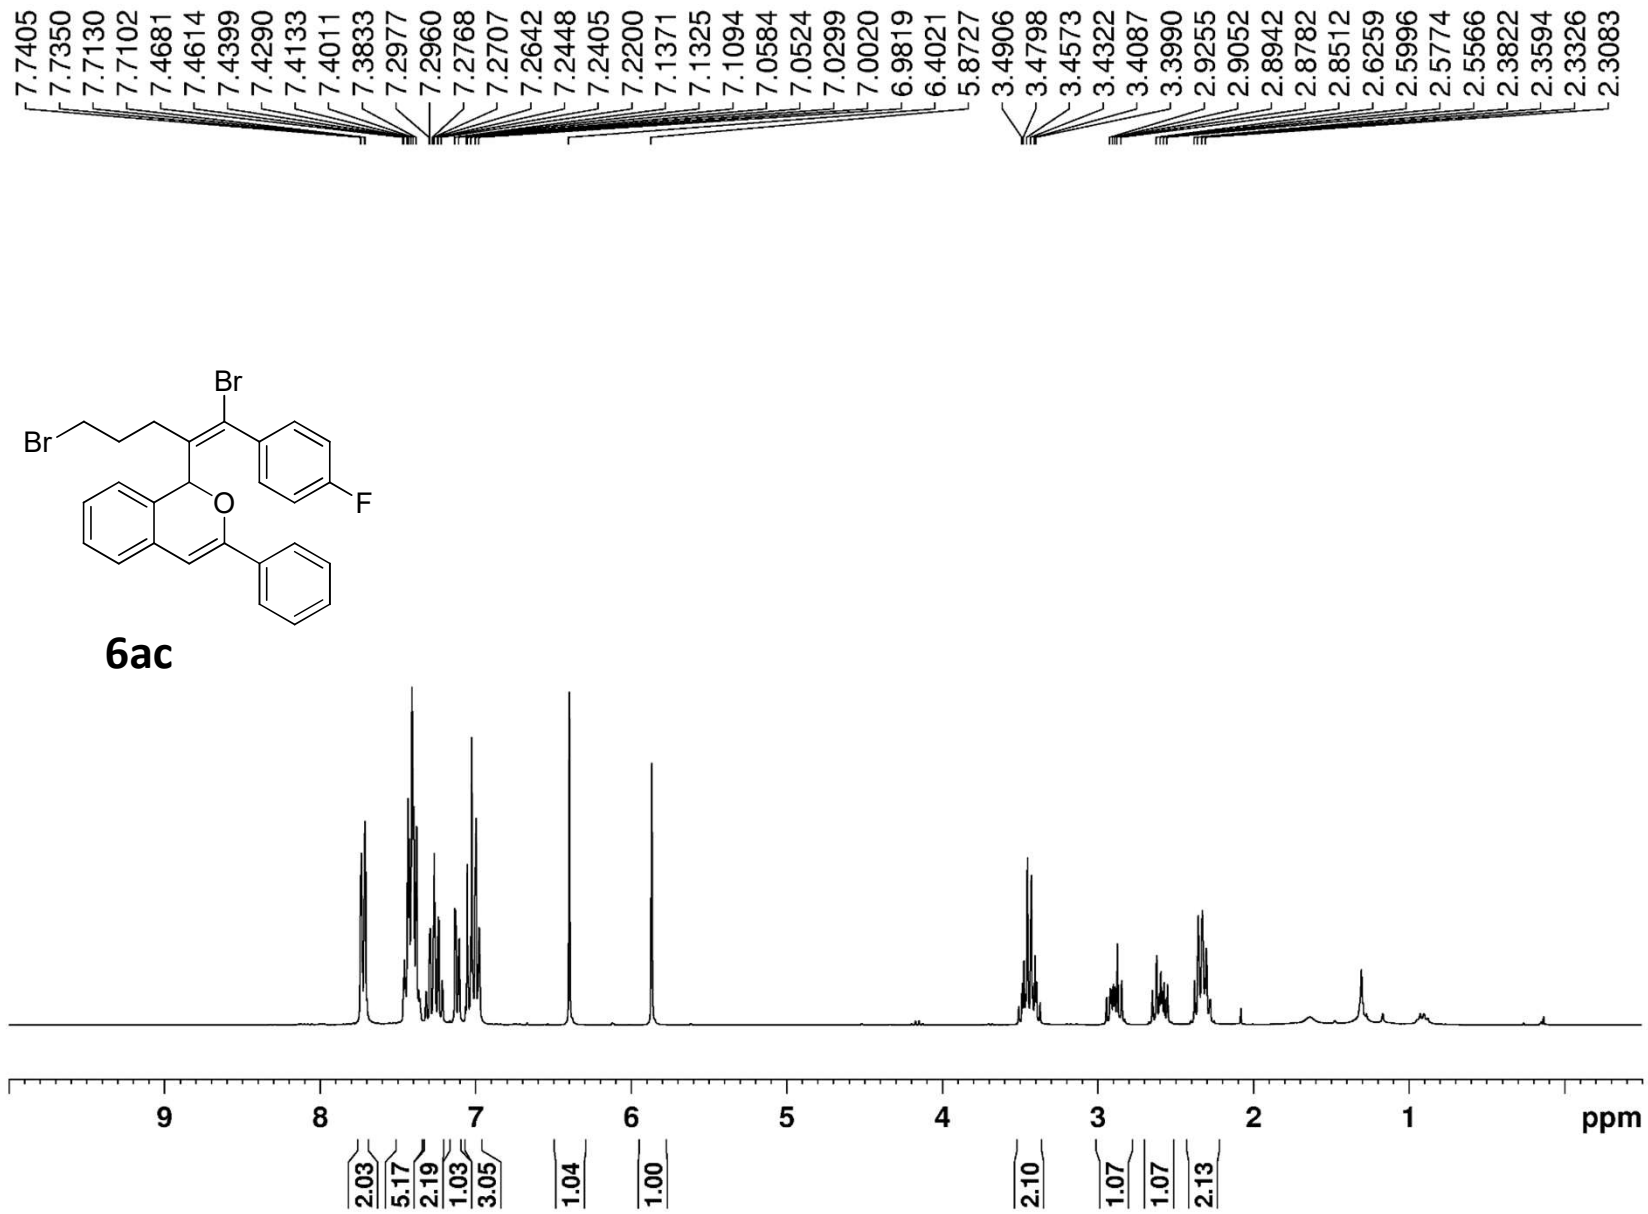

<sup>1</sup>H NMR of compound **6ac** (300 MHz, CDCl<sub>3</sub>)

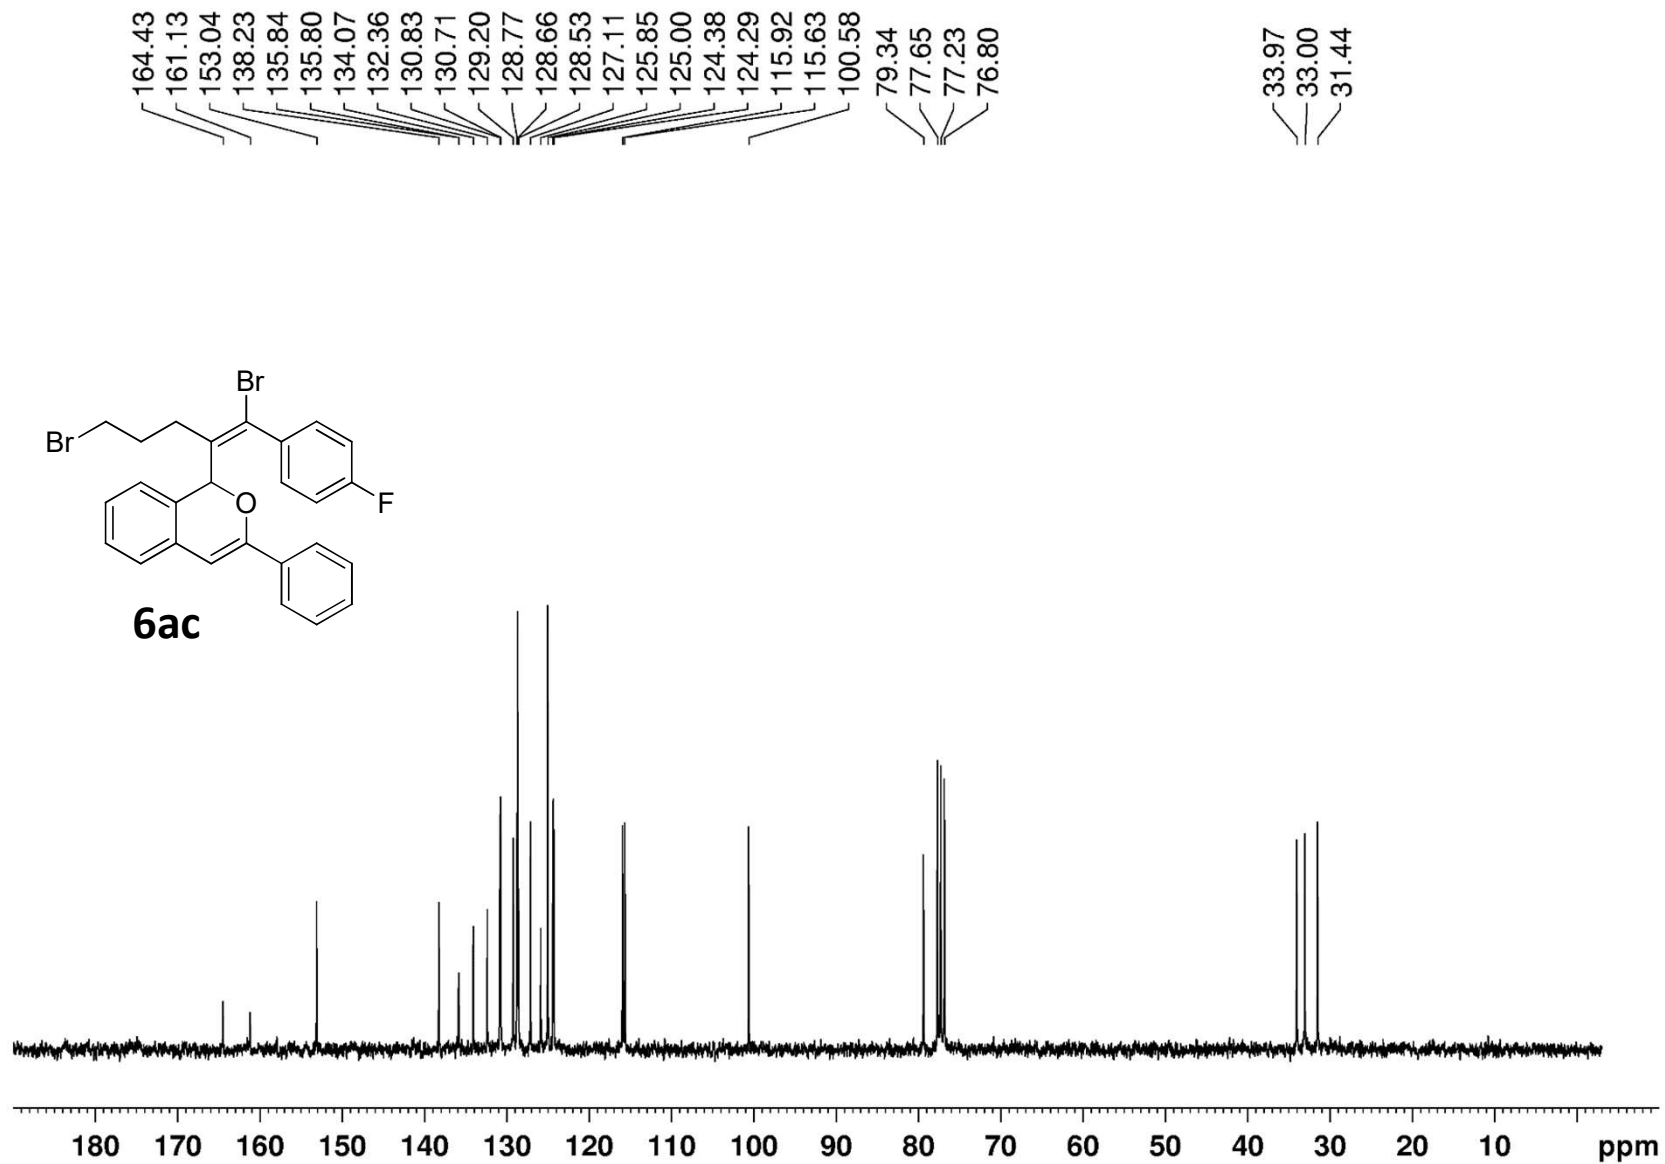

$^{13}\text{C}\{^1\text{H}\}$  NMR of compound **6ac** (75 MHz,  $\text{CDCl}_3$ )

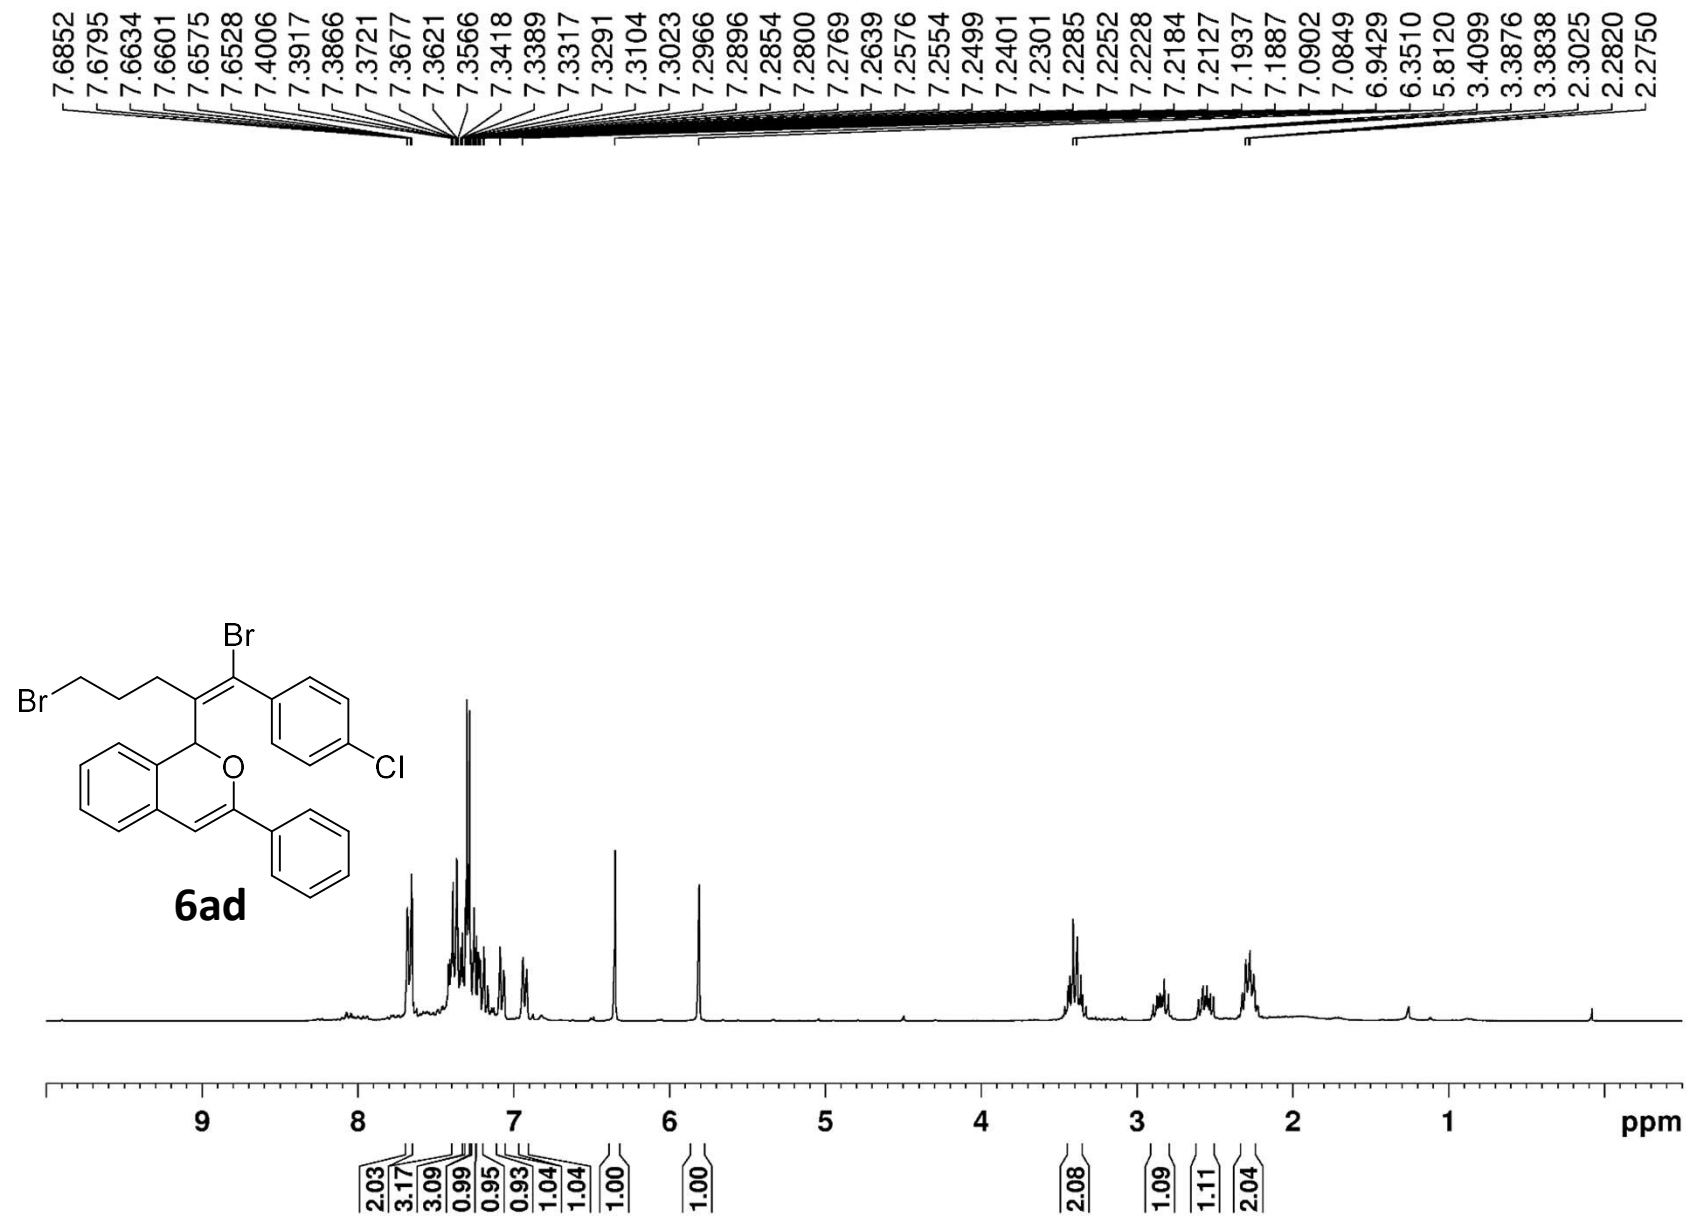

$^1\text{H}$  NMR of compound **6ad** (300 MHz,  $\text{CDCl}_3$ )

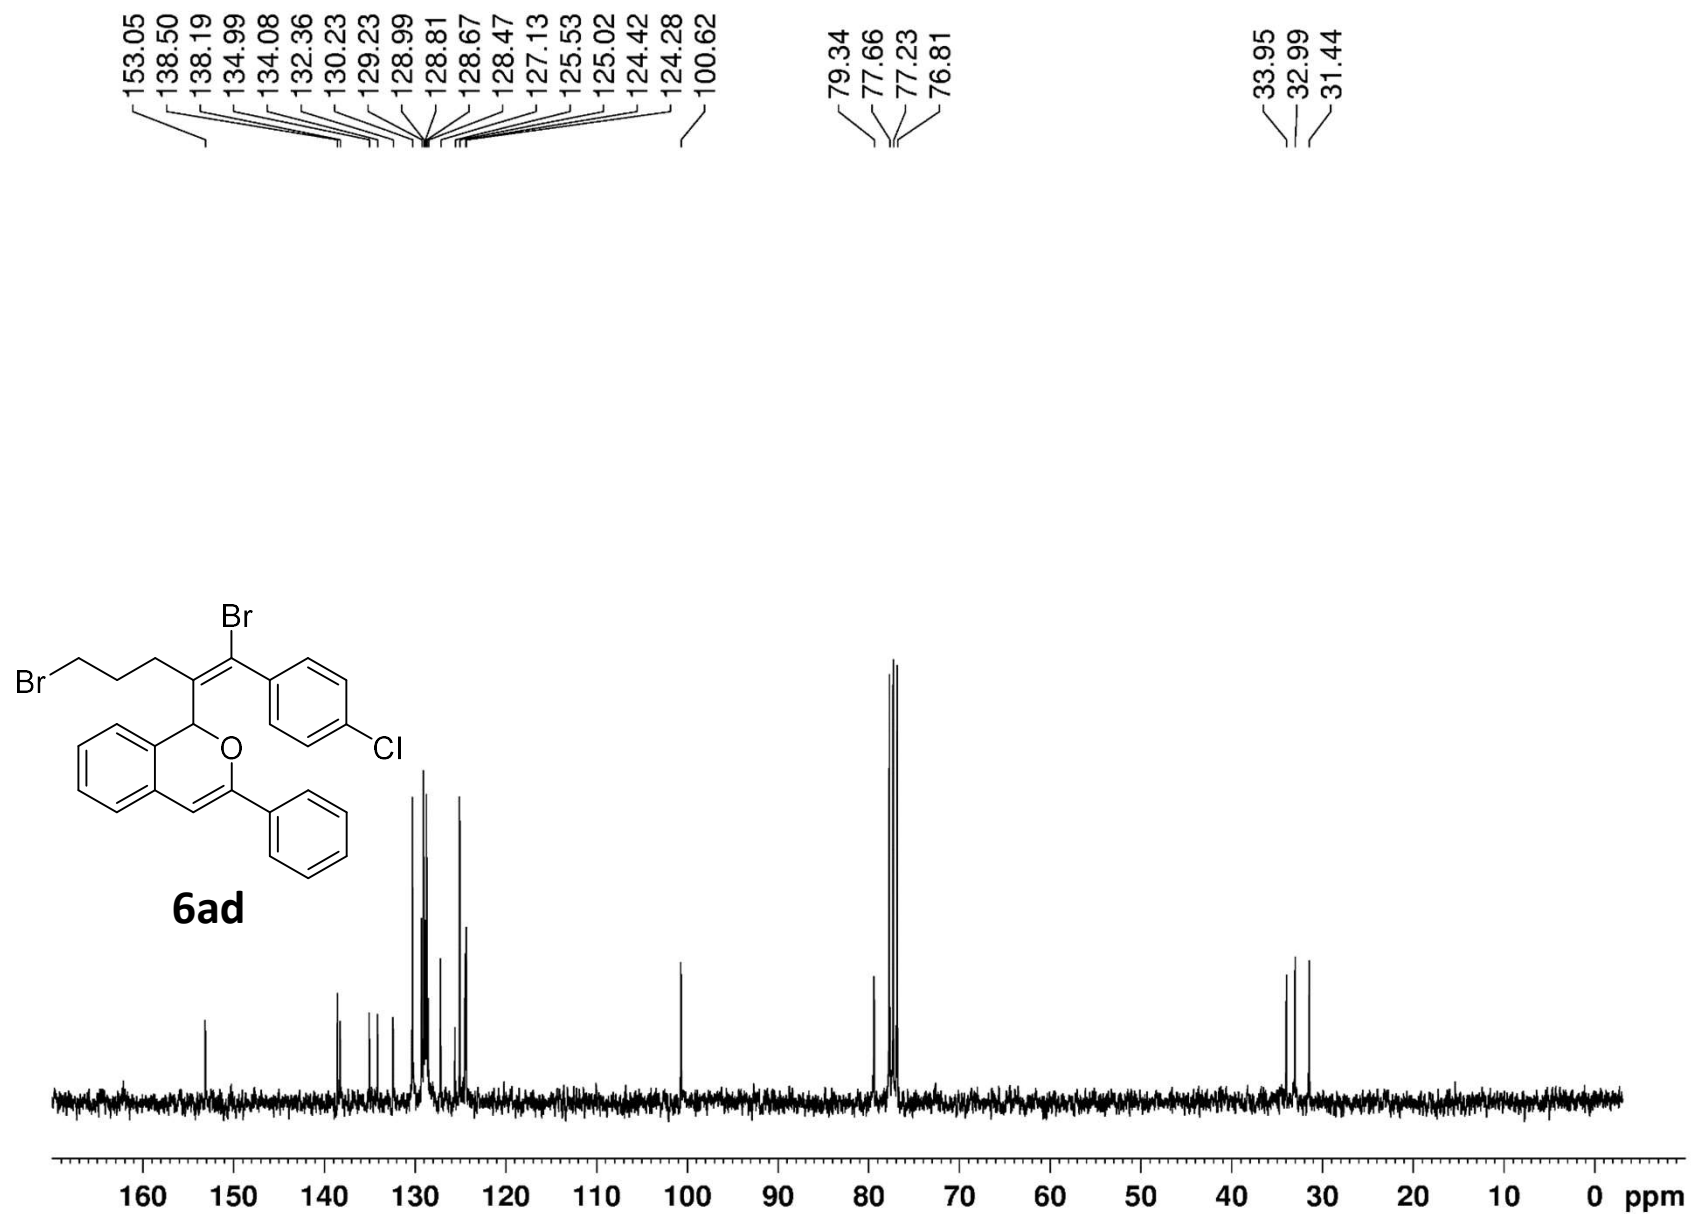

$^{13}\text{C}\{^1\text{H}\}$  NMR of compound **6ad** (75 MHz,  $\text{CDCl}_3$ )

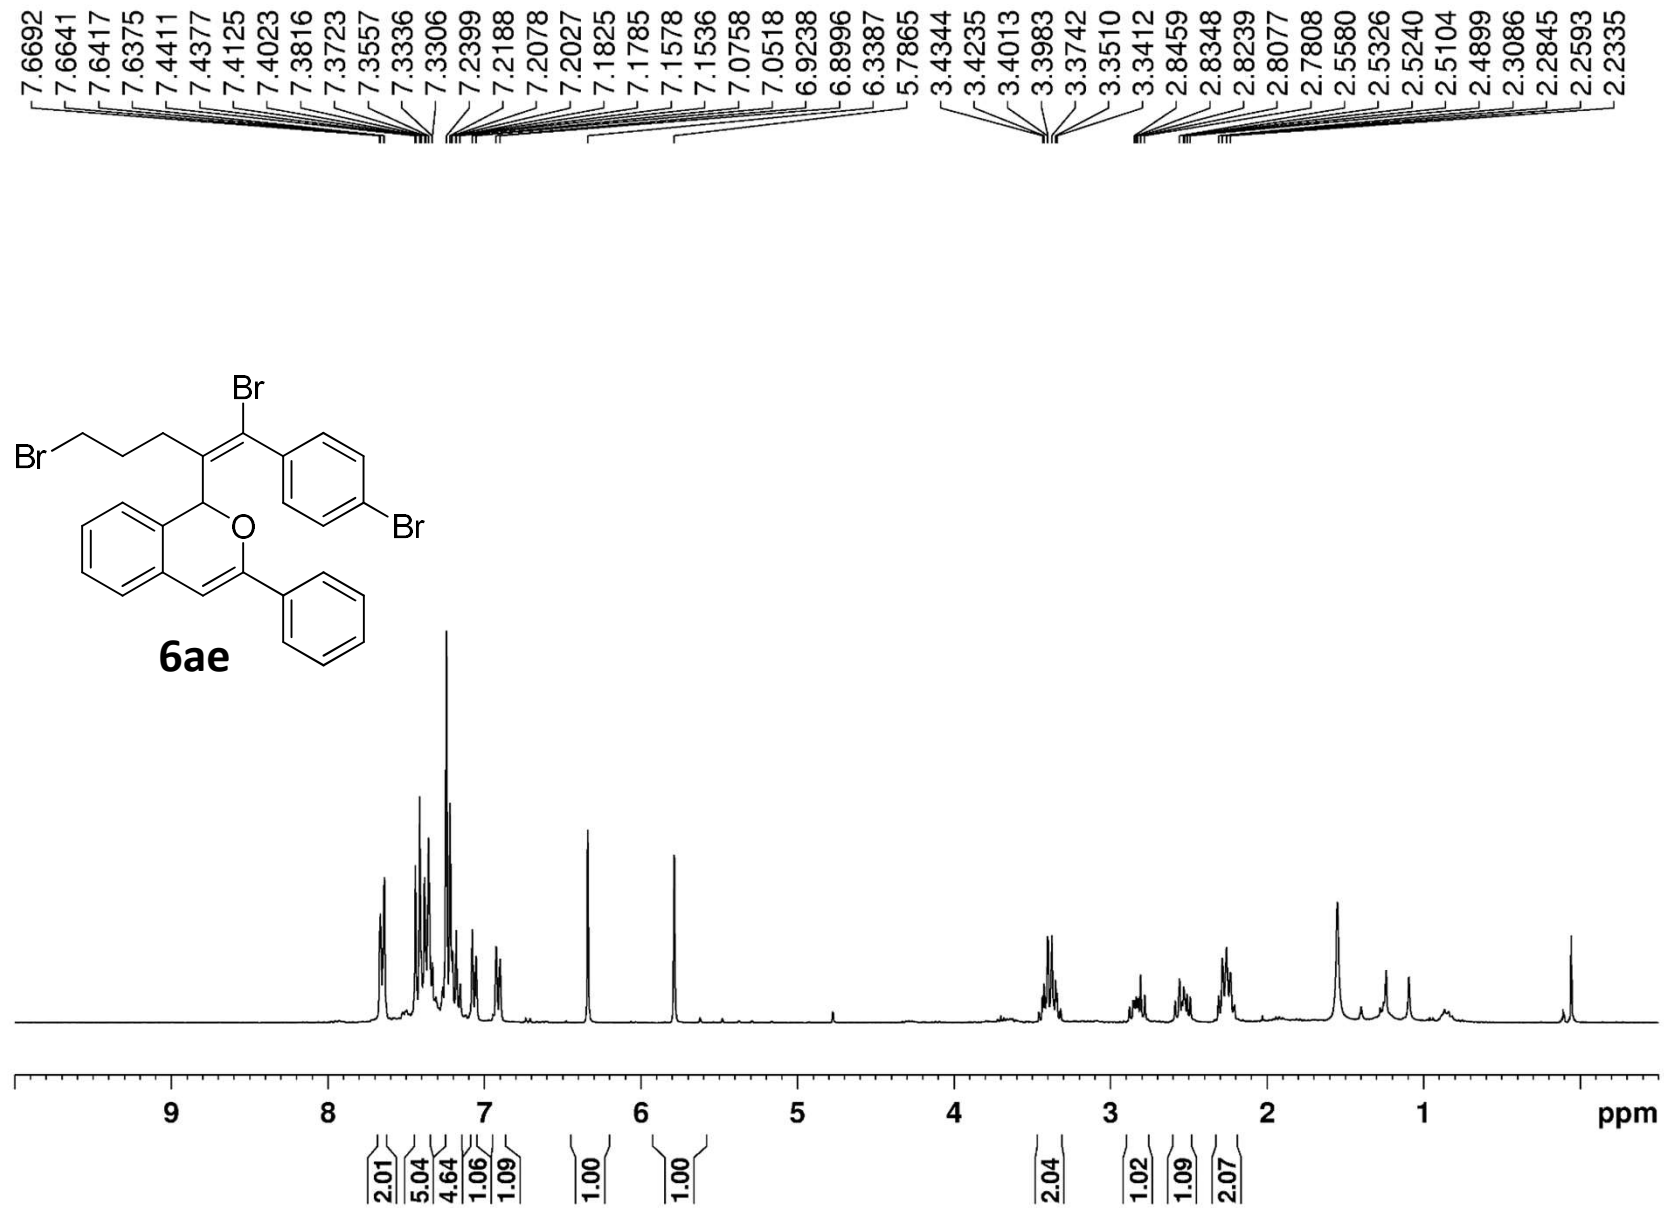

$^1\text{H}$  NMR of compound **6ae** (300 MHz,  $\text{CDCl}_3$ )

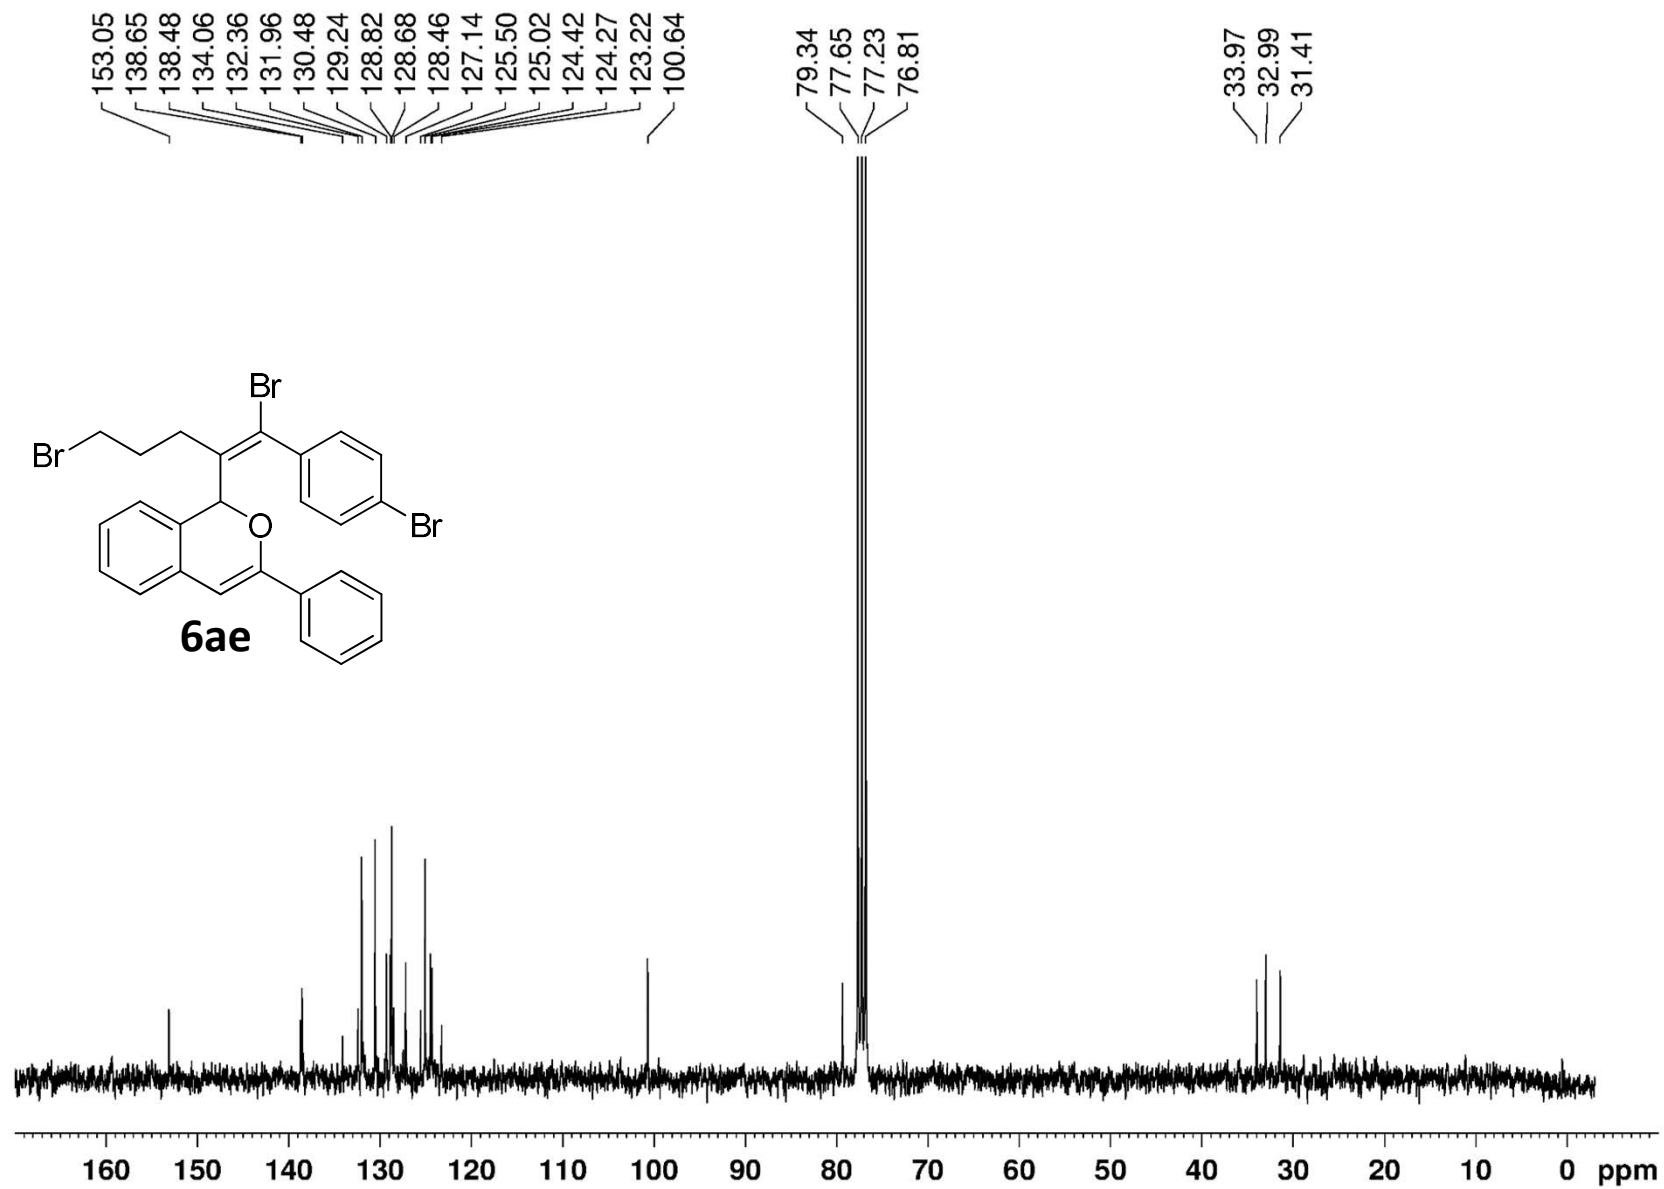

$^{13}\text{C}\{^1\text{H}\}$  NMR of compound **6ae** (75 MHz,  $\text{CDCl}_3$ )

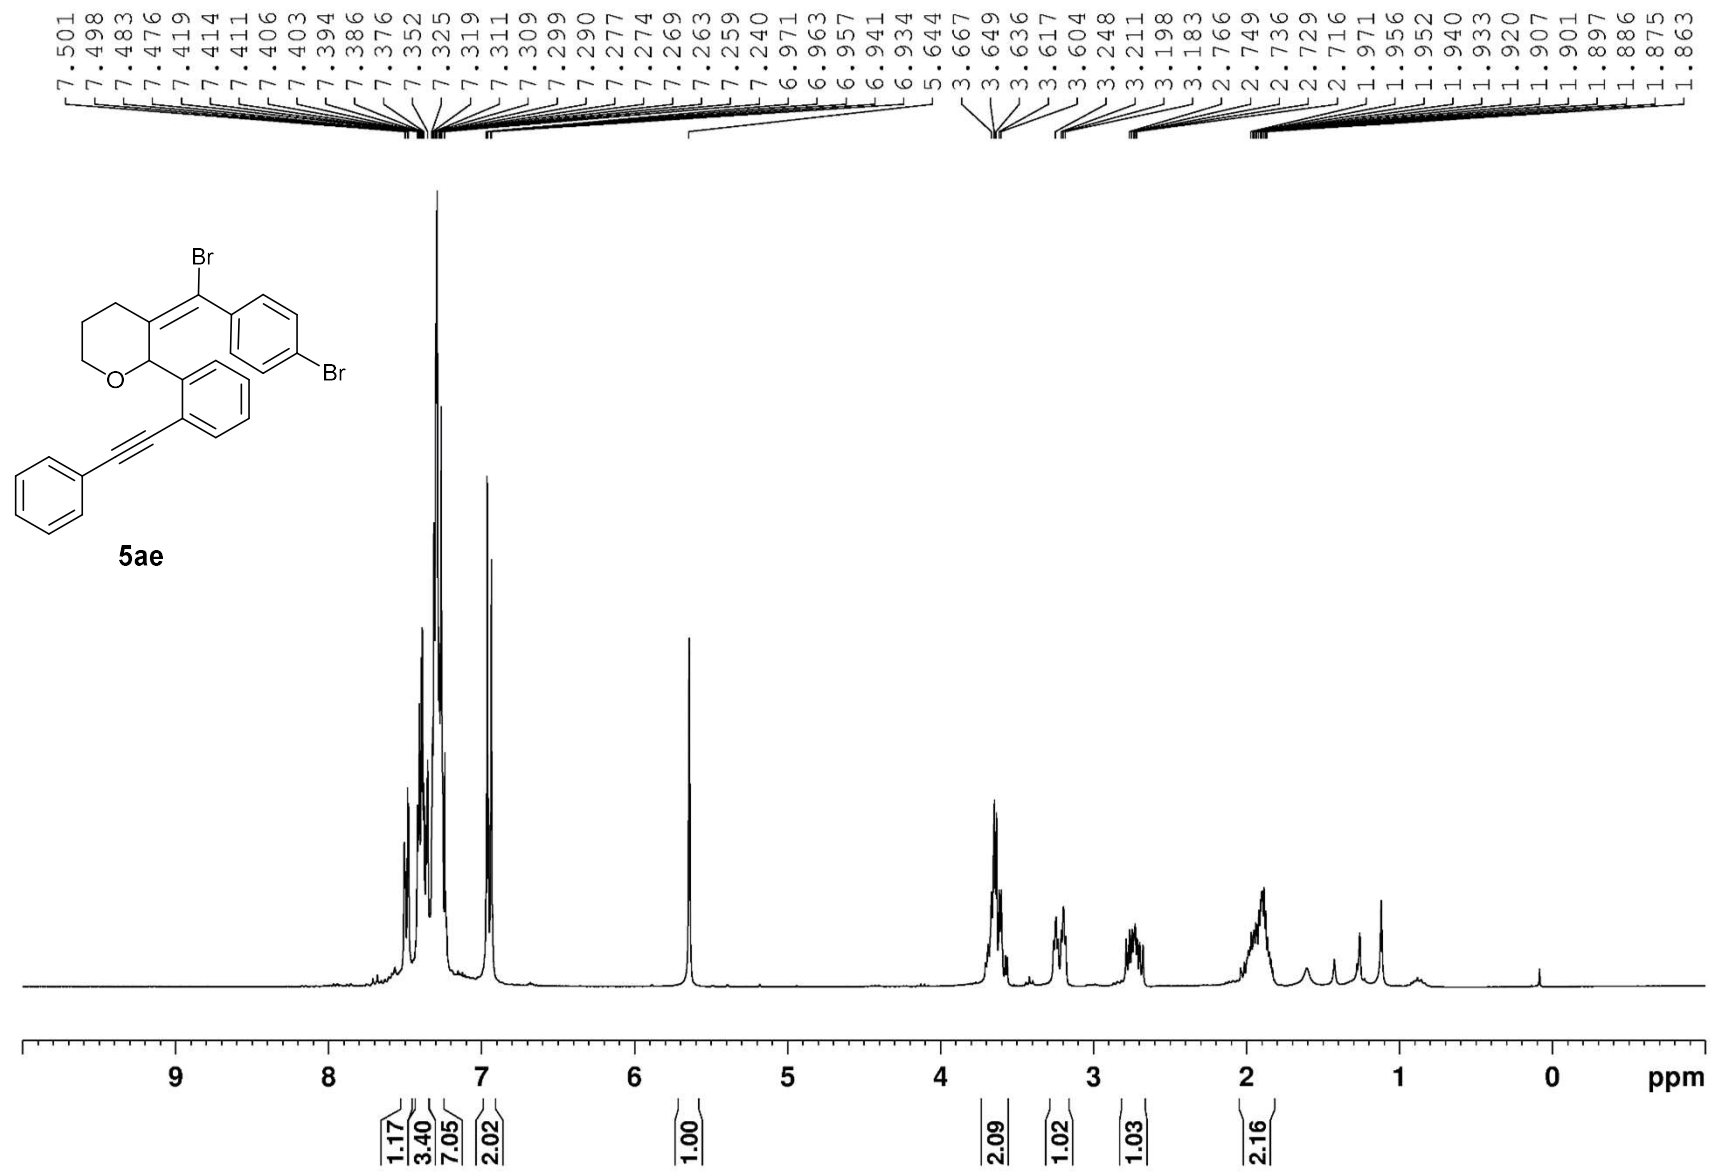

$^1\text{H NMR}$  of compound **5ae** (300 MHz,  $\text{CDCl}_3$ )

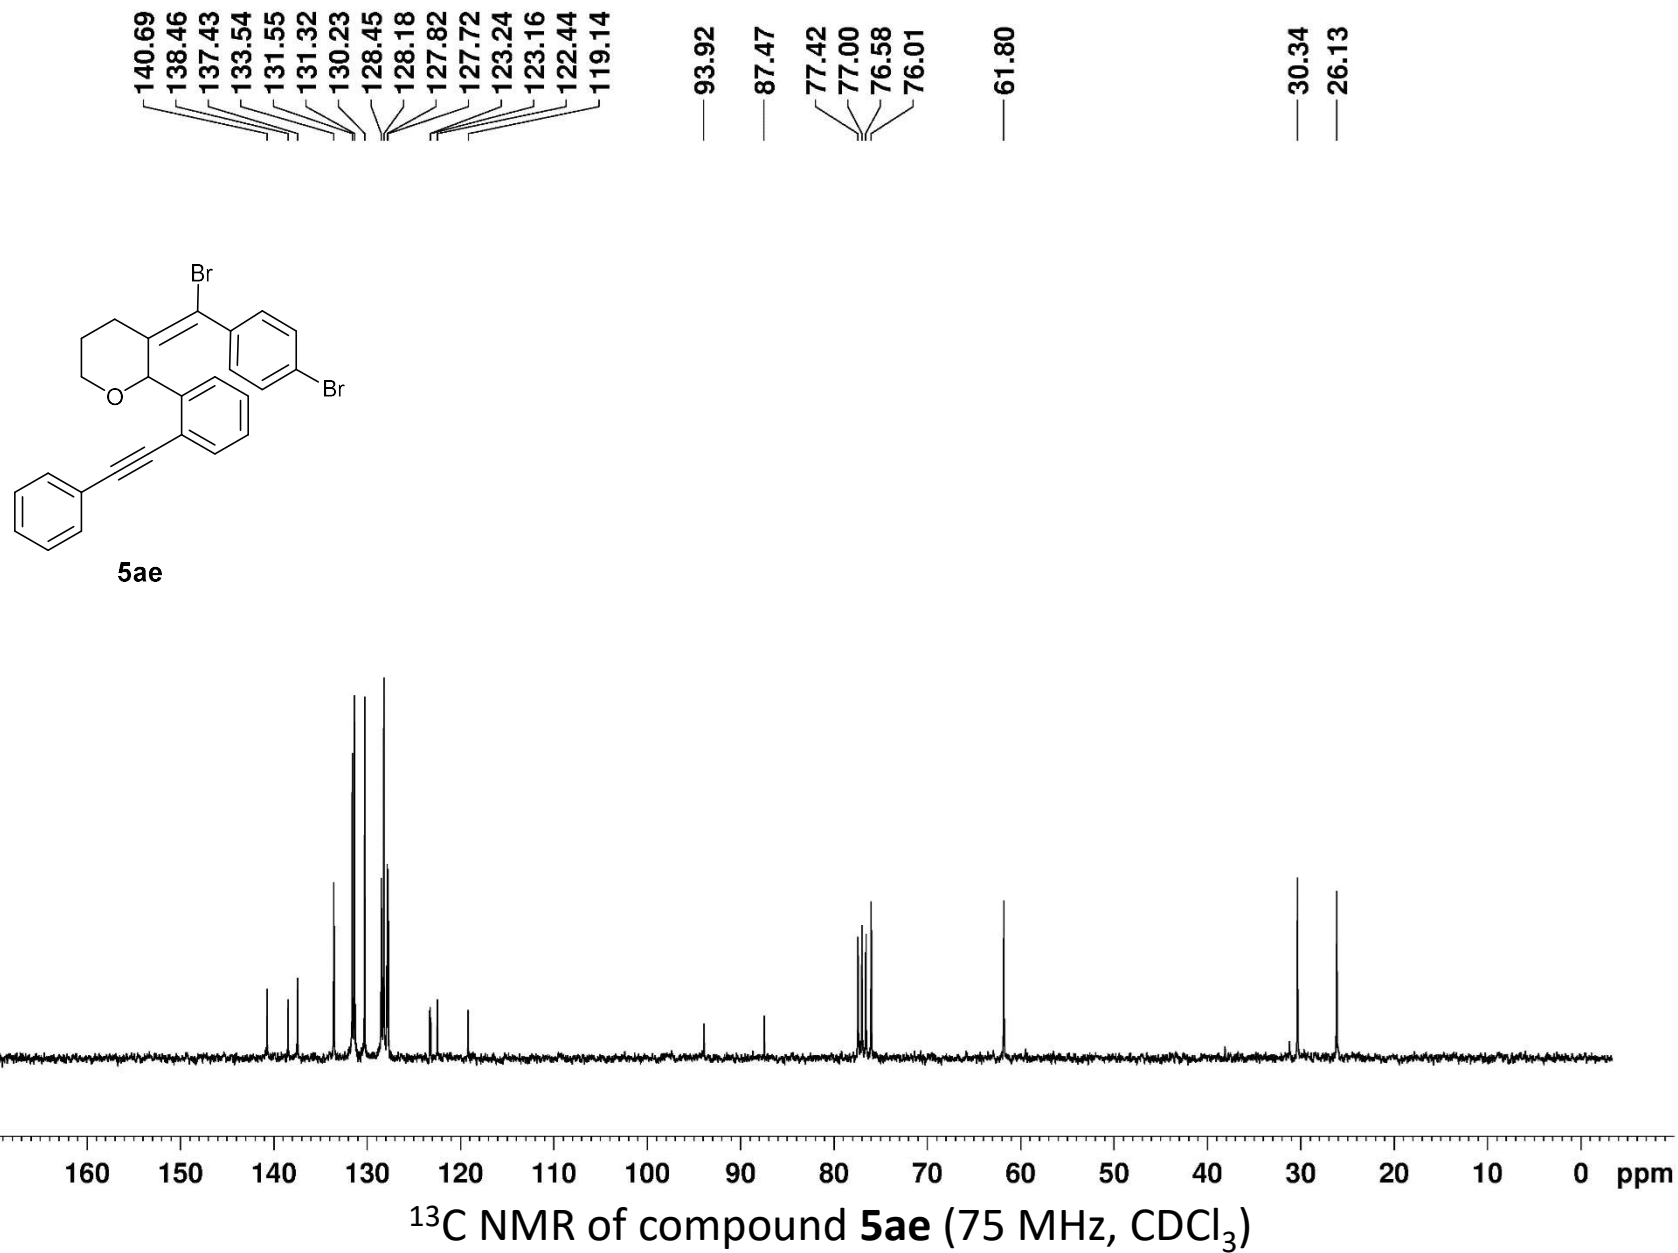





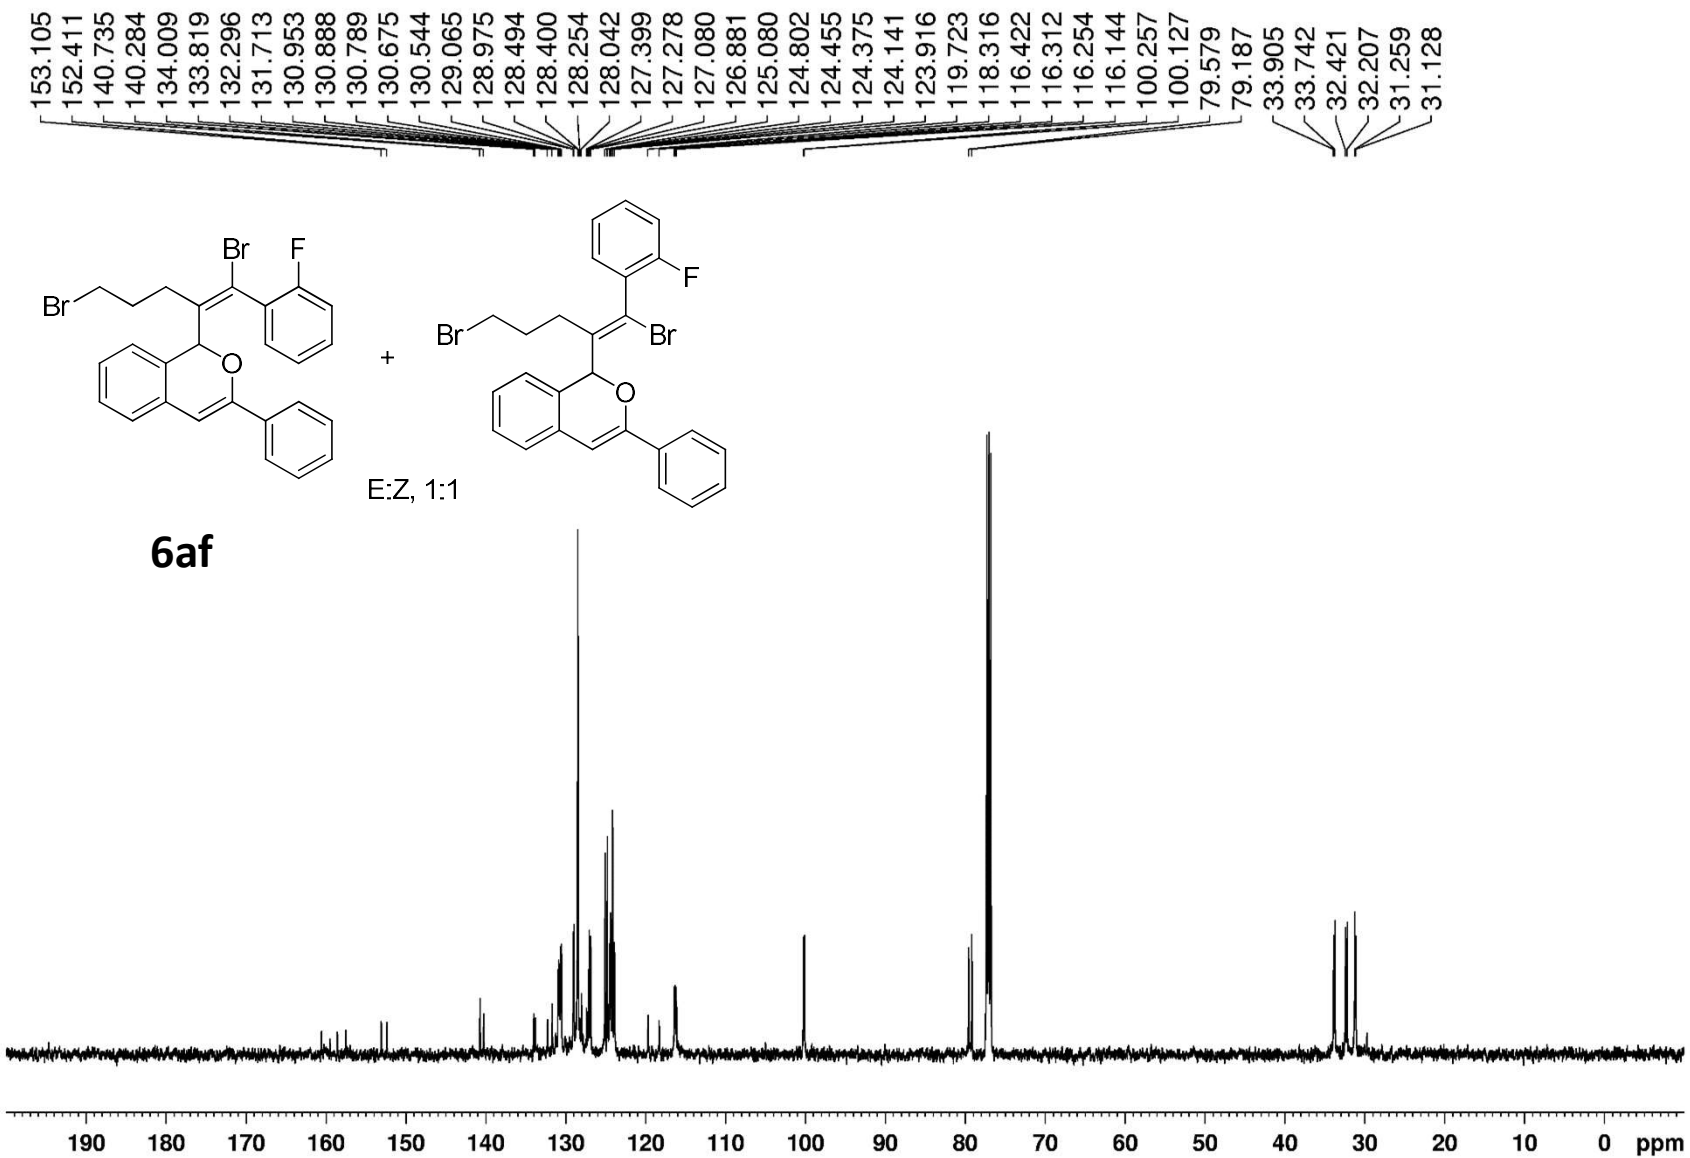

$^{13}\text{C}\{^1\text{H}\}$  NMR of compound **6af** (75 MHz,  $\text{CDCl}_3$ )

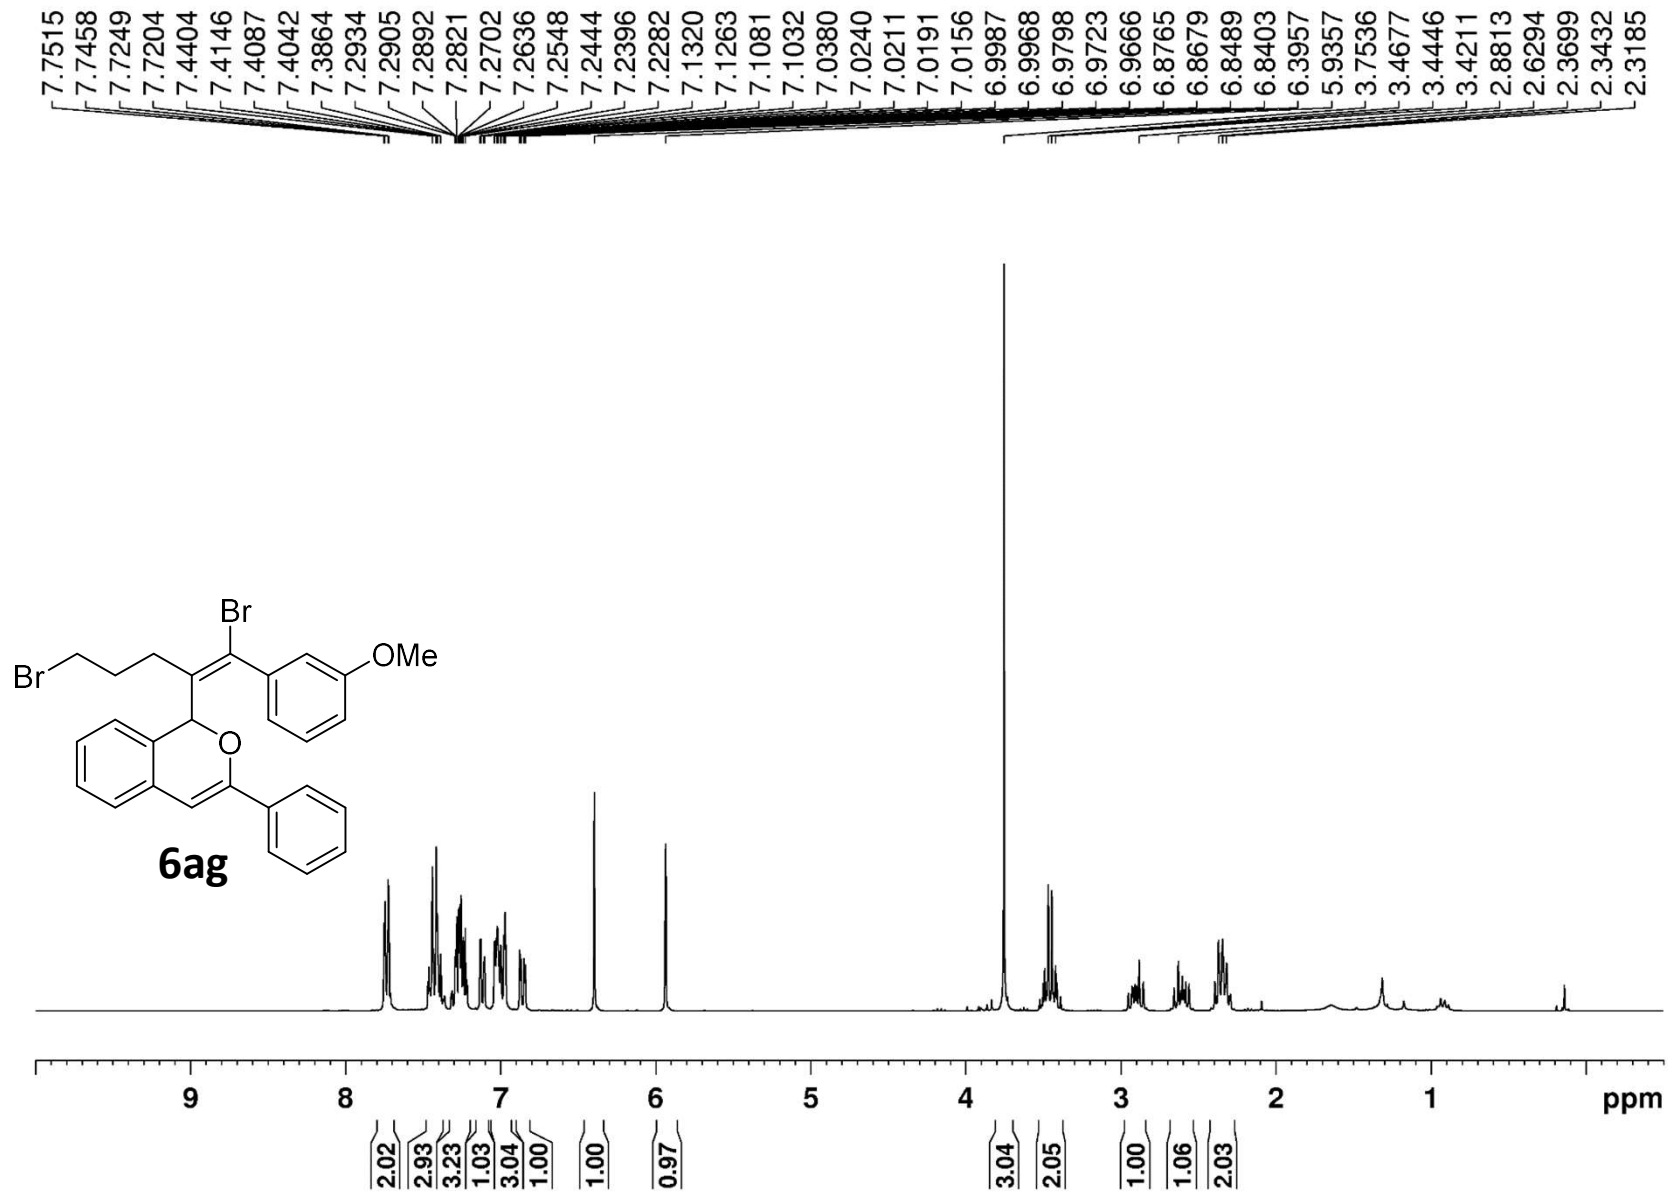

<sup>1</sup>H NMR of compound **6ag** (300 MHz, CDCl<sub>3</sub>)

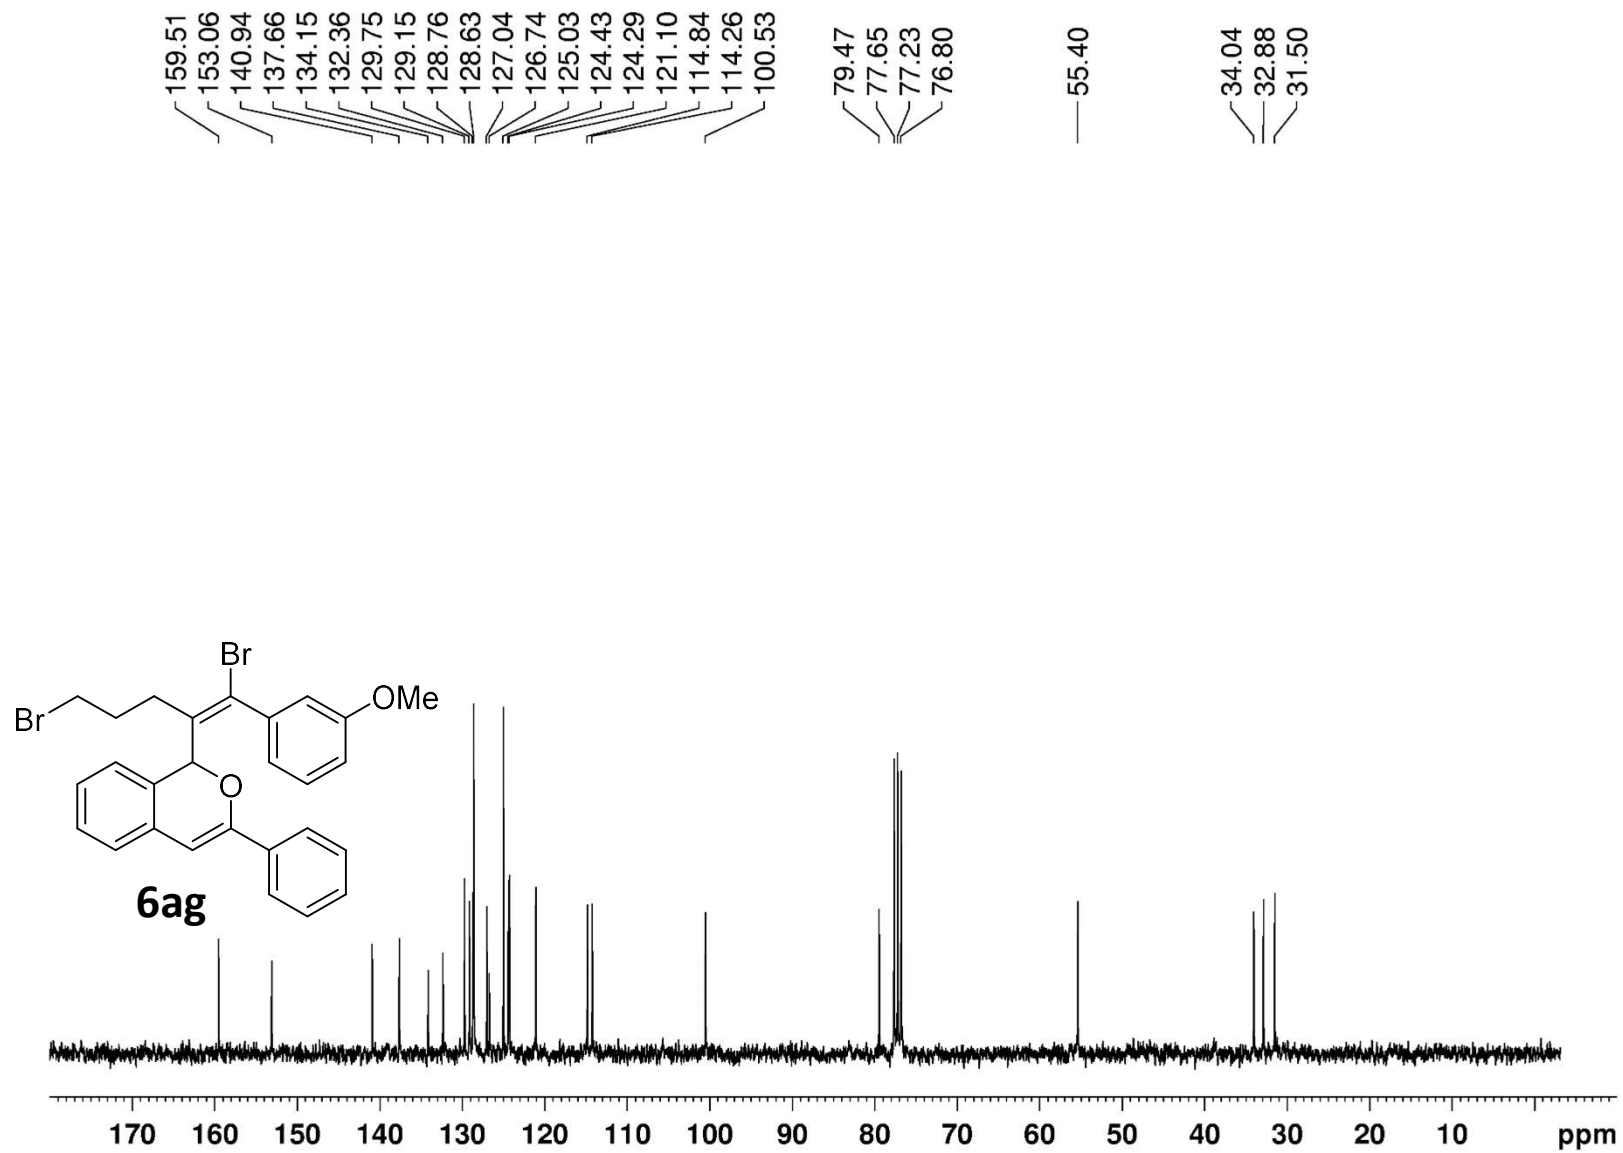

$^{13}\text{C}\{^1\text{H}\}$  NMR of compound **6ag** (75 MHz,  $\text{CDCl}_3$ )

8.282  
7.916  
7.899  
7.883  
7.846  
7.830  
7.792  
7.789  
7.775  
7.725  
7.710  
7.696  
7.673  
7.668  
7.652  
7.649  
7.635  
7.584  
7.570  
7.556  
7.541  
7.524  
7.510  
7.490  
7.474  
7.458  
7.444  
7.428  
7.422  
7.412  
7.396  
7.386  
7.372  
7.298  
7.291  
7.287  
7.281  
7.168  
7.158  
7.151  
7.142  
7.087  
7.080  
7.077  
7.070  
6.310  
6.287  
6.287  
5.881  
5.621  
3.568  
3.561  
3.548  
3.535  
3.530  
3.516  
3.509  
3.502  
3.496  
2.738  
2.726  
2.556  
2.543

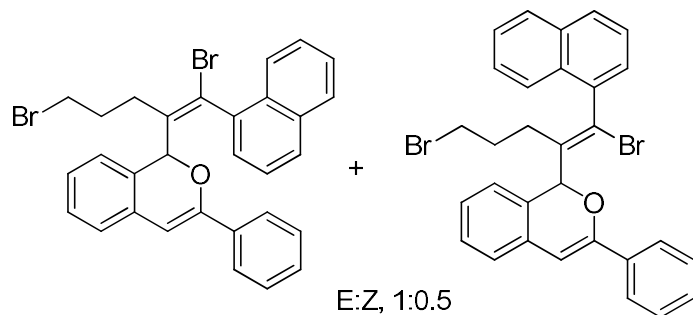

**6ah**

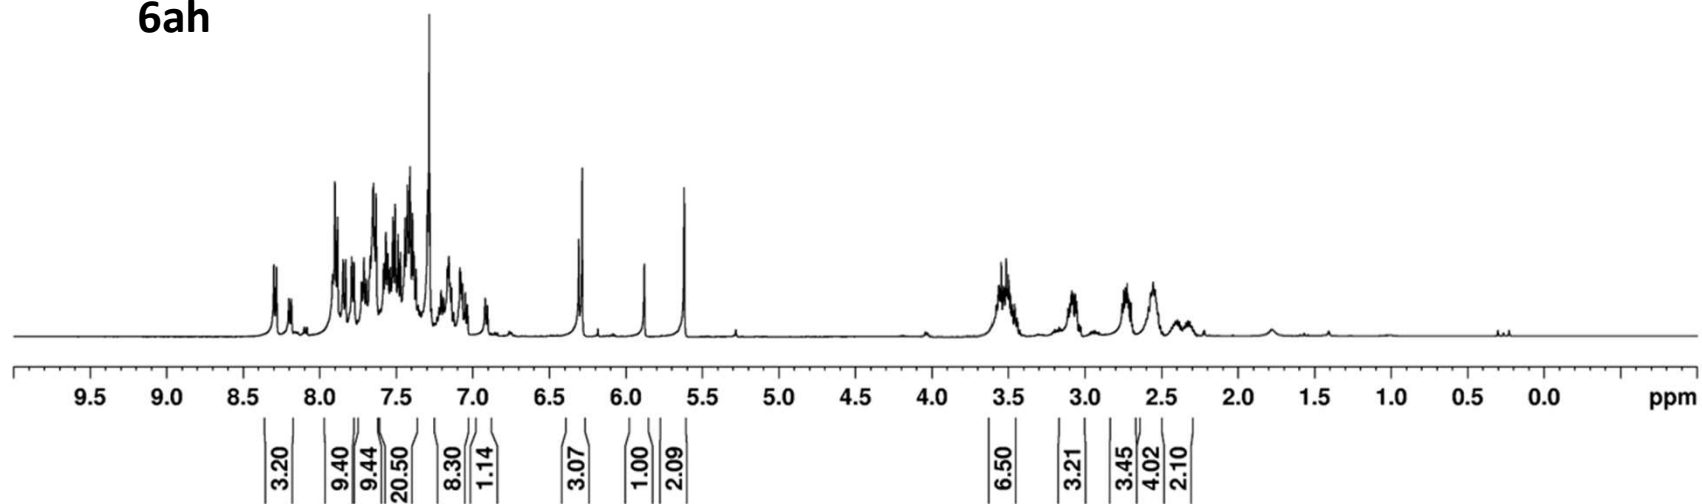

<sup>1</sup>H NMR of compound **6ah** (300 MHz, CDCl<sub>3</sub>)

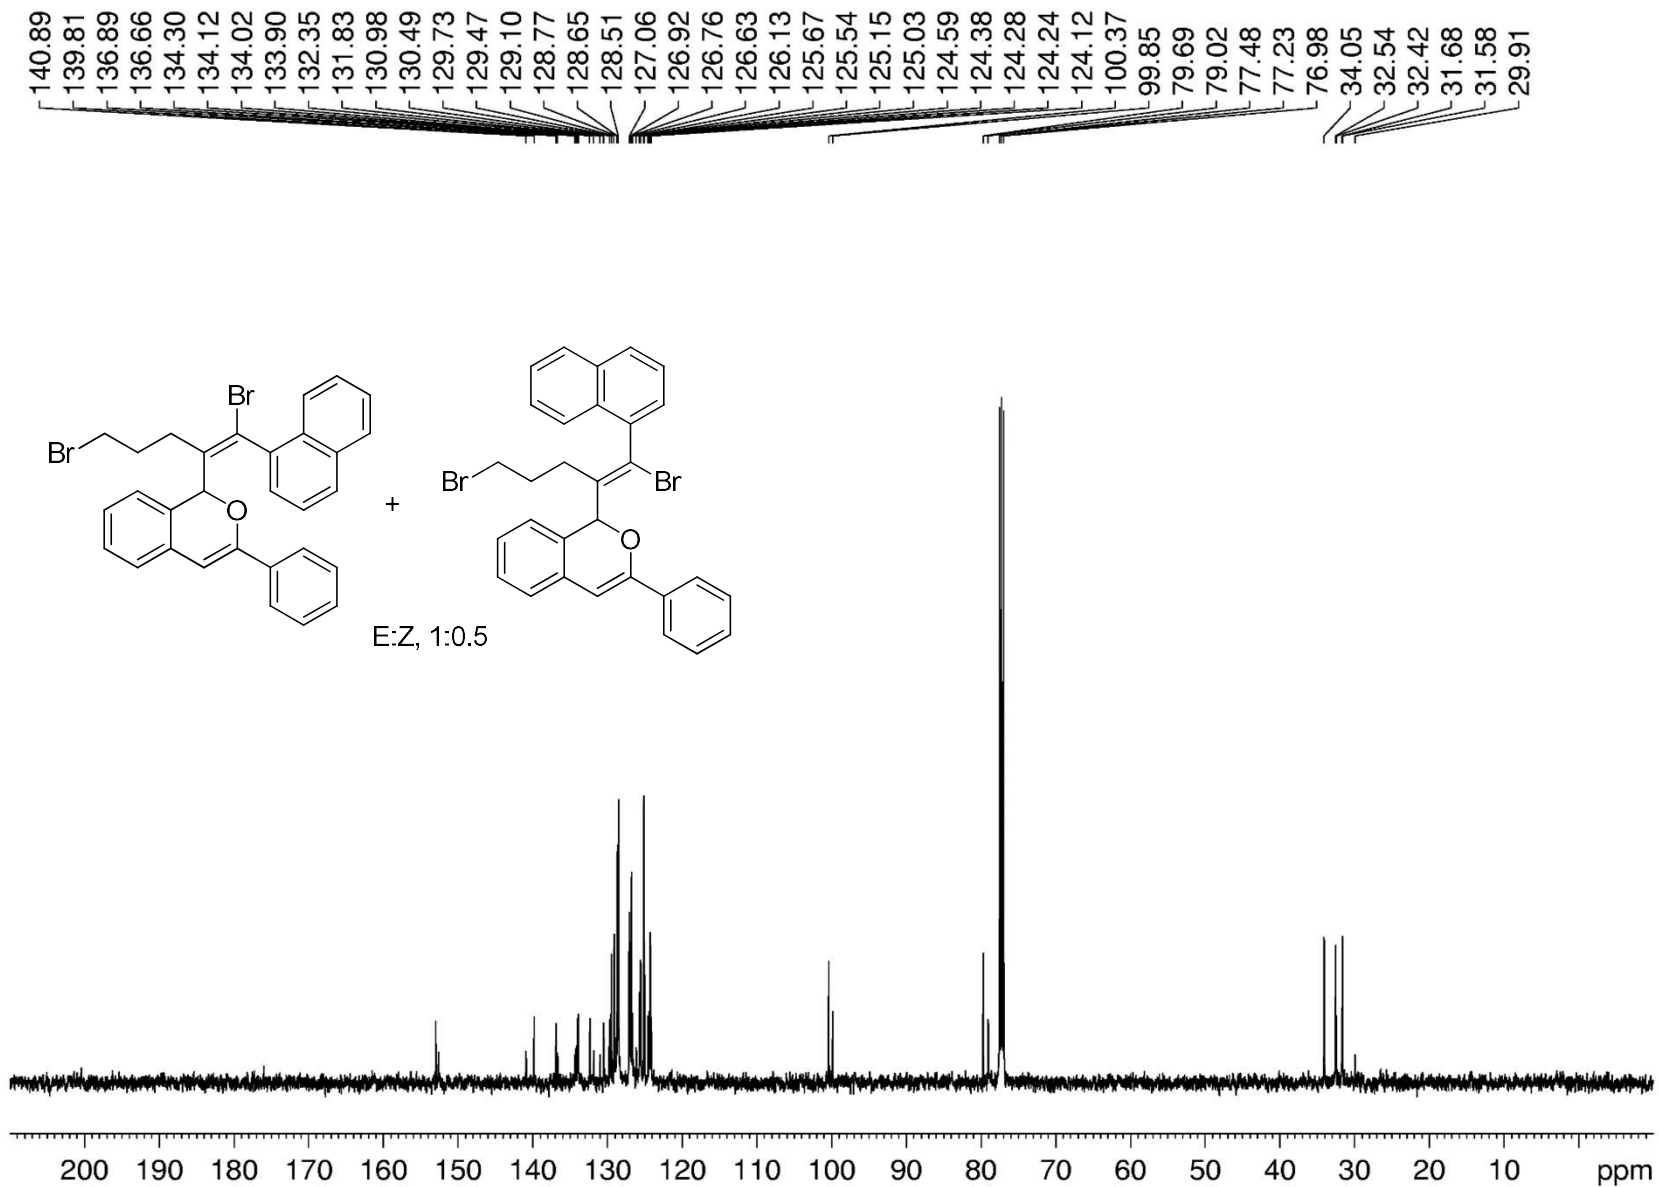

<sup>13</sup>C {<sup>1</sup>H} NMR of compound **6ah** (75 MHz, CDCl<sub>3</sub>)

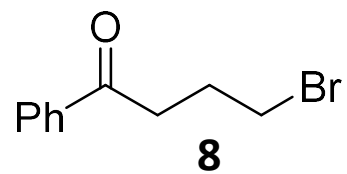

7.9791  
7.9756  
7.9584  
7.9520  
7.9471  
7.5880  
7.5841  
7.5796  
7.5673  
7.5601  
7.5523  
7.5397  
7.5353  
7.5307  
7.4808  
7.4760  
7.4597  
7.4552  
7.4365  
7.4314  
7.4279  
7.2401

3.5593  
3.5383  
3.5172  
3.1947  
3.1716  
3.1626  
3.1485  
2.3436  
2.3220  
2.2998  
2.2781

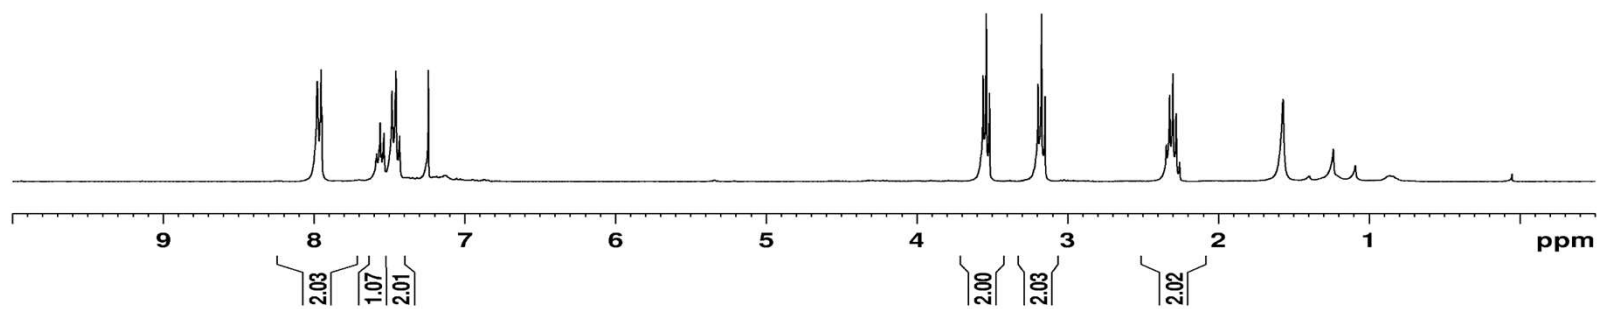

$^1\text{H}$  NMR of compound **8** (300 MHz,  $\text{CDCl}_3$ )

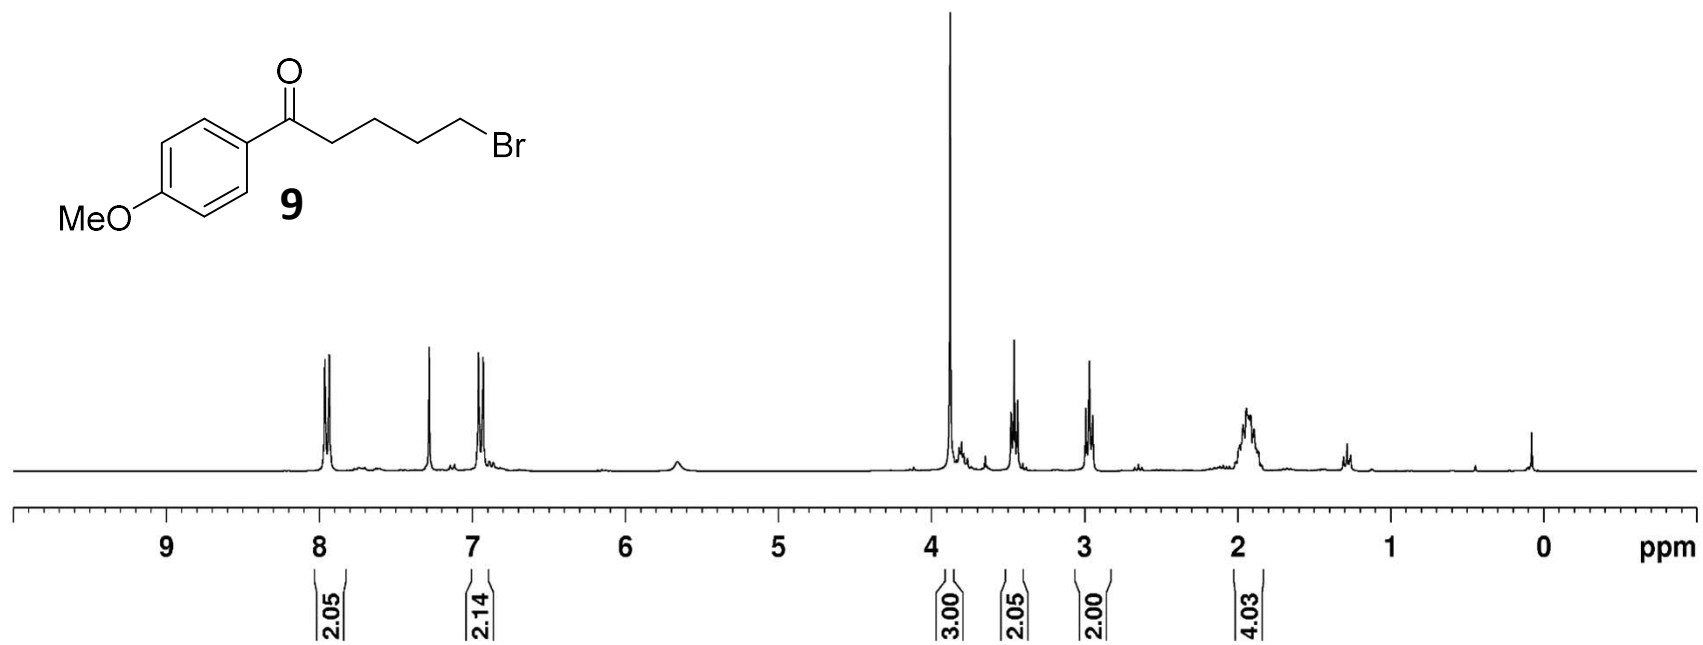

$^1\text{H}$  NMR of compound **9** (300 MHz,  $\text{CDCl}_3$ )
